# Supplementary material for: Specific lid-base contacts in the 26s proteasome control the conformational switching required for substrate degradation
Source: eLife journal article supplement (doi:10.7554/elife.49806), 2019-11-28
Supplement: fig5-figsupp2-data1 [file Gel Quantitation and Analysis.xlsx]

## Sheet: Compiled
	KEY			Wild-type						Rpn5-VTENKIF						Rpt6-EQ
	Term	Meaning		Time (s)	f Ub avg	f Ub sd	f Peptide avg	f Peptide sd		Time (s)	f Ub avg	f Ub sd	f Peptide avg	f Peptide sd		Time (s)	f Ub avg	f Ub sd	f Peptide avg	f Peptide sd
	sd	Standard Deviation		0	0.895199	0.0086899	0.0771992	0.0091631		0	0.850114	0.0190858	0.13063	0.0215301		0	0.889323	0.029381	0.0820002	0.0192147
	f	Fraction		15	0.509725	0.0176593	0.255662	0.00641743		15	0.667928	0.0667075	0.21128	0.0500429		15	0.566308	0.0535916	0.267445	0.0348199
	Avg	Average		30	0.4421	0.111804	0.368259	0.0857395		30	0.583959	0.13061	0.258567	0.081605		30	0.48699	0.149507	0.388948	0.112463
	Ub or Ub(n) or Ubn	Substrate + n Ubiquitin signal		45	0.494949	0.0648049	0.363867	0.0666069		45	0.536908	0.0638279	0.29408	0.0290273		45	0.512645	0.0871919	0.402702	0.0616087
				60	0.499795	0.051755	0.363724	0.064182		60	0.543429	0.0853421	0.303755	0.0911792		60	0.465113	0.0502603	0.470909	0.0355594
				120	0.494482	0.0362483	0.368714	0.0366565		120	0.471063	0.0290598	0.362066	0.0183585		120	0.452773	0.0470662	0.495934	0.0264069
				300	0.445083	0.03857	0.437307	0.0343638		300	0.390409	0.0525626	0.457745	0.0381104		300	0.41827	0.101362	0.519983	0.0714364
				420	0.37329	0.0282324	0.513994	0.0376846		420	0.341178	0.0634952	0.519181	0.051746		420	0.326176	0.117271	0.612061	0.0888026
				600	0.329715	0.050301	0.566665	0.0448234		600	0.322486	0.0291611	0.556069	0.0404139		600	0.421346	0.157547	0.554519	0.152424
				1200	0.315713	0.0466086	0.631161	0.0354213		1200	0.276742	0.0192589	0.644727	0.0227478		1200	0.319429	0.10457	0.666432	0.0978806
				1800	0.32649	0.0404075	0.64311	0.0330621		1800	0.228977	0.0186672	0.730823	0.0354435		1800	0.304631	0.0859092	0.689794	0.08515

## Sheet: Wild-type
Rubber band subtraction																																		Time (s)	f Ub	f Peptide
Time (s)	0	15	30	45	60	120	300	420	600	1200	1800	0	15	30	45	60	120	300	420	600	1200	1800	0	15	30	45	60	120	300	420	600	1200	1800	0	0.886664	0.0872546
wt wt	Lane 1	Lane 2	Lane 3	Lane 4	Lane 5	Lane 6	Lane 7	Lane 8	Lane 9	Lane 10	Lane 11	Lane 12	Lane 13	Lane 14	Lane 15	Lane 16	Lane 17	Lane 18	Lane 19	Lane 20	Lane 21	Lane 22	Lane 23	Lane 24	Lane 25	Lane 26	Lane 27	Lane 28	Lane 29	Lane 30	Lane 31	Lane 32	Lane 33	15	0.529418	0.261684
	Volume	Volume	Volume	Volume	Volume	Volume	Volume	Volume	Volume	Volume	Volume	Volume	Volume	Volume	Volume	Volume	Volume	Volume	Volume	Volume	Volume	Volume	Volume	Volume	Volume	Volume	Volume	Volume	Volume	Volume	Volume	Volume	Volume	30	0.313941	0.46676
Ub n	1.59409e+08	9.50188e+07	3.60421e+07	6.14194e+07	6.5682e+07	6.61308e+07	5.20535e+07	6.64535e+07	5.61929e+07	5.81174e+07	5.13282e+07	1.60645e+08	8.23387e+07	7.14861e+07	6.1347e+07	5.50904e+07	6.19081e+07	6.85798e+07	5.53767e+07	5.28197e+07	3.85528e+07	4.44026e+07	1.46328e+08	6.87751e+07	7.51966e+07	5.10111e+07	6.31075e+07	6.19133e+07	5.55351e+07	4.54546e+07	5.05691e+07	4.58251e+07	44846076	45	0.530694	0.324777
Naked	4.68911e+06	3.74924e+07	2.51768e+07	1.67269e+07	16872944	1.97036e+07	1.59039e+07	2.23861e+07	2.48508e+07	6.86823e+06	1.59826e+06	5.39946e+06	39035301	2.60668e+07	1.60763e+07	1.66412e+07	1.85686e+07	1.71065e+07	1.55099e+07	13273865	1.04299e+07	6.96268e+06	4.31265e+06	3.55179e+07	2.45949e+07	1.68864e+07	1.64809e+07	1.45984e+07	1.35328e+07	1.314e+07	1.38107e+07	6.2522e+06	4.5684e+06	60	0.553971	0.30372
Peptide	1.5687e+07	4.69665e+07	5.35866e+07	3.75877e+07	3.60108e+07	4.45166e+07	6.18835e+07	8.74854e+07	1.12354e+08	9.36194e+07	8.5887e+07	1.34675e+07	4.18486e+07	4.75363e+07	3.74567e+07	3.96628e+07	5.60169e+07	6.26569e+07	6.77091e+07	7.05876e+07	9.13336e+07	8.74096e+07	1.12203e+07	3.45628e+07	4.49139e+07	5.35161e+07	6.03831e+07	4.19695e+07	4.85809e+07	7.37585e+07	9.76248e+07	9.77004e+07	1.05364e+08	120	0.507329	0.341513
sum	1.79785e+08	1.79478e+08	1.14806e+08	1.15734e+08	1.18566e+08	1.30351e+08	1.29841e+08	1.76325e+08	1.93398e+08	1.58605e+08	1.38813e+08	1.79512e+08	1.63223e+08	1.45089e+08	1.1488e+08	1.11394e+08	1.36494e+08	1.48343e+08	1.38596e+08	1.36681e+08	1.40316e+08	1.38775e+08	1.61861e+08	1.38856e+08	1.44705e+08	1.21414e+08	1.39972e+08	1.18481e+08	1.17649e+08	132353175	1.62005e+08	1.49778e+08	1.54778e+08	300	0.400902	0.47661
f Ub	0.886664	0.529418	0.313941	0.530694	0.553971	0.507329	0.400902	0.376881	0.290556	0.366428	0.369764	0.894898	0.504457	0.492705	0.534009	0.494553	0.45356	0.462305	0.399556	0.386445	0.274756	0.319961	0.904036	0.495299	0.519653	0.420143	0.45086	0.522558	0.472041	0.343434	0.312146	0.305954	0.289744	420	0.376881	0.49616
f Naked	0.0260818	0.208897	0.219299	0.144529	0.142309	0.151158	0.122488	0.126959	0.128496	0.043304	0.0115137	0.0300786	0.239154	0.17966	0.13994	0.14939	0.13604	0.115317	0.111907	0.0971156	0.0743313	0.0501724	0.0266441	0.25579	0.169965	0.139082	0.117745	0.123213	0.115027	0.09928	0.0852489	0.0417432	0.0295157	600	0.290556	0.580949
f Peptide	0.0872546	0.261684	0.46676	0.324777	0.30372	0.341513	0.47661	0.49616	0.580949	0.590268	0.618722	0.0750229	0.25639	0.327635	0.326051	0.356057	0.4104	0.422378	0.488537	0.51644	0.650912	0.629866	0.0693202	0.248911	0.310381	0.440775	0.431395	0.354229	0.412932	0.557286	0.602605	0.652303	0.68074	1200	0.366428	0.590268
																																		1800	0.369764	0.618722
																																		0	0.894898	0.0750229
																																		15	0.504457	0.25639
																																		30	0.492705	0.327635
																																		45	0.534009	0.326051
																																		60	0.494553	0.356057
																																		120	0.45356	0.4104
																																		300	0.462305	0.422378
																																		420	0.399556	0.488537
																																		600	0.386445	0.51644
																																		1200	0.274756	0.650912
																																		1800	0.319961	0.629866
																																		0	0.904036	0.0693202
																																		15	0.495299	0.248911
																																		30	0.519653	0.310381
Time (s)	0	15	30	45	60	120	300	420	600	1200	1800	0	15	30	45	60	120	300	420	600	1200	1800	0	15	30	45	60	120	300	420	600	1200	1800	45	0.420143	0.440775
wt wt	Lane 1	Lane 2	Lane 3	Lane 4	Lane 5	Lane 6	Lane 7	Lane 8	Lane 9	Lane 10	Lane 11	Lane 12	Lane 13	Lane 14	Lane 15	Lane 16	Lane 17	Lane 18	Lane 19	Lane 20	Lane 21	Lane 22	Lane 23	Lane 24	Lane 25	Lane 26	Lane 27	Lane 28	Lane 29	Lane 30	Lane 31	Lane 32	Lane 33	60	0.45086	0.431395
	Volume	Volume	Volume	Volume	Volume	Volume	Volume	Volume	Volume	Volume	Volume	Volume	Volume	Volume	Volume	Volume	Volume	Volume	Volume	Volume	Volume	Volume	Volume	Volume	Volume	Volume	Volume	Volume	Volume	Volume	Volume	Volume	Volume	120	0.522558	0.354229
Ub n	1.59409e+08	9.50188e+07	3.60421e+07	6.14194e+07	6.5682e+07	6.61308e+07	5.20535e+07	6.64535e+07	5.61929e+07	5.81174e+07	5.13282e+07	1.60645e+08	8.23387e+07	7.14861e+07	6.1347e+07	5.50904e+07	6.19081e+07	6.85798e+07	5.53767e+07	5.28197e+07	3.85528e+07	4.44026e+07	1.46328e+08	6.87751e+07	7.51966e+07	5.10111e+07	6.31075e+07	6.19133e+07	5.55351e+07	4.54546e+07	5.05691e+07	4.58251e+07	44846076	300	0.472041	0.412932
Naked	4.68911e+06	3.74924e+07	2.51768e+07	1.67269e+07	16872944	1.97036e+07	1.59039e+07	2.23861e+07	2.48508e+07	6.86823e+06	1.59826e+06	5.39946e+06	39035301	2.60668e+07	1.60763e+07	1.66412e+07	1.85686e+07	1.71065e+07	1.55099e+07	13273865	1.04299e+07	6.96268e+06	4.31265e+06	3.55179e+07	2.45949e+07	1.68864e+07	1.64809e+07	1.45984e+07	1.35328e+07	1.314e+07	1.38107e+07	6.2522e+06	4.5684e+06	420	0.343434	0.557286
Peptide	1.5687e+07	4.69665e+07	5.35866e+07	3.75877e+07	3.60108e+07	4.45166e+07	6.18835e+07	8.74854e+07	1.12354e+08	9.36194e+07	8.5887e+07	1.34675e+07	4.18486e+07	4.75363e+07	3.74567e+07	3.96628e+07	5.60169e+07	6.26569e+07	6.77091e+07	7.05876e+07	9.13336e+07	8.74096e+07	1.12203e+07	3.45628e+07	4.49139e+07	5.35161e+07	6.03831e+07	4.19695e+07	4.85809e+07	7.37585e+07	9.76248e+07	9.77004e+07	1.05364e+08	600	0.312146	0.602605
sum	1.79785e+08	1.79478e+08	1.14806e+08	1.15734e+08	1.18566e+08	1.30351e+08	1.29841e+08	1.76325e+08	1.93398e+08	1.58605e+08	1.38813e+08	1.79512e+08	1.63223e+08	1.45089e+08	1.1488e+08	1.11394e+08	1.36494e+08	1.48343e+08	1.38596e+08	1.36681e+08	1.40316e+08	1.38775e+08	1.61861e+08	1.38856e+08	1.44705e+08	1.21414e+08	1.39972e+08	1.18481e+08	1.17649e+08	132353175	1.62005e+08	1.49778e+08	1.54778e+08	1200	0.305954	0.652303
f Ub	0.886664	0.529418	0.313941	0.530694	0.553971	0.507329	0.400902	0.376881	0.290556	0.366428	0.369764	0.894898	0.504457	0.492705	0.534009	0.494553	0.45356	0.462305	0.399556	0.386445	0.274756	0.319961	0.904036	0.495299	0.519653	0.420143	0.45086	0.522558	0.472041	0.343434	0.312146	0.305954	0.289744	1800	0.289744	0.68074
f Naked	0.0260818	0.208897	0.219299	0.144529	0.142309	0.151158	0.122488	0.126959	0.128496	0.043304	0.0115137	0.0300786	0.239154	0.17966	0.13994	0.14939	0.13604	0.115317	0.111907	0.0971156	0.0743313	0.0501724	0.0266441	0.25579	0.169965	0.139082	0.117745	0.123213	0.115027	0.09928	0.0852489	0.0417432	0.0295157
f Peptide	0.0872546	0.261684	0.46676	0.324777	0.30372	0.341513	0.47661	0.49616	0.580949	0.590268	0.618722	0.0750229	0.25639	0.327635	0.326051	0.356057	0.4104	0.422378	0.488537	0.51644	0.650912	0.629866	0.0693202	0.248911	0.310381	0.440775	0.431395	0.354229	0.412932	0.557286	0.602605	0.652303	0.68074
Time (s)	f Ub	f Naked	f Peptide	Time (s)	f Ub	f Naked	f Peptide	Time (s)	f Ub	f Naked	f Peptide	Time (s)	f Ub avg	f Naked avg	f Peptide avg	sd	sd	sd	1-peptide	sd
0	0.886664	0.0260818	0.0872546	0	0.894898	0.0300786	0.0750229	0	0.904036	0.0266441	0.0693202	0	0.895199	0.0276015	0.0771992	0.0086899	0.00216358	0.0091631	0.922801	0.0086899
15	0.529418	0.208897	0.261684	15	0.504457	0.239154	0.25639	15	0.495299	0.25579	0.248911	15	0.509725	0.234614	0.255662	0.0176593	0.0237736	0.00641743	0.744338	0.0176593
30	0.313941	0.219299	0.46676	30	0.492705	0.17966	0.327635	30	0.519653	0.169965	0.310381	30	0.4421	0.189642	0.368259	0.111804	0.0261378	0.0857395	0.631741	0.111804
45	0.530694	0.144529	0.324777	45	0.534009	0.13994	0.326051	45	0.420143	0.139082	0.440775	45	0.494949	0.141184	0.363867	0.0648049	0.00292869	0.0666069	0.636133	0.0648049
60	0.553971	0.142309	0.30372	60	0.494553	0.14939	0.356057	60	0.45086	0.117745	0.431395	60	0.499795	0.136481	0.363724	0.051755	0.0166081	0.064182	0.636276	0.051755
120	0.507329	0.151158	0.341513	120	0.45356	0.13604	0.4104	120	0.522558	0.123213	0.354229	120	0.494482	0.136804	0.368714	0.0362483	0.0139883	0.0366565	0.631286	0.0362483
300	0.400902	0.122488	0.47661	300	0.462305	0.115317	0.422378	300	0.472041	0.115027	0.412932	300	0.445083	0.117611	0.437307	0.03857	0.00422627	0.0343638	0.562693	0.03857
420	0.376881	0.126959	0.49616	420	0.399556	0.111907	0.488537	420	0.343434	0.09928	0.557286	420	0.37329	0.112716	0.513994	0.0282324	0.0138573	0.0376846	0.486006	0.0282324
600	0.290556	0.128496	0.580949	600	0.386445	0.0971156	0.51644	600	0.312146	0.0852489	0.602605	600	0.329715	0.10362	0.566665	0.050301	0.0223451	0.0448234	0.433335	0.050301
1200	0.366428	0.043304	0.590268	1200	0.274756	0.0743313	0.650912	1200	0.305954	0.0417432	0.652303	1200	0.315713	0.0531262	0.631161	0.0466086	0.0183807	0.0354213	0.368839	0.0466086
1800	0.369764	0.0115137	0.618722	1800	0.319961	0.0501724	0.629866	1800	0.289744	0.0295157	0.68074	1800	0.32649	0.0304006	0.64311	0.0404075	0.0193445	0.0330621	0.35689	0.0404075

## Sheet: Rpn5-VTENKIF
Time (s)	0	15	45	60	120	300	420	600	1200	1800	0	15	30	45	60	120	300	420	600	1200	1800	0	15	30	45	60	120	300	420	600	1200	1800	Time (s)	f Ub	f Peptide
VTENKIF	Lane 1	Lane 2	Lane 4	Lane 5	Lane 6	Lane 7	Lane 8	Lane 9	Lane 10	Lane 11	Lane 12	Lane 13	Lane 14	Lane 15	Lane 16	Lane 17	Lane 18	Lane 19	Lane 20	Lane 21	Lane 22	Lane 23	Lane 24	Lane 25	Lane 26	Lane 27	Lane 28	Lane 29	Lane 30	Lane 31	Lane 32	Lane 33	0	0.829299	0.154282
	Volume	Volume	Volume	Volume	Volume	Volume	Volume	Volume	Volume	Volume	Volume	Volume	Volume	Volume	Volume	Volume	Volume	Volume	Volume	Volume	Volume	Volume	Volume	Volume	Volume	Volume	Volume	Volume	Volume	Volume	Volume	Volume	15	0.625717	0.256098
Ub n	1.13107e+08	5.49857e+07	3.82422e+07	5.74692e+07	6.38753e+07	3.15611e+07	3.72549e+07	5.01498e+07	4.07309e+07	22281055	1.73348e+08	8.7663e+07	8.9652e+07	4.63449e+07	4.97178e+07	4.42023e+07	3.17651e+07	2.63062e+07	3.41407e+07	3.2081e+07	2.58589e+07	1.56679e+08	9.39177e+07	7.74293e+07	7.1186e+07	5.65216e+07	5.3824e+07	4.82579e+07	4.86473e+07	4.14515e+07	3.45315e+07	2.00229e+07	45	0.466439	0.324432
Naked	2.23929e+06	1.03856e+07	1.7146e+07	1.95688e+07	2.20898e+07	1.44147e+07	1.48709e+07	1.99309e+07	1.11027e+07	1.04594e+06	4.12245e+06	2.02544e+07	3.50373e+07	1.30075e+07	1.38025e+07	1.80825e+07	1.38657e+07	1.47749e+07	1.32775e+07	9.58597e+06	7.50103e+06	3.80218e+06	1.23424e+07	1.40616e+07	1.71775e+07	1.33481e+07	1.68775e+07	1.43237e+07	1.52563e+07	1.42644e+07	9.70142e+06	3.82791e+06	60	0.514602	0.310172
Peptide	2.10422e+07	2.2505e+07	2.65994e+07	3.46391e+07	5.06381e+07	4.47663e+07	5.05624e+07	7.49442e+07	8.47321e+07	6.98383e+07	2.54536e+07	3.05197e+07	5.76771e+07	2.43864e+07	4.08777e+07	3.72943e+07	3.92421e+07	5.64592e+07	7.03941e+07	76765762	7.4232e+07	2.0276e+07	1.98322e+07	22996279	3.21194e+07	1.85211e+07	3.65817e+07	4.48612e+07	6.05011e+07	6.91875e+07	8.80228e+07	7.26764e+07	120	0.467597	0.370695
sum	1.36388e+08	8.78763e+07	8.19876e+07	1.11677e+08	1.36603e+08	9.07422e+07	1.02688e+08	1.45025e+08	1.36566e+08	9.31653e+07	2.02924e+08	1.38437e+08	1.82366e+08	8.37387e+07	1.04398e+08	9.9579e+07	8.48729e+07	9.75403e+07	1.17812e+08	1.18433e+08	1.07592e+08	1.80757e+08	1.26092e+08	1.14487e+08	1.20483e+08	8.83907e+07	1.07283e+08	1.07443e+08	1.24405e+08	1.24903e+08	132255700	9.65272e+07	300	0.347811	0.493336
f Ub	0.829299	0.625717	0.466439	0.514602	0.467597	0.347811	0.362796	0.345801	0.298251	0.239156	0.854251	0.633233	0.491604	0.553446	0.476233	0.443891	0.374267	0.269696	0.289789	0.27088	0.240342	0.866793	0.744833	0.676314	0.590839	0.639451	0.5017	0.44915	0.391041	0.331868	0.261096	0.207433	420	0.362796	0.492388
f Naked	0.0164185	0.118184	0.20913	0.175227	0.161708	0.158854	0.144816	0.137431	0.0812991	0.0112267	0.0203152	0.146308	0.192126	0.155334	0.13221	0.181589	0.16337	0.151474	0.112701	0.0809402	0.0697175	0.0210348	0.0978842	0.122823	0.142572	0.151012	0.157317	0.133315	0.122634	0.114204	0.0733535	0.0396563	600	0.345801	0.516768
f Peptide	0.154282	0.256098	0.324432	0.310172	0.370695	0.493336	0.492388	0.516768	0.62045	0.749617	0.125434	0.220459	0.31627	0.29122	0.391556	0.37452	0.462363	0.578829	0.597511	0.64818	0.68994	0.112173	0.157283	0.200863	0.266589	0.209537	0.340982	0.417536	0.486325	0.553928	0.66555	0.752911	1200	0.298251	0.62045
																																	1800	0.239156	0.749617
																																	0	0.854251	0.125434
																																	15	0.633233	0.220459
																																	30	0.491604	0.31627
																																	45	0.553446	0.29122
																																	60	0.476233	0.391556
																																	120	0.443891	0.37452
																																	300	0.374267	0.462363
																																	420	0.269696	0.578829
																																	600	0.289789	0.597511
																																	1200	0.27088	0.64818
																																	1800	0.240342	0.68994
																																	0	0.866793	0.112173
																																	15	0.744833	0.157283
																																	30	0.676314	0.200863
Time (s)	0	15	45	60	120	300	420	600	1200	1800	0	15	30	45	60	120	300	420	600	1200	1800	0	15	30	45	60	120	300	420	600	1200	1800	45	0.590839	0.266589
VTENKIF	Lane 1	Lane 2	Lane 4	Lane 5	Lane 6	Lane 7	Lane 8	Lane 9	Lane 10	Lane 11	Lane 12	Lane 13	Lane 14	Lane 15	Lane 16	Lane 17	Lane 18	Lane 19	Lane 20	Lane 21	Lane 22	Lane 23	Lane 24	Lane 25	Lane 26	Lane 27	Lane 28	Lane 29	Lane 30	Lane 31	Lane 32	Lane 33	60	0.639451	0.209537
	Volume	Volume	Volume	Volume	Volume	Volume	Volume	Volume	Volume	Volume	Volume	Volume	Volume	Volume	Volume	Volume	Volume	Volume	Volume	Volume	Volume	Volume	Volume	Volume	Volume	Volume	Volume	Volume	Volume	Volume	Volume	Volume	120	0.5017	0.340982
Ub n	1.13107e+08	5.49857e+07	3.82422e+07	5.74692e+07	6.38753e+07	3.15611e+07	3.72549e+07	5.01498e+07	4.07309e+07	22281055	1.73348e+08	8.7663e+07	8.9652e+07	4.63449e+07	4.97178e+07	4.42023e+07	3.17651e+07	2.63062e+07	3.41407e+07	3.2081e+07	2.58589e+07	1.56679e+08	9.39177e+07	7.74293e+07	7.1186e+07	5.65216e+07	5.3824e+07	4.82579e+07	4.86473e+07	4.14515e+07	3.45315e+07	2.00229e+07	300	0.44915	0.417536
Naked	2.23929e+06	1.03856e+07	1.7146e+07	1.95688e+07	2.20898e+07	1.44147e+07	1.48709e+07	1.99309e+07	1.11027e+07	1.04594e+06	4.12245e+06	2.02544e+07	3.50373e+07	1.30075e+07	1.38025e+07	1.80825e+07	1.38657e+07	1.47749e+07	1.32775e+07	9.58597e+06	7.50103e+06	3.80218e+06	1.23424e+07	1.40616e+07	1.71775e+07	1.33481e+07	1.68775e+07	1.43237e+07	1.52563e+07	1.42644e+07	9.70142e+06	3.82791e+06	420	0.391041	0.486325
Peptide	2.10422e+07	2.2505e+07	2.65994e+07	3.46391e+07	5.06381e+07	4.47663e+07	5.05624e+07	7.49442e+07	8.47321e+07	6.98383e+07	2.54536e+07	3.05197e+07	5.76771e+07	2.43864e+07	4.08777e+07	3.72943e+07	3.92421e+07	5.64592e+07	7.03941e+07	76765762	7.4232e+07	2.0276e+07	1.98322e+07	22996279	3.21194e+07	1.85211e+07	3.65817e+07	4.48612e+07	6.05011e+07	6.91875e+07	8.80228e+07	7.26764e+07	600	0.331868	0.553928
sum	1.36388e+08	8.78763e+07	8.19876e+07	1.11677e+08	1.36603e+08	9.07422e+07	1.02688e+08	1.45025e+08	1.36566e+08	9.31653e+07	2.02924e+08	1.38437e+08	1.82366e+08	8.37387e+07	1.04398e+08	9.9579e+07	8.48729e+07	9.75403e+07	1.17812e+08	1.18433e+08	1.07592e+08	1.80757e+08	1.26092e+08	1.14487e+08	1.20483e+08	8.83907e+07	1.07283e+08	1.07443e+08	1.24405e+08	1.24903e+08	132255700	9.65272e+07	1200	0.261096	0.66555
f Ub	0.829299	0.625717	0.466439	0.514602	0.467597	0.347811	0.362796	0.345801	0.298251	0.239156	0.854251	0.633233	0.491604	0.553446	0.476233	0.443891	0.374267	0.269696	0.289789	0.27088	0.240342	0.866793	0.744833	0.676314	0.590839	0.639451	0.5017	0.44915	0.391041	0.331868	0.261096	0.207433	1800	0.207433	0.752911
f Naked	0.0164185	0.118184	0.20913	0.175227	0.161708	0.158854	0.144816	0.137431	0.0812991	0.0112267	0.0203152	0.146308	0.192126	0.155334	0.13221	0.181589	0.16337	0.151474	0.112701	0.0809402	0.0697175	0.0210348	0.0978842	0.122823	0.142572	0.151012	0.157317	0.133315	0.122634	0.114204	0.0733535	0.0396563
f Peptide	0.154282	0.256098	0.324432	0.310172	0.370695	0.493336	0.492388	0.516768	0.62045	0.749617	0.125434	0.220459	0.31627	0.29122	0.391556	0.37452	0.462363	0.578829	0.597511	0.64818	0.68994	0.112173	0.157283	0.200863	0.266589	0.209537	0.340982	0.417536	0.486325	0.553928	0.66555	0.752911
Time (s)	f Ub	f Naked	f Peptide	Time (s)	f Ub	f Naked	f Peptide	Time (s)	f Ub	f Naked	f Peptide	Time (s)	f Ub avg	f Naked avg	f Peptide avg	sd	sd	sd	1-peptide	sd
0	0.829299	0.0164185	0.154282	0	0.854251	0.0203152	0.125434	0	0.866793	0.0210348	0.112173	0	0.850114	0.0192562	0.13063	0.0190858	0.00248366	0.0215301	0.86937	0.0190858
15	0.625717	0.118184	0.256098	15	0.633233	0.146308	0.220459	15	0.744833	0.0978842	0.157283	15	0.667928	0.120792	0.21128	0.0667075	0.0243169	0.0500429	0.78872	0.0667075
				30	0.491604	0.192126	0.31627	30	0.676314	0.122823	0.200863	30	0.583959	0.157474	0.258567	0.13061	0.0490048	0.081605	0.741433	0.13061
45	0.466439	0.20913	0.324432	45	0.553446	0.155334	0.29122	45	0.590839	0.142572	0.266589	45	0.536908	0.169012	0.29408	0.0638279	0.0353241	0.0290273	0.70592	0.0638279
60	0.514602	0.175227	0.310172	60	0.476233	0.13221	0.391556	60	0.639451	0.151012	0.209537	60	0.543429	0.152816	0.303755	0.0853421	0.0215649	0.0911792	0.696245	0.0853421
120	0.467597	0.161708	0.370695	120	0.443891	0.181589	0.37452	120	0.5017	0.157317	0.340982	120	0.471063	0.166871	0.362066	0.0290598	0.0129335	0.0183585	0.637934	0.0290598
300	0.347811	0.158854	0.493336	300	0.374267	0.16337	0.462363	300	0.44915	0.133315	0.417536	300	0.390409	0.151846	0.457745	0.0525626	0.0162068	0.0381104	0.542255	0.0525626
420	0.362796	0.144816	0.492388	420	0.269696	0.151474	0.578829	420	0.391041	0.122634	0.486325	420	0.341178	0.139642	0.519181	0.0634952	0.0151004	0.051746	0.480819	0.0634952
600	0.345801	0.137431	0.516768	600	0.289789	0.112701	0.597511	600	0.331868	0.114204	0.553928	600	0.322486	0.121445	0.556069	0.0291611	0.0138646	0.0404139	0.443931	0.0291611
1200	0.298251	0.0812991	0.62045	1200	0.27088	0.0809402	0.64818	1200	0.261096	0.0733535	0.66555	1200	0.276742	0.0785309	0.644727	0.0192589	0.00448738	0.0227478	0.355273	0.0192589
1800	0.239156	0.0112267	0.749617	1800	0.240342	0.0697175	0.68994	1800	0.207433	0.0396563	0.752911	1800	0.228977	0.0402001	0.730823	0.0186672	0.0292492	0.0354435	0.269177	0.0186672

## Sheet: Rpt6-EQ
Time (s)	0	15	30	45	60	120	300	420	600	1200	1800	0	15	30	45	60	120	300	420	600	1200	1800	0	15	30	45	60	120	300	420	600	1200	1800		Time (s)	f Ub	f Peptide
EQ6	Lane 1	Lane 1 (2)	Lane 1 (3)	Lane 1 (4)	Lane 1 (5)	Lane 1 (6)	Lane 1 (7)	Lane 1 (8)	Lane 1 (9)	Lane 2 (10)	Lane 3 (11)	Lane 6 (12)	Lane 7 (13)	Lane 8 (14)	Lane 9 (15)	Lane 10 (16)	Lane 11 (17)	Lane 12 (18)	Lane 13 (19)	Lane 14 (20)	Lane 15 (21)	Lane 16 (22)	Lane 21 (23)	Lane 22 (24)	Lane 23 (25)	Lane 24 (26)	Lane 25 (27)	Lane 26 (28)	Lane 27 (29)	Lane 28 (30)	Lane 29 (31)	Lane 30 (32)	Lane 31 (33)		0	0.918672	0.0601484
	Volume	Volume	Volume	Volume	Volume	Volume	Volume	Volume	Volume	Volume	Volume	Volume	Volume	Volume	Volume	Volume	Volume	Volume	Volume	Volume	Volume	Volume	Volume	Volume	Volume	Volume	Volume	Volume	Volume	Volume	Volume	Volume	Volume		15	0.626389	0.227437
Ub n	1.85951e+08	1.0885e+08	7.0455e+07	5.6114e+07	5.87795e+07	7.59061e+07	5.73631e+07	2.74551e+07	3.26068e+07	3.75165e+07	3.4563e+07	1.42892e+08	1.11277e+08	5.53161e+07	8.12864e+07	6.54319e+07	6.28652e+07	8.72445e+07	8.27853e+07	5.98961e+07	6.01988e+07	7.10125e+07	1.11677e+08	7.33027e+07	5.10432e+07	4.48953e+07	3.75855e+07	5.05032e+07	4.41474e+07	3.92564e+07	9.27951e+07	42073184	2.81729e+07		30	0.461045	0.402186
Naked	4.28707e+06	2.54012e+07	2.09005e+07	9.80134e+06	5.1584e+06	3.21125e+06	3.40417e+06	1.06822e+07	4.57329e+06	2.97558e+06	1.33886e+06	3.37616e+06	3.38235e+07	6.98331e+06	7.70254e+06	8.19434e+06	6.21662e+06	6.28186e+06	5.67504e+06	1.17235e+06	816242	845977	5.69295e+06	2.60007e+07	2.22696e+07	11351139	7.96415e+06	1.08606e+07	1.68783e+07	8.73925e+06	4.71528e+06	2.61649e+06	238271		45	0.508892	0.40222
Peptide	1.21748e+07	3.95226e+07	6.14604e+07	4.43516e+07	5.73096e+07	8.12562e+07	7.98313e+07	8.35853e+07	9.32474e+07	1.23717e+08	1.01796e+08	1.4395e+07	5.75518e+07	2.30952e+07	4.61161e+07	5.65714e+07	6.02487e+07	7.28506e+07	9.34989e+07	7.08346e+07	7.77942e+07	1.04038e+08	1.25007e+07	4.0739e+07	7.16333e+07	4.87987e+07	4.65737e+07	6.52335e+07	7.58917e+07	8.37337e+07	6.82109e+07	9.73833e+07	8.02944e+07		60	0.484789	0.472666
sum	2.02413e+08	1.73774e+08	1.52816e+08	1.10267e+08	1.21248e+08	1.60374e+08	1.40599e+08	1.21723e+08	1.30427e+08	1.64209e+08	1.37697e+08	1.60663e+08	2.02652e+08	8.53945e+07	1.35105e+08	1.30198e+08	1.2933e+08	1.66377e+08	1.81959e+08	1.31903e+08	1.38809e+08	1.75896e+08	1.29871e+08	1.40042e+08	1.44946e+08	1.05045e+08	9.21234e+07	1.26597e+08	1.36917e+08	1.31729e+08	1.65721e+08	1.42073e+08	1.08706e+08		120	0.473308	0.506668
f Ub	0.918672	0.626389	0.461045	0.508892	0.484789	0.473308	0.407992	0.225555	0.249999	0.228468	0.251007	0.889389	0.549102	0.647771	0.601653	0.502558	0.486082	0.524378	0.454966	0.454092	0.43368	0.403718	0.85991	0.523432	0.352153	0.427391	0.407991	0.398928	0.322438	0.298008	0.559947	0.296138	0.259167		300	0.407992	0.567796
f Naked	0.0211799	0.146174	0.136769	0.0888873	0.0425444	0.0200236	0.024212	0.0877583	0.0350639	0.0181207	0.00972322	0.0210139	0.166904	0.0817769	0.0570115	0.0629377	0.0480677	0.0377568	0.0311885	0.00888798	0.00588032	0.00480952	0.0438354	0.185663	0.15364	0.10806	0.0864509	0.0857883	0.123274	0.0663425	0.0284531	0.0184165	0.00219189		420	0.225555	0.686687
f Peptide	0.0601484	0.227437	0.402186	0.40222	0.472666	0.506668	0.567796	0.686687	0.714937	0.753411	0.73927	0.0895975	0.283993	0.270452	0.341335	0.434504	0.465851	0.437865	0.513845	0.53702	0.56044	0.591472	0.0962547	0.290905	0.494207	0.46455	0.505558	0.515284	0.554288	0.63565	0.4116	0.685446	0.738641		600	0.249999	0.714937
																																			1200	0.228468	0.753411
																																			1800	0.251007	0.73927
																																			0	0.889389	0.0895975
																																			15	0.549102	0.283993
																																			30	0.647771	0.270452
																																			45	0.601653	0.341335
																																			60	0.502558	0.434504
																																			120	0.486082	0.465851
																																			300	0.524378	0.437865
																																			420	0.454966	0.513845
																																			600	0.454092	0.53702
																																			1200	0.43368	0.56044
																																			1800	0.403718	0.591472
																																			0	0.85991	0.0962547
																																			15	0.523432	0.290905
Time (s)	0	15	30	45	60	120	300	420	600	1200	1800	0	15	30	45	60	120	300	420	600	1200	1800	0	15	30	45	60	120	300	420	600	1200	1800		30	0.352153	0.494207
EQ6	Lane 1	Lane 1 (2)	Lane 1 (3)	Lane 1 (4)	Lane 1 (5)	Lane 1 (6)	Lane 1 (7)	Lane 1 (8)	Lane 1 (9)	Lane 2 (10)	Lane 3 (11)	Lane 6 (12)	Lane 7 (13)	Lane 8 (14)	Lane 9 (15)	Lane 10 (16)	Lane 11 (17)	Lane 12 (18)	Lane 13 (19)	Lane 14 (20)	Lane 15 (21)	Lane 16 (22)	Lane 21 (23)	Lane 22 (24)	Lane 23 (25)	Lane 24 (26)	Lane 25 (27)	Lane 26 (28)	Lane 27 (29)	Lane 28 (30)	Lane 29 (31)	Lane 30 (32)	Lane 31 (33)		45	0.427391	0.46455
	Volume	Volume	Volume	Volume	Volume	Volume	Volume	Volume	Volume	Volume	Volume	Volume	Volume	Volume	Volume	Volume	Volume	Volume	Volume	Volume	Volume	Volume	Volume	Volume	Volume	Volume	Volume	Volume	Volume	Volume	Volume	Volume	Volume		60	0.407991	0.505558
Ub n	1.85951e+08	1.0885e+08	7.0455e+07	5.6114e+07	5.87795e+07	7.59061e+07	5.73631e+07	2.74551e+07	3.26068e+07	3.75165e+07	3.4563e+07	1.42892e+08	1.11277e+08	5.53161e+07	8.12864e+07	6.54319e+07	6.28652e+07	8.72445e+07	8.27853e+07	5.98961e+07	6.01988e+07	7.10125e+07	1.11677e+08	7.33027e+07	5.10432e+07	4.48953e+07	3.75855e+07	5.05032e+07	4.41474e+07	3.92564e+07	9.27951e+07	42073184	2.81729e+07		120	0.398928	0.515284
Naked	4.28707e+06	2.54012e+07	2.09005e+07	9.80134e+06	5.1584e+06	3.21125e+06	3.40417e+06	1.06822e+07	4.57329e+06	2.97558e+06	1.33886e+06	3.37616e+06	3.38235e+07	6.98331e+06	7.70254e+06	8.19434e+06	6.21662e+06	6.28186e+06	5.67504e+06	1.17235e+06	816242	845977	5.69295e+06	2.60007e+07	2.22696e+07	11351139	7.96415e+06	1.08606e+07	1.68783e+07	8.73925e+06	4.71528e+06	2.61649e+06	238271		300	0.322438	0.554288
Peptide	1.21748e+07	3.95226e+07	6.14604e+07	4.43516e+07	5.73096e+07	8.12562e+07	7.98313e+07	8.35853e+07	9.32474e+07	1.23717e+08	1.01796e+08	1.4395e+07	5.75518e+07	2.30952e+07	4.61161e+07	5.65714e+07	6.02487e+07	7.28506e+07	9.34989e+07	7.08346e+07	7.77942e+07	1.04038e+08	1.25007e+07	4.0739e+07	7.16333e+07	4.87987e+07	4.65737e+07	6.52335e+07	7.58917e+07	8.37337e+07	6.82109e+07	9.73833e+07	8.02944e+07		420	0.298008	0.63565
sum	2.02413e+08	1.73774e+08	1.52816e+08	1.10267e+08	1.21248e+08	1.60374e+08	1.40599e+08	1.21723e+08	1.30427e+08	1.64209e+08	1.37697e+08	1.60663e+08	2.02652e+08	8.53945e+07	1.35105e+08	1.30198e+08	1.2933e+08	1.66377e+08	1.81959e+08	1.31903e+08	1.38809e+08	1.75896e+08	1.29871e+08	1.40042e+08	1.44946e+08	1.05045e+08	9.21234e+07	1.26597e+08	1.36917e+08	1.31729e+08	1.65721e+08	1.42073e+08	1.08706e+08		600	0.559947	0.4116
f Ub	0.918672	0.626389	0.461045	0.508892	0.484789	0.473308	0.407992	0.225555	0.249999	0.228468	0.251007	0.889389	0.549102	0.647771	0.601653	0.502558	0.486082	0.524378	0.454966	0.454092	0.43368	0.403718	0.85991	0.523432	0.352153	0.427391	0.407991	0.398928	0.322438	0.298008	0.559947	0.296138	0.259167		1200	0.296138	0.685446
f Naked	0.0211799	0.146174	0.136769	0.0888873	0.0425444	0.0200236	0.024212	0.0877583	0.0350639	0.0181207	0.00972322	0.0210139	0.166904	0.0817769	0.0570115	0.0629377	0.0480677	0.0377568	0.0311885	0.00888798	0.00588032	0.00480952	0.0438354	0.185663	0.15364	0.10806	0.0864509	0.0857883	0.123274	0.0663425	0.0284531	0.0184165	0.00219189		1800	0.259167	0.738641
f Peptide	0.0601484	0.227437	0.402186	0.40222	0.472666	0.506668	0.567796	0.686687	0.714937	0.753411	0.73927	0.0895975	0.283993	0.270452	0.341335	0.434504	0.465851	0.437865	0.513845	0.53702	0.56044	0.591472	0.0962547	0.290905	0.494207	0.46455	0.505558	0.515284	0.554288	0.63565	0.4116	0.685446	0.738641
Time (s)	f Ub	f Naked	f Peptide	Time (s)	f Ub	f Naked	f Peptide	Time (s)	f Ub	f Naked	f Peptide	Time (s)	f Ub avg	f Naked avg	f Peptide avg	sd	sd	sd	1-peptide	sd
0	0.918672	0.0211799	0.0601484	0	0.889389	0.0210139	0.0895975	0	0.85991	0.0438354	0.0962547	0	0.889323	0.0286764	0.0820002	0.029381	0.0131284	0.0192147	0.918	0.029381
15	0.626389	0.146174	0.227437	15	0.549102	0.166904	0.283993	15	0.523432	0.185663	0.290905	15	0.566308	0.166247	0.267445	0.0535916	0.0197528	0.0348199	0.732555	0.0535916
30	0.461045	0.136769	0.402186	30	0.647771	0.0817769	0.270452	30	0.352153	0.15364	0.494207	30	0.48699	0.124062	0.388948	0.149507	0.0375791	0.112463	0.611052	0.149507
45	0.508892	0.0888873	0.40222	45	0.601653	0.0570115	0.341335	45	0.427391	0.10806	0.46455	45	0.512645	0.0846528	0.402702	0.0871919	0.0257862	0.0616087	0.597298	0.0871919
60	0.484789	0.0425444	0.472666	60	0.502558	0.0629377	0.434504	60	0.407991	0.0864509	0.505558	60	0.465113	0.0639777	0.470909	0.0502603	0.0219717	0.0355594	0.529091	0.0502603
120	0.473308	0.0200236	0.506668	120	0.486082	0.0480677	0.465851	120	0.398928	0.0857883	0.515284	120	0.452773	0.0512932	0.495934	0.0470662	0.0330008	0.0264069	0.504066	0.0470662
300	0.407992	0.024212	0.567796	300	0.524378	0.0377568	0.437865	300	0.322438	0.123274	0.554288	300	0.41827	0.0617474	0.519983	0.101362	0.0537118	0.0714364	0.480017	0.101362
420	0.225555	0.0877583	0.686687	420	0.454966	0.0311885	0.513845	420	0.298008	0.0663425	0.63565	420	0.326176	0.0617631	0.612061	0.117271	0.0285615	0.0888026	0.387939	0.117271
600	0.249999	0.0350639	0.714937	600	0.454092	0.00888798	0.53702	600	0.559947	0.0284531	0.4116	600	0.421346	0.024135	0.554519	0.157547	0.0136117	0.152424	0.445481	0.157547
1200	0.228468	0.0181207	0.753411	1200	0.43368	0.00588032	0.56044	1200	0.296138	0.0184165	0.685446	1200	0.319429	0.0141392	0.666432	0.10457	0.0071539	0.0978806	0.333568	0.10457
1800	0.251007	0.00972322	0.73927	1800	0.403718	0.00480952	0.591472	1800	0.259167	0.00219189	0.738641	1800	0.304631	0.00557488	0.689794	0.0859092	0.00382355	0.08515	0.310206	0.0859092
