# Supplementary material for: Specific lid-base contacts in the 26s proteasome control the conformational switching required for substrate degradation
Source: eLife journal article supplement (doi:10.7554/elife.49806), 2019-11-28
Supplement: fig5-figsupp2-data1 [file Single turnover and Restart Data Gel Quantitation and Analysis.xlsx]

## Sheet: Raw and Calculated Values
	180504 Wild-type single turnover 1
	Lane 1	Lane 2	Lane 3	Lane 4	Lane 5	Lane 6	Lane 7	Lane 8	Lane 9	Lane 10	Lane 11	Lane 12
	Volume	Volume	Volume	Volume	Volume	Volume	Volume	Volume	Volume	Volume	Volume	Volume
	221709129	260818916	218656090	205827105	136559099	164476449	118253424	129386091	123552589	127287424	124791420	119750562
	11833965	14602822	16584457	16473535	8551559	17455830	15512060	18438186	20374522	23346606	22038402	20169241
	43622089	38245805	75610694	103097680	112395564	164309446	199092485	231098839	260887515	245296135	260956340	218905693
Sum	277165183	313667543	310851241	325398320	257506222	346241725	332857969	378923116	404814626	395930165	407786162	358825496
Time	0	10	20	30	45	60	120	300	600	1200	1800
F ub WT ST 1	0.799917	0.831514	0.703411	0.632539	0.530314	0.475034	0.355267	0.341457	0.305208	0.32149	0.306022	0.333729
F nake WT ST 1	0.0426964	0.0465551	0.0533517	0.0506258	0.0332091	0.0504152	0.0466026	0.0486594	0.0503305	0.0589665	0.054044	0.0562091
F peptide WT ST 1	0.157387	0.121931	0.243238	0.316835	0.436477	0.474551	0.59813	0.609883	0.644462	0.619544	0.639934	0.610062
	180504 wld-type single turnover 2
	Lane 13	Lane 14	Lane 15	Lane 16	Lane 17	Lane 18	Lane 19	Lane 20	Lane 21	Lane 22	Lane 23	Lane 24
	Volume	Volume	Volume	Volume	Volume	Volume	Volume	Volume	Volume	Volume	Volume	Volume
	166839880	266220004	221664725	200755709	149272017	131019510	102621578	91624559	83754602	121624333	115122639	77982674
	9603872	12443264	13173234	13529571	9990439	10592656	11292684	15039416	16100260	14179287	17687599	11520059
	38609768	34260374	68209264	88174970	98525561	108777533	144147860	168880490	182769936	184895909	198683465	168933375
Sum	215053520	312923642	303047223	302460250	257788017	250389699	258062122	275544465	282624798	320699529	331493703	258436108
Time	0	10	20	30	45	60	120	300	600	1200	1800
F ub WT ST 2	0.775806	0.850751	0.731453	0.663742	0.579049	0.523262	0.397662	0.332522	0.296346	0.379247	0.347285	0.301748
F nake WT ST 2	0.0446581	0.0397645	0.0434692	0.0447317	0.0387545	0.0423047	0.0437596	0.0545807	0.0569669	0.0442136	0.0533573	0.044576
F peptide WT ST 2	0.179536	0.109485	0.225078	0.291526	0.382196	0.434433	0.558578	0.612897	0.646688	0.576539	0.599358	0.653676
	180504 wild-type single turnover 3
	Lane 25	Lane 26	Lane 27	Lane 28	Lane 29	Lane 30	Lane 31	Lane 32	Lane 33	Lane 34	Lane 35	Lane 36
	Volume	Volume	Volume	Volume	Volume	Volume	Volume	Volume	Volume	Volume	Volume	Volume
	118073008	242182915	200517619	179456902	135056003	107909709	84452468	67842982	76036047	79173611	73308626	54695045
	8502372	14346284	13193922	14985559	9703212	7457481	9372810	7729973	8784815	10512554	10227115	10730643
	24081085	31165522	66395603	89916996	96265030	93504652	117842199	130811108	144961112	139474537	158808296	132772764
Sum	150656465	287694721	280107144	284359457	241024245	208871842	211667477	206384063	229781974	229160702	242344037	198198452
Time	0	10	20	30	45	60	120	300	600	1200	1800
F ub WT ST 3	0.783723	0.841805	0.71586	0.631092	0.560342	0.516631	0.398987	0.328722	0.330905	0.345494	0.302498	0.275961
F nake WT ST 3	0.0564355	0.0498663	0.0471031	0.0526994	0.0402582	0.0357036	0.0442808	0.0374543	0.0382311	0.0458742	0.0422008	0.0541409
F peptide WT ST 3	0.159841	0.108328	0.237036	0.316209	0.3994	0.447665	0.556733	0.633824	0.630864	0.608632	0.655301	0.669898
	180503 Rpn5-VTENKIF single turnover 1
	Lane 1	Lane 2	Lane 3	Lane 4	Lane 5	Lane 6	Lane 7	Lane 8	Lane 9	Lane 10	Lane 11	Lane 12
	Volume	Volume	Volume	Volume	Volume	Volume	Volume	Volume	Volume	Volume	Volume	Volume
	292458250	227551583	274311860	261542530	244848947	239378275	217777871	207645989	169938717	159345572	141534922	92052462
	12022661	12101081	21081161	20938884	24024793	32160373	36488384	52917487	60040926	66255752	67729905	34827571
	56081129	55073834	57177889	76928985	87716818	119615961	149956238	168121224	178165656	197704038	220950021	209385202
Sum	360562040	294726498	352570910	359410399	356590558	391154609	404222493	428684700	408145299	423305362	430214848	336265235
Time	0	30	60	120	180	300	420	600	900	1200	1800
F ub VTENKIF ST 1	0.811118	0.772077	0.778033	0.727699	0.686639	0.611979	0.538757	0.484379	0.416368	0.376432	0.328987	0.27375
F naked VTENKIF ST 1	0.0333442	0.0410587	0.0597927	0.058259	0.0673736	0.0822191	0.0902681	0.123442	0.147107	0.15652	0.157433	0.103572
F peptide VTENKIF ST 1	0.155538	0.186864	0.162174	0.214042	0.245987	0.305802	0.370975	0.392179	0.436525	0.467048	0.513581	0.622679
	180503 Rpn5-VTENKIF single turnover 2
	Lane 13	Lane 14	Lane 15	Lane 16	Lane 17	Lane 18	Lane 19	Lane 20	Lane 21	Lane 22	Lane 23	Lane 24
	Volume	Volume	Volume	Volume	Volume	Volume	Volume	Volume	Volume	Volume	Volume	Volume
	226435376	282305571	261878463	225304492	173285633	162510908	146358810	134448243	120063476	111252971	96338418	59166266
	16786095	20574392	19865552	17526423	16318362	21327778	26443480	34163390	40058123	44983315	43316716	22359420
	33193245	38172668	45904240	58267222	59621095	86251488	97958487	114525427	131167994	141047812	158750586	168132357
Sum	276414716	341052631	327648255	301098137	249225090	270090174	270760777	283137060	291289593	297284098	298405720	249658043
Time	0	30	60	120	180	300	420	600	900	1200	1800
F ub VTENKIF ST 2	0.819187	0.827748	0.799267	0.748276	0.695298	0.601691	0.540547	0.474852	0.412179	0.374231	0.322844	0.236989
F naked VTENKIF ST 2	0.0607279	0.0603261	0.0606307	0.0582083	0.0654764	0.0789654	0.0976636	0.12066	0.13752	0.151314	0.14516	0.0895602
F peptide VTENKIF ST 2	0.120085	0.111926	0.140102	0.193516	0.239226	0.319343	0.36179	0.404488	0.450301	0.474455	0.531996	0.673451
	180503 Rpn5-VTENKIF Single Turnover 3
	Lane 1	Lane 2	Lane 3	Lane 4	Lane 5	Lane 6	Lane 7	Lane 8	Lane 9	Lane 10	Lane 11	Lane 12
	Volume	Volume	Volume	Volume	Volume	Volume	Volume	Volume	Volume	Volume	Volume	Volume
	113745843	143729445	129196361	116651822	95527228	70048308	60011920	53626996	42682245	39831437	31154140	21130000
	3527754	3696874	4447147	6656706	9111846	10109753	10929893	16352563	20510692	25845935	26315752	11198971
	11600244	11986063	18152538	28760873	32974175	43515932	50832512	65573182	71293639	90345306	99163819	97082249
Sum	128873841	159412382	151796046	152069401	137613249	123673993	121774325	135552741	134486576	156022678	156633711	129411220
Time	0	30	60	120	180	300	420	600	900	1200	1800
F ub VTENKIF ST 3	0.882614	0.90162	0.851118	0.767096	0.694172	0.566395	0.492813	0.395617	0.317372	0.255293	0.198898	0.163278
F naked VTENKIF ST 3	0.0273737	0.0231906	0.0292969	0.0437741	0.0662134	0.0817452	0.0897553	0.120636	0.152511	0.165655	0.168008	0.0865379
F peptide VTENKIF ST 3	0.0900124	0.075189	0.119585	0.18913	0.239615	0.35186	0.417432	0.483747	0.530117	0.579052	0.633094	0.750184
	180515 Wild-type Restart 1
	Lane 1	Lane 2	Lane 3	Lane 4	Lane 5	Lane 6	Lane 7	Lane 8	Lane 9	Lane 10	Lane 11
	Volume	Volume	Volume	Volume	Volume	Volume	Volume	Volume	Volume	Volume	Volume
	407963979	318762754	367924848	291361832	249699574	230449483	197689489	176531144	142540228	130473297	120364200
	15293411	14662524	19753391	11020734	13582402	17254070	17862223	18915055	21166096	22266096	20964685
	61174710	91112293	127427639	134347165	167229064	212921721	229601705	289494228	314701676	324874403	309167200
Sum	484432100	424537571	515105878	436729731	430511040	460625274	445153417	484940427	478408000	477613796	450496085
Time	-180	0	10	20	30	45	60	120	300	600	1200
WT restart F ub 1	0.842149	0.750847	0.71427	0.667144	0.580007	0.500297	0.444093	0.364026	0.297947	0.273177	0.267181
WT restart F naked 1	0.0315698	0.0345376	0.0383482	0.0252347	0.0315495	0.0374579	0.040126	0.0390049	0.0442428	0.0466195	0.0465369
WT restart F peptide 1	0.126281	0.214615	0.247381	0.307621	0.388443	0.462245	0.515781	0.596969	0.65781	0.680203	0.686282
	180515 Rpn5-VTENKIF Restart 3
	Lane 15	Lane 14	Lane 15	Lane 16	Lane 17	Lane 18	Lane 19	Lane 20	Lane 21	Lane 22	Lane 23
	Volume	Volume	Volume	Volume	Volume	Volume	Volume	Volume	Volume	Volume	Volume
	396042962	303433416	296568033	300838271	261568633	254241570	251879495	254488586	233100319	229525978	188008776
	13995252	12186323	11202768	12175553	10295488	11422347	12270160	13965865	16626015	18725727	17106124
	44859066	45495938	47485254	53680955	53390886	61381526	68328195	95028855	94580061	95841403	89750341
Sum	454897280	361115677	355256055	366694779	325255007	327045443	332477850	363483306	344306395	344093108	294865241
Time	-180	0	10	20	30	45	60	120	300	600	1200
VTENKIF restart F ub 3	0.870621	0.840267	0.834801	0.820405	0.804196	0.777389	0.757583	0.700138	0.677014	0.667046	0.637609
VTENKIF restart F naked 3	0.0307657	0.0337463	0.0315343	0.0332035	0.0316536	0.0349259	0.0369052	0.0384223	0.0482884	0.0544205	0.0580134
VTENKIF restart F peptide 3	0.0986136	0.125987	0.133665	0.146391	0.164151	0.187685	0.205512	0.261439	0.274697	0.278533	0.304377
	180515 Wild-type Restart 2
	Lane 1	Lane 2	Lane 3	Lane 4	Lane 5	Lane 6	Lane 7	Lane 8	Lane 9	Lane 10	Lane 11
	Volume	Volume	Volume	Volume	Volume	Volume	Volume	Volume	Volume	Volume	Volume
	644769058	504730085	508610649	461816611	406903471	348439379	328800903	279024635	270609101	251061272	241800714
	32240688	27601957	29740447	21415682	25115277	31031735	26789536	27362731	31295066	31763776	33106976
	125579284	160107437	196954458	229023047	271380057	293043669	336354291	412664371	524242127	528723710	528033761
Sum	802589030	692439479	735305554	712255340	703398805	672514783	691944730	719051737	826146294	811548758	802941451
Time	-180	0	10	20	30	45	60	120	300	600	1200
WT restart F ub 3	0.803361	0.728916	0.6917	0.648386	0.578482	0.518114	0.475184	0.388045	0.327556	0.309361	0.301144
WT restart F naked 3	0.0401709	0.0398619	0.0404464	0.0300674	0.0357056	0.0461428	0.0387163	0.0380539	0.0378808	0.0391397	0.0412321
WT restart F peptide 3	0.156468	0.231222	0.267854	0.321546	0.385813	0.435743	0.4861	0.573901	0.634563	0.6515	0.657624
	180515 Wild-type Restart 3
	Lane 13	Lane 14	Lane 15	Lane 16	Lane 17	Lane 18	Lane 19	Lane 20	Lane 21	Lane 22	Lane 23
	Volume	Volume	Volume	Volume	Volume	Volume	Volume	Volume	Volume	Volume	Volume
	572765044	432553400	439019724	375371198	301601337	278448949	272333831	232861798	237174257	281415538	247184905
	27097080	18518705	21790775	23452416	18922384	17817076	22478584	18030350	23735056	29197176	25990250
	105175119	150536875	165022461	190773083	200496343	243771124	278787223	318591596	372649462	594273881	344293718
Sum	705037243	601608980	625832960	589596697	521020064	540037149	573599638	569483744	633558775	904886595	617468873
Time	-180	0	10	20	30	45	60	120	300	600	1200
WT F ub restart 3	0.81239	0.718994	0.701497	0.636658	0.578867	0.515611	0.47478	0.4089	0.374352	0.310995	0.40032
WT F naked restart 3	0.0384335	0.030782	0.0348188	0.039777	0.036318	0.0329923	0.0391886	0.0316609	0.0374631	0.0322661	0.0420916
WT F peptide restart 3	0.149177	0.250224	0.263685	0.323565	0.384815	0.451397	0.486031	0.559439	0.588185	0.656739	0.557589
	180515 Rpn5-VTENKIF Restart 1
	Lane 24	Lane 25	Lane 26	Lane 27	Lane 28	Lane 29	Lane 30	Lane 31	Lane 32	Lane 33	Lane 34
	Volume	Volume	Volume	Volume	Volume	Volume	Volume	Volume	Volume	Volume	Volume
	348389210	299190355	372642632	309746961	321741446	278818132	324524662	241720179	275187851	283719484	242773073
	19887009	15650098	21355802	13443993	16254232	12878977	19024585	17696716	27600727	29350691	24486783
	61226556	62344521	70858600	58322085	66572246	72088957	96279768	88756756	111509202	134311285	130941424
Sum	429502775	377184974	464857034	381513039	404567924	363786066	439829015	348173651	414297780	447381460	398201280
Time	-180	0	10	20	30	45	60	120	300	600	1200
VTENKIF F ub restart 2	0.811145	0.793219	0.801628	0.811891	0.795272	0.766434	0.737843	0.694252	0.664227	0.634178	0.609674
VTENKIF F naked restart 2	0.0463024	0.0414918	0.0459406	0.0352386	0.0401768	0.0354026	0.0432545	0.0508273	0.0666205	0.0656055	0.0614935
VTENKIF F peptide restart 2	0.142552	0.165289	0.152431	0.15287	0.164551	0.198163	0.218903	0.254921	0.269152	0.300216	0.328832
	180515 Rpn5-VTENKIF Restart 2
	Lane 35	Lane 36	Lane 37	Lane 38	Lane 39	Lane 40	Lane 41	Lane 42	Lane 43	Lane 44	Lane 45
	Volume	Volume	Volume	Volume	Volume	Volume	Volume	Volume	Volume	Volume	Volume
	465020885	277090561	311148039	293466074	275915413	246248964	281070189	234627496	235745189	256068658	214411291
	25669884	23411291	19833158	19468377	15951439	15204476	21669113	20326002	23486788	28438500	33368236
	57250070	62123702	55320855	62953580	78997533	63409215	80197648	85235459	99570645	116477187	104413348
Sum	547940839	362625554	386302052	375888031	370864385	324862655	382936950	340188957	358802622	400984345	352192875
Time	-180	0	10	20	30	45	60	120	300	600	1200
VTENKIF F ub restart 3	0.84867	0.764123	0.805453	0.780727	0.743979	0.758009	0.733986	0.689698	0.657033	0.6386	0.608789
VTENKIF F naked restart 3	0.0468479	0.0645605	0.0513411	0.051793	0.0430115	0.0468028	0.0565866	0.0597492	0.0654588	0.0709217	0.0947442
VTENKIF F peptide restart 3	0.104482	0.171316	0.143206	0.16748	0.213009	0.195188	0.209428	0.250553	0.277508	0.290478	0.296466
180611	Wild-type Single Turnover
	Lane 1	Lane 2	Lane 3	Lane 4	Lane 5	Lane 6	Lane 7	Lane 8	Lane 9	Lane 10	Lane 11
	Volume	Volume	Volume	Volume	Volume	Volume	Volume	Volume	Volume	Volume	Volume
	162244553	170516006	91373295	77117627	86920723	76274621	64462026	80521860	65555205	58791422	57558027
	5297809	5322372	4124580	3396596	4030439	4459248	5458933	9303322	8667686	7760383	8584217
	17716218	22404925	29493421	34406056	52367093	63164525	77313269	127135865	145844034	154311551	151855079
Time	0	10	20	30	45	60	120	300	600	1200	1800
Sum	185258580	198243303	124991296	114920279	143318255	143898394	147234228	216961047	220066925	220863356	217997323
F ub	0.875773	0.860135	0.731037	0.671053	0.606487	0.530059	0.43782	0.371135	0.297888	0.266189	0.264031
F naked	0.0285968	0.0268477	0.0329989	0.0295561	0.0281223	0.0309889	0.0370765	0.0428801	0.0393866	0.0351366	0.0393776
F peptide	0.0956297	0.113017	0.235964	0.299391	0.36539	0.438952	0.525104	0.585985	0.662726	0.698674	0.696591
	Lane 12	Lane 13	Lane 14	Lane 15	Lane 16	Lane 17	Lane 18	Lane 19	Lane 20	Lane 21	Lane 22
	Volume	Volume	Volume	Volume	Volume	Volume	Volume	Volume	Volume	Volume	Volume
	109560835	92790194	82842634	77884826	88204171	79835582	58376866	48581812	52599311	48250925	44377946
	3792260	5371687	3622234	4238657	4503506	4194718	5107602	5628263	5881146	5375935	5735237
	13709572	18015826	26583501	33679266	50368297	56930361	75739892	91261950	113472772	115714214	108965617
Time	0	10	20	30	45	60	120	300	600	1200	1800
Sum	127062667	116177707	113048369	115802749	143075974	140960661	139224360	145472025	171953229	169341074	159078800
F ub	0.862258	0.798692	0.732807	0.672565	0.616485	0.566368	0.419301	0.33396	0.305893	0.284933	0.278968
F naked	0.0298456	0.0462368	0.0320415	0.0366024	0.0314763	0.0297581	0.0366861	0.0386897	0.034202	0.0317462	0.0360528
F peptide	0.107896	0.155071	0.235152	0.290833	0.352039	0.403874	0.544013	0.627351	0.659905	0.68332	0.684979
	Lane 23	Lane 24	Lane 25	Lane 26	Lane 27	Lane 28	Lane 29	Lane 30	Lane 31	Lane 32	Lane 33
	Volume	Volume	Volume	Volume	Volume	Volume	Volume	Volume	Volume	Volume	Volume
	123093689	135133523	110482827	65543350	24189839	96386328	89647290	49236193	37852850	48875836	34611480
	4602332	6502995	5381003	2714758	1566140	5816827	6295424	4369769	4254303	5904990	5111659
	17550079	22118510	30855161	30353042	15282385	47077972	55247294	60965797	66105759	76831858	81875535
Time	0	10	20	30	45	60	120	300	600	1200	1800
Sum	145246100	163755028	146718991	98611150	41038364	149281127	151190008	114571759	108212912	131612684	121598674
F ub	0.847484	0.825218	0.753023	0.664665	0.589445	0.64567	0.592945	0.429741	0.3498	0.371361	0.284637
F naked	0.0316864	0.0397117	0.0366756	0.0275299	0.0381628	0.0389656	0.0416392	0.03814	0.0393142	0.0448664	0.0420371
F peptide	0.12083	0.135071	0.210301	0.307805	0.372393	0.315365	0.365416	0.532119	0.610886	0.583772	0.673326
	Rpt6-EQ Single Turnover
	Lane 1	Lane 2	Lane 3	Lane 4	Lane 5	Lane 6	Lane 7	Lane 8	Lane 9	Lane 10	Lane 11
	Volume	Volume	Volume	Volume	Volume	Volume	Volume	Volume	Volume	Volume	Volume
	151512603	164606940	116543256	148730114	115682284	105625423	71408818	58500472	36729971	30920795	28797046
	6356853	6161895	4343897	5241541	5035459	5356422	4131075	5271762	5384710	4950243	4686697
	23065975	22334186	29615172	39129121	49650154	60711195	78148278	100605424	106345863	115211273	114336072
Time	0	10	20	30	45	60	120	300	600	1200	1800
Sum	180935431	193103021	150502325	193100776	170367897	171693040	153688171	164377658	148460544	151082311	147819815
F ub	0.837385	0.852431	0.774362	0.77022	0.679015	0.615199	0.464634	0.355891	0.247406	0.204662	0.194812
F naked	0.0351333	0.0319099	0.0288627	0.0271441	0.0295564	0.0311977	0.0268796	0.032071	0.0362703	0.0327652	0.0317055
F peptide	0.127482	0.115659	0.196776	0.202636	0.291429	0.353603	0.508486	0.612038	0.716324	0.762573	0.773483
	Volume	Volume	Volume	Volume	Volume	Volume	Volume	Volume	Volume	Volume	Volume
	134945743	185147662	127292528	141998298	113362183	99659049	78973960	59501043	60124047	42542995	33271177
	6067396	6615542	5749056	7218265	5105393	4600603	5681239	5692850	7724841	4981365	4619448
	19570137	22567976	28545377	39441035	45806834	51972715	70745884	87121183	105742983	100666250	101639405
Time	0	10	20	30	45	60	120	300	600	1200	1800
Sum	160583276	214331180	161586961	188657598	164274410	156232367	155401083	152315076	173591871	148190610	139530030
F ub	0.840347	0.863839	0.787765	0.752677	0.690078	0.63789	0.508194	0.390644	0.346353	0.287083	0.238452
F naked	0.0377835	0.030866	0.0355787	0.0382612	0.0310784	0.0294472	0.0365586	0.0373755	0.0445	0.0336146	0.0331072
F peptide	0.121869	0.105295	0.176656	0.209061	0.278843	0.332663	0.455247	0.57198	0.609147	0.679302	0.728441
	Lane 23	Lane 24	Lane 25	Lane 26	Lane 27	Lane 28	Lane 29	Lane 30	Lane 31	Lane 32	Lane 33
	Volume	Volume	Volume	Volume	Volume	Volume	Volume	Volume	Volume	Volume	Volume
	135639536	93467939	80188204	60688492	92689392	75379840	64309859	58488270	55869072	41817216	50928467
	6341218	5445666	5453259	4885667	6377476	4164614	4853027	5490159	6020549	5813907	6678364
	20846304	19034685	21619653	21603274	34700516	39863281	56059356	70758123	91218947	98936984	102737950
Time	0	10	20	30	45	60	120	300	600	1200	1800
Sum	162827058	117948290	107261116	87177433	133767384	119407735	125222242	134736552	153108568	146568107	160344781
F ub	0.833028	0.792448	0.747598	0.696149	0.692915	0.631281	0.513566	0.434094	0.364898	0.285309	0.317618
F naked	0.0389445	0.0461699	0.050841	0.0560428	0.0476759	0.0348773	0.0387553	0.0407474	0.0393221	0.0396669	0.04165
F peptide	0.128027	0.161382	0.201561	0.247808	0.259409	0.333842	0.447679	0.525159	0.59578	0.675024	0.640731
	Wild-type Restart
	Lane 1	Lane 2	Lane 3	Lane 4	Lane 5	Lane 6	Lane 7	Lane 8	Lane 9	Lane 10	Lane 11
	Volume	Volume	Volume	Volume	Volume	Volume	Volume	Volume	Volume	Volume	Volume
	201931491	109021915	122546029	107749515	101284929	99448009	78862780	89029101	41584753	69274678	71423292
	7250396	5754501	7396942	6036419	5874556	6279822	5599630	7669848	5382106	8747863	8481407
	25363828	41401164	49839484	55626768	65679749	77800247	73578689	94260255	57745282	106290421	112298921
Time	-180	0	10	20	30	45	60	120	300	600	1200
Sum	234545715	156177580	179782455	169412702	172839234	183528078	158041099	190959204	104712141	184312962	192203620
F ub	0.860947	0.698064	0.681635	0.636018	0.586007	0.541868	0.499002	0.466221	0.397134	0.375854	0.371602
F naked	0.0309125	0.0368459	0.0411438	0.0356314	0.0339886	0.0342172	0.0354315	0.0401649	0.0513991	0.047462	0.0441272
F peptide	0.10814	0.26509	0.277221	0.328351	0.380005	0.423915	0.465567	0.493615	0.551467	0.576684	0.584271
	Lane 12	Lane 13	Lane 14	Lane 15	Lane 16	Lane 17	Lane 18	Lane 19	Lane 20	Lane 21	Lane 22
	Volume	Volume	Volume	Volume	Volume	Volume	Volume	Volume	Volume	Volume	Volume
	194217122	115404120	126491154	122533671	115355115	80004532	86225804	83645677	74093180	71058635	72439788
	9009406	9030044	6509303	7558408	7421380	4819953	7226106	7357702	7723307	8083511	8326370
	30472194	49439825	47599721	57110081	59409446	57696519	74362987	84654013	88650314	90200653	89711569
Time	-180	0	10	20	30	45	60	120	300	600	1200
Sum	233698722	173873989	180600178	187202160	182185941	142521004	167814897	175657392	170466801	169342799	170477727
F ub	0.831058	0.663723	0.700393	0.654553	0.633172	0.561353	0.513815	0.476186	0.434649	0.419614	0.424922
F naked	0.0385514	0.0519344	0.0360426	0.0403756	0.0407352	0.0338192	0.04306	0.0418867	0.0453068	0.0477346	0.0488414
F peptide	0.130391	0.284343	0.263564	0.305072	0.326092	0.404828	0.443125	0.481927	0.520044	0.532651	0.526236
	Lane 24	Lane 25	Lane 26	Lane 27	Lane 28	Lane 29	Lane 30	Lane 31	Lane 32	Lane 33	Lane 34
	Volume	Volume	Volume	Volume	Volume	Volume	Volume	Volume	Volume	Volume	Volume
	146893963	124005933	87121570	109578915	97622693	109107611	88447794	100935703	95903705	119882108	111233653
	6459016	8738509	9810154	10615675	13017173	9448371	7630666	7172434	8786663	15867139	7389627
	29407117	51450400	49174231	58133241	56505827	61692904	61624281	67578949	80002203	93282048	107137453
Time	-180	0	10	20	30	45	60	120	300	600	1200
Sum	182760096	184194842	146105955	178327831	167145693	180248886	157702741	175687086	184692571	229031295	225760733
F ub	0.803753	0.673232	0.59629	0.61448	0.584057	0.605316	0.560851	0.57452	0.519261	0.523431	0.492706
F naked	0.0353415	0.0474417	0.0671441	0.059529	0.0778792	0.0524185	0.0483864	0.040825	0.0475745	0.0692793	0.0327321
F peptide	0.160906	0.279326	0.336566	0.325991	0.338063	0.342265	0.390762	0.384655	0.433164	0.40729	0.474562
	Rpt6-EQ Restart
	Lane 1	Lane 2	Lane 3	Lane 4	Lane 5	Lane 6	Lane 7	Lane 8	Lane 9	Lane 10	Lane 11
	Volume	Volume	Volume	Volume	Volume	Volume	Volume	Volume	Volume	Volume	Volume
	91424199	66414290	147265088	135392549	135147095	109928800	85491615	98800322	95579451	84229532	86788024
	3305844	3620538	5062936	4062982	5325953	4934978	4899675	7082561	8566007	9042227	10984987
	19816076	23462151	30740463	35796437	45246513	50665039	51438943	77468322	91285711	87761959	100241081
Time	-180	0	10	20	30	45	60	120	300	600	1200
Sum	114546119	93496979	183068487	175251968	185719561	165528817	141830233	183351205	195431169	181033718	198014092
F ub	0.798143	0.710336	0.804426	0.772559	0.727694	0.664107	0.602774	0.538858	0.48907	0.46527	0.438292
F naked	0.0288604	0.0387236	0.027656	0.0231837	0.0286774	0.0298134	0.0345461	0.0386284	0.0438313	0.0499478	0.0554758
F peptide	0.172996	0.25094	0.167918	0.204257	0.243628	0.30608	0.36268	0.422513	0.467099	0.484782	0.506232
	Lane 12	Lane 13	Lane 14	Lane 15	Lane 16	Lane 17	Lane 18	Lane 19	Lane 20	Lane 21	Lane 22
	Volume	Volume	Volume	Volume	Volume	Volume	Volume	Volume	Volume	Volume	Volume
	123254513	119593046	150470362	123323740	121358131	110221259	96281978	88037872	78369271	94478974	95866987
	5914677	6172895	7530013	7407053	9250325	7606308	6698128	7388912	8498351	10149592	12200358
	26718644	33196580	38367165	42245297	56030548	63099603	67625537	81711593	75887656	81084117	83737225
Time	-180	0	10	20	30	45	60	120	300	600	1200
Sum	155887834	158962521	196367540	172976090	186639004	180927170	170605643	177138377	162755278	185712683	191804570
F ub	0.790662	0.752335	0.766269	0.712953	0.650229	0.609202	0.564354	0.497001	0.481516	0.508737	0.499816
F naked	0.0379419	0.0388324	0.0383465	0.0428213	0.0495627	0.0420407	0.0392609	0.0417127	0.0522155	0.0546521	0.0636083
F peptide	0.171397	0.208833	0.195384	0.244226	0.300208	0.348757	0.396385	0.461287	0.466268	0.436611	0.436576
	Lane 23	Lane 24	Lane 25	Lane 26	Lane 27	Lane 28	Lane 29	Lane 30	Lane 31	Lane 32	Lane 33
	Volume	Volume	Volume	Volume	Volume	Volume	Volume	Volume	Volume	Volume	Volume
	103068506	120366719	121215966	119577584	105411144	99933102	89208364	86178612	74809556	75249613	72181146
	6254495	6737349	5861760	5798971	4886609	4853578	5394987	6130877	5766743	7313859	8145019
	25061669	31604536	30781854	31828679	32974244	44788860	50529145	63110213	69017673	70467481	71560256
Time	-180	0	10	20	30	45	60	120	300	600	1200
Sum	134384670	158708604	157859580	157205234	143271997	149575540	145132496	155419702	149593972	153030953	151886421
F ub	0.766966	0.758413	0.767872	0.760646	0.735741	0.668111	0.614668	0.55449	0.500084	0.491728	0.475231
F naked	0.0465417	0.0424511	0.0371327	0.0368879	0.0341072	0.032449	0.0371728	0.0394472	0.0385493	0.0477933	0.0536257
F peptide	0.186492	0.199136	0.194995	0.202466	0.230151	0.29944	0.348159	0.406063	0.461367	0.460479	0.471143

## Sheet: Calculated and Averages
Single Turnover Ub															KEY
Time	F ub WT ST 1	F ub WT ST 2	F ub WT ST 3	Time	WT ST Ub Avg	sd	Time	F ub VTENKIF ST 1	F ub VTENKIF ST 2	F ub VTENKIF ST 3	Time	VTENKIF Ub ST Avg	sd		Term	Meaning
0	0.799917	0.775806	0.783723	0	0.786482	0.0122898	0	0.811118	0.819187	0.882614	0	0.83764	0.0391573		WT	Wild-type
10	0.831514	0.850751	0.841805	10	0.841357	0.00962625	30	0.772077	0.827748	0.90162	30	0.833815	0.0649844		VTENKIF	Rpn5-VTENKIF
20	0.703411	0.731453	0.71586	20	0.716908	0.0140503	60	0.778033	0.799267	0.851118	60	0.809473	0.0375961		EQ6	Rpt6-EQ
30	0.632539	0.663742	0.631092	30	0.642458	0.0184473	120	0.727699	0.748276	0.767096	120	0.74769	0.0197051		ST	Single Turnover
45	0.530314	0.579049	0.560342	45	0.556568	0.024586	180	0.686639	0.695298	0.694172	180	0.692036	0.00470791		Naked	Deubiquitinated
60	0.475034	0.523262	0.516631	60	0.504976	0.0261418	300	0.611979	0.601691	0.566395	300	0.593355	0.023908		sd	Standard Deviation
120	0.355267	0.397662	0.398987	120	0.383972	0.0248681	420	0.538757	0.540547	0.492813	420	0.524039	0.0270575		F	Fraction
300	0.341457	0.332522	0.328722	300	0.334234	0.00653799	600	0.484379	0.474852	0.395617	600	0.451616	0.04873		Avg	Average
600	0.305208	0.296346	0.330905	600	0.31082	0.0179502	900	0.416368	0.412179	0.317372	900	0.381973	0.0559855		Ub or Ub(n) or Ubn	Substrate + n Ubiquitin
1200	0.32149	0.379247	0.345494	1200	0.348743	0.0290155	1200	0.376432	0.374231	0.255293	1200	0.335319	0.0693132		Time	in seconds
1800	0.306022	0.347285	0.302498	1800	0.318601	0.0249027	1800	0.328987	0.322844	0.198898	1800	0.283576	0.0733977
Single Turnover Naked
Time	F nake WT ST 1	F nake WT ST 2	F nake WT ST 3	Time	WT ST naked Avg	sd	Time	F naked VTENKIF ST 1	F naked VTENKIF ST 2	F naked VTENKIF ST 3	Time	VTENKIF naked avg	sd
0	0.0426964	0.0446581	0.0564355	0	0.04793	0.00743099	0	0.0333442	0.0607279	0.0273737	0	0.040482	0.0177859
10	0.0465551	0.0397645	0.0498663	10	0.0453953	0.0051498	30	0.0410587	0.0603261	0.0231906	30	0.0415252	0.0185722
20	0.0533517	0.0434692	0.0471031	20	0.0479747	0.00499857	60	0.0597927	0.0606307	0.0292969	60	0.0499068	0.0178536
30	0.0506258	0.0447317	0.0526994	30	0.0493523	0.00413365	120	0.058259	0.0582083	0.0437741	120	0.0534138	0.00834825
45	0.0332091	0.0387545	0.0402582	45	0.0374073	0.00371264	180	0.0673736	0.0654764	0.0662134	180	0.0663545	0.000956436
60	0.0504152	0.0423047	0.0357036	60	0.0428078	0.00736866	300	0.0822191	0.0789654	0.0817452	300	0.0809766	0.00175776
120	0.0466026	0.0437596	0.0442808	120	0.044881	0.00151359	420	0.0902681	0.0976636	0.0897553	420	0.0925623	0.00442528
300	0.0486594	0.0545807	0.0374543	300	0.0468982	0.00869799	600	0.123442	0.12066	0.120636	600	0.121579	0.00161276
600	0.0503305	0.0569669	0.0382311	600	0.0485095	0.00949972	900	0.147107	0.13752	0.152511	900	0.145713	0.00759219
1200	0.0589665	0.0442136	0.0458742	1200	0.0496848	0.00808097	1200	0.15652	0.151314	0.165655	1200	0.15783	0.00725954
1800	0.054044	0.0533573	0.0422008	1800	0.0498674	0.0066483	1800	0.157433	0.14516	0.168008	1800	0.156867	0.0114344
Single Turnover Peptide
Time	F peptide WT ST 1	F peptide WT ST 2	F peptide WT ST 3	Time	WT ST peptide Avg	sd	Time	F peptide VTENKIF ST 1	F peptide VTENKIF ST 2	F peptide VTENKIF ST 3	Time	VTENKIF peptide ST avg	sd
0	0.157387	0.179536	0.159841	0	0.165588	0.0121414	0	0.155538	0.120085	0.0900124	0	0.121878	0.0327996
10	0.121931	0.109485	0.108328	10	0.113248	0.00754184	30	0.186864	0.111926	0.075189	30	0.12466	0.0569161
20	0.243238	0.225078	0.237036	20	0.235117	0.00923063	60	0.162174	0.140102	0.119585	60	0.14062	0.0212993
30	0.316835	0.291526	0.316209	30	0.30819	0.014435	120	0.214042	0.193516	0.18913	120	0.198896	0.0132991
45	0.436477	0.382196	0.3994	45	0.406024	0.0277402	180	0.245987	0.239226	0.239615	180	0.241609	0.00379652
60	0.474551	0.434433	0.447665	60	0.452216	0.0204427	300	0.305802	0.319343	0.35186	300	0.325669	0.0236714
120	0.59813	0.558578	0.556733	120	0.571147	0.0233865	420	0.370975	0.36179	0.417432	420	0.383399	0.0298293
300	0.609883	0.612897	0.633824	300	0.618868	0.0130393	600	0.392179	0.404488	0.483747	600	0.426804	0.0496959
600	0.644462	0.646688	0.630864	600	0.640671	0.00856594	900	0.436525	0.450301	0.530117	900	0.472314	0.0505303
1200	0.619544	0.576539	0.608632	1200	0.601572	0.0223547	1200	0.467048	0.474455	0.579052	1200	0.506852	0.0626371
1800	0.639934	0.599358	0.655301	1800	0.631531	0.0289026	1800	0.513581	0.531996	0.633094	1800	0.559557	0.0643471
Single Turnover 1-Peptide
Time	F peptide WT ST 1	F peptide WT ST 2	F peptide WT ST 3	Time			Time	F peptide VTENKIF ST 1	F peptide VTENKIF ST 2	F peptide VTENKIF ST 3	Time	VTENKIF 1-peptide ST avg	sd
0	0.842613	0.820464	0.840159	0			0	0.844462	0.879915	0.909988	0	0.878122	0.0327996
10	0.878069	0.890515	0.891672	10			30	0.813136	0.888074	0.924811	30	0.87534	0.0569161
20	0.756762	0.774922	0.762964	20			60	0.837826	0.859898	0.880415	60	0.85938	0.0212993
30	0.683165	0.708474	0.683791	30			120	0.785958	0.806484	0.81087	120	0.801104	0.0132991
45	0.563523	0.617804	0.6006	45			180	0.754013	0.760774	0.760385	180	0.758391	0.00379652
60	0.525449	0.565567	0.552335	60			300	0.694198	0.680657	0.64814	300	0.674331	0.0236714
120	0.40187	0.441422	0.443267	120			420	0.629025	0.63821	0.582568	420	0.616601	0.0298293
300	0.390117	0.387103	0.366176	300			600	0.607821	0.595512	0.516253	600	0.573196	0.0496959
600	0.355538	0.353312	0.369136	600			900	0.563475	0.549699	0.469883	900	0.527686	0.0505303
1200	0.380456	0.423461	0.391368	1200			1200	0.532952	0.525545	0.420948	1200	0.493148	0.0626371
1800	0.360066	0.400642	0.344699	1800			1800	0.486419	0.468004	0.366906	1800	0.440443	0.0643471
Restart Ub
Time	WT restart F ub 1	VTENKIF restart F ub 3	WT restart F ub 3	WT F ub restart 3	VTENKIF F ub restart 2	VTENKIF F ub restart 3		Time	WT Ub Restart Avg	VTENKIF Ub Restart Avg	WT sd	VTENKIF sd
-180	0.842149	0.870621	0.803361	0.81239	0.811145	0.84867		-180	0.8193	0.843479	0.0202961	0.0300755
0	0.750847	0.840267	0.728916	0.718994	0.793219	0.764123		0	0.732919	0.799203	0.0162993	0.0384228
10	0.71427	0.834801	0.6917	0.701497	0.801628	0.805453		10	0.702489	0.813961	0.011318	0.0181491
20	0.667144	0.820405	0.648386	0.636658	0.811891	0.780727		20	0.650729	0.804341	0.0153779	0.0208885
30	0.580007	0.804196	0.578482	0.578867	0.795272	0.743979		30	0.579119	0.781149	0.000793281	0.0324976
45	0.500297	0.777389	0.518114	0.515611	0.766434	0.758009		45	0.511341	0.767278	0.00964555	0.00971732
60	0.444093	0.757583	0.475184	0.47478	0.737843	0.733986		60	0.464686	0.743137	0.017835	0.0126582
120	0.364026	0.700138	0.388045	0.4089	0.694252	0.689698		120	0.386991	0.694696	0.0224553	0.00523452
300	0.297947	0.677014	0.327556	0.374352	0.664227	0.657033		300	0.333285	0.666091	0.0385236	0.0101202
600	0.273177	0.667046	0.309361	0.310995	0.634178	0.6386		600	0.297844	0.646608	0.0213779	0.0178374
1200	0.267181	0.637609	0.301144	0.40032	0.609674	0.608789		1200	0.322882	0.618691	0.0691798	0.0163896
Restart Naked
Time	WT restart F naked 1	VTENKIF restart F naked 3	WT restart F naked 3	WT F naked restart 3	VTENKIF F naked restart 2	VTENKIF F naked restart 3		Time	WT naked Restart Avg	VTENKIF naked Restart Avg	WT sd	VTENKIF sd
-180	0.0315698	0.0307657	0.0401709	0.0384335	0.0463024	0.0468479		-180	0.0367247	0.0413054	0.00454804	0.00913164
0	0.0345376	0.0337463	0.0398619	0.030782	0.0414918	0.0645605		0	0.0350605	0.0465996	0.0045625	0.0160295
10	0.0383482	0.0315343	0.0404464	0.0348188	0.0459406	0.0513411		10	0.0378711	0.0429387	0.00284394	0.0102389
20	0.0252347	0.0332035	0.0300674	0.039777	0.0352386	0.051793		20	0.031693	0.0400784	0.00740622	0.0101961
30	0.0315495	0.0316536	0.0357056	0.036318	0.0401768	0.0430115		30	0.0345243	0.0382806	0.00259444	0.00591161
45	0.0374579	0.0349259	0.0461428	0.0329923	0.0354026	0.0468028		45	0.0388644	0.0390438	0.00668712	0.00672374
60	0.040126	0.0369052	0.0387163	0.0391886	0.0432545	0.0565866		60	0.0393436	0.0455821	0.000717519	0.0100451
120	0.0390049	0.0384223	0.0380539	0.0316609	0.0508273	0.0597492		120	0.0362399	0.0496662	0.00399396	0.0107107
300	0.0442428	0.0482884	0.0378808	0.0374631	0.0666205	0.0654588		300	0.0398622	0.0601226	0.00379943	0.0102651
600	0.0466195	0.0544205	0.0391397	0.0322661	0.0656055	0.0709217		600	0.0393418	0.0636493	0.0071788	0.00842274
1200	0.0465369	0.0580134	0.0412321	0.0420916	0.0614935	0.0947442		1200	0.0432869	0.071417	0.00284722	0.0202767
Restart Peptide
Time	WT restart F peptide 1	WT F peptide restart 3	WT restart F peptide 3	VTENKIF F peptide restart 2	VTENKIF F peptide restart 3	VTENKIF restart F peptide 3		Time	WT peptide Restart Avg	VTENKIF peptide Restart Avg	WT sd	VTENKIF sd
-180	0.126281	0.149177	0.156468	0.142552	0.104482	0.0986136		-180	0.143975	0.115216	0.0157511	0.023855
0	0.214615	0.250224	0.231222	0.165289	0.171316	0.125987		0	0.23202	0.154198	0.0178176	0.0246161
10	0.247381	0.263685	0.267854	0.152431	0.143206	0.133665		10	0.25964	0.143101	0.0108189	0.00938349
20	0.307621	0.323565	0.321546	0.15287	0.16748	0.146391		20	0.317577	0.15558	0.00868162	0.0108021
30	0.388443	0.384815	0.385813	0.164551	0.213009	0.164151		30	0.386357	0.180571	0.00187433	0.0280935
45	0.462245	0.451397	0.435743	0.198163	0.195188	0.187685		45	0.449795	0.193679	0.0133234	0.00539959
60	0.515781	0.486031	0.4861	0.218903	0.209428	0.205512		60	0.495971	0.211281	0.0171563	0.00688499
120	0.596969	0.559439	0.573901	0.254921	0.250553	0.261439		120	0.57677	0.255638	0.0189284	0.00547835
300	0.65781	0.588185	0.634563	0.269152	0.277508	0.274697		300	0.626853	0.273786	0.0354475	0.00425182
600	0.680203	0.656739	0.6515	0.300216	0.290478	0.278533		600	0.662814	0.289743	0.0152858	0.0108603
1200	0.686282	0.557589	0.657624	0.328832	0.296466	0.304377		1200	0.633832	0.309892	0.067565	0.0168729
Restart 1-peptide
Time	F peptide WT restart 1	F peptide WT restart 1	F peptide WT restart 3	F peptide VTENKIF restart 2	F peptide VTENKIF restart 3	F peptide VTENKIF restart 3
-180	0.873719	0.850823	0.843532	0.857448	0.895518	0.901386
0	0.785385	0.749776	0.768778	0.834711	0.828684	0.874013
10	0.752619	0.736315	0.732146	0.847569	0.856794	0.866335
20	0.692379	0.676435	0.678454	0.84713	0.83252	0.853609
30	0.611557	0.615185	0.614187	0.835449	0.786991	0.835849
45	0.537755	0.548603	0.564257	0.801837	0.804812	0.812315
60	0.484219	0.513969	0.5139	0.781097	0.790572	0.794488
120	0.403031	0.440561	0.426099	0.745079	0.749447	0.738561
300	0.34219	0.411815	0.365437	0.730848	0.722492	0.725303
600	0.319797	0.343261	0.3485	0.699784	0.709522	0.721467
1200	0.313718	0.442411	0.342376	0.671168	0.703534	0.695623
WT ST #2	F peptide
Time	Trial 1	Trial 2	Trial 3	Average	SD
0	0.0956297	0.107896	0.12083	0.108119	0.0126016
10	0.113017	0.155071	0.135071	0.134386	0.0210353
20	0.235964	0.235152	0.210301	0.227139	0.0145876
30	0.299391	0.290833	0.307805	0.299343	0.00848627
45	0.36539	0.352039	0.372393	0.363274	0.0103406
60	0.438952	0.403874	0.315365	0.386064	0.0636898
120	0.525104	0.544013	0.365416	0.478178	0.0981109
300	0.585985	0.627351	0.532119	0.581818	0.0477523
600	0.662726	0.659905	0.610886	0.644506	0.0291495
1200	0.698674	0.68332	0.583772	0.655256	0.0623805
1800	0.696591	0.684979	0.673326	0.684965	0.0116328
WT ST Ub(n) #2	F Ubn
Time	Trial 1	Trial 2	Trial 3	Average	SD
0	0.875773	0.862258	0.847484	0.861838	0.0141496
10	0.860135	0.798692	0.825218	0.828015	0.0308169
20	0.731037	0.732807	0.753023	0.738956	0.0122149
30	0.671053	0.672565	0.664665	0.669428	0.00419336
45	0.606487	0.616485	0.589445	0.604139	0.0136723
60	0.530059	0.566368	0.64567	0.580699	0.0591228
120	0.43782	0.419301	0.592945	0.483355	0.095358
300	0.371135	0.33396	0.429741	0.378279	0.0482886
600	0.297888	0.305893	0.3498	0.31786	0.0279486
1200	0.266189	0.284933	0.371361	0.307495	0.0560985
1800	0.264031	0.278968	0.284637	0.275879	0.0106448
WT ST naked	F naked
Time	Trial 1	Trial 2	Trial 3	Average	SD
0	0.0285968	0.0298456	0.0316864	0.030043	0.00155423
10	0.0268477	0.0462368	0.0397117	0.0375987	0.00986576
20	0.0329989	0.0320415	0.0366756	0.0339053	0.00244641
30	0.0295561	0.0366024	0.0275299	0.0312295	0.00476209
45	0.0281223	0.0314763	0.0381628	0.0325872	0.0051116
60	0.0309889	0.0297581	0.0389656	0.0332375	0.00499869
120	0.0370765	0.0366861	0.0416392	0.0384673	0.00275386
300	0.0428801	0.0386897	0.03814	0.0399033	0.00259265
600	0.0393866	0.034202	0.0393142	0.0376343	0.00297264
1200	0.0351366	0.0317462	0.0448664	0.0372497	0.00681059
1800	0.0393776	0.0360528	0.0420371	0.0391559	0.00299832
EQ6 ST peptide	F peptide
Time	Trial 1	Trial 2	Trial 3	Average	SD
0	0.127482	0.121869	0.128027	0.125793	0.0034089
10	0.115659	0.105295	0.161382	0.127445	0.0298431
20	0.196776	0.176656	0.201561	0.191664	0.0132156
30	0.202636	0.209061	0.247808	0.219835	0.0244374
45	0.291429	0.278843	0.259409	0.276561	0.0161314
60	0.353603	0.332663	0.333842	0.340036	0.0117643
120	0.508486	0.455247	0.447679	0.470471	0.033139
300	0.612038	0.57198	0.525159	0.569726	0.0434835
600	0.716324	0.609147	0.59578	0.640417	0.0660765
1200	0.762573	0.679302	0.675024	0.705633	0.0493577
1800	0.773483	0.728441	0.640731	0.714218	0.0675088
EQ6 ST Ubn	F Ubn
Time	Trial 1	Trial 2	Trial 3	Average	SD
0	0.837385	0.840347	0.833028	0.83692	0.00368166
10	0.852431	0.863839	0.792448	0.836239	0.0383507
20	0.774362	0.787765	0.747598	0.769908	0.0204504
30	0.77022	0.752677	0.696149	0.739682	0.0387077
45	0.679015	0.690078	0.692915	0.687336	0.00734466
60	0.615199	0.63789	0.631281	0.628123	0.0116703
120	0.464634	0.508194	0.513566	0.495465	0.0268347
300	0.355891	0.390644	0.434094	0.393543	0.0391819
600	0.247406	0.346353	0.364898	0.319552	0.0631652
1200	0.204662	0.287083	0.285309	0.259018	0.0470821
1800	0.194812	0.238452	0.317618	0.250294	0.0622539
EQ6 ST Naked	F naked
Time	Trial 1	Trial 2	Trial 3	Average	SD
0	0.0351333	0.0377835	0.0389445	0.0372871	0.0019535
10	0.0319099	0.030866	0.0461699	0.0363153	0.00855034
20	0.0288627	0.0355787	0.050841	0.0384274	0.0112627
30	0.0271441	0.0382612	0.0560428	0.0404827	0.0145769
45	0.0295564	0.0310784	0.0476759	0.0361036	0.0100508
60	0.0311977	0.0294472	0.0348773	0.0318407	0.00277156
120	0.0268796	0.0365586	0.0387553	0.0340645	0.0063185
300	0.032071	0.0373755	0.0407474	0.0367313	0.00437389
600	0.0362703	0.0445	0.0393221	0.0400308	0.00416038
1200	0.0327652	0.0336146	0.0396669	0.0353489	0.00376356
1800	0.0317055	0.0331072	0.04165	0.0354876	0.00538267
WT restart peptide	F peptide
Time	Trial 1	Trial 2	Trial 3	Average	SD
-180	0.10814	0.130391	0.160906	0.133146	0.0264903
0	0.26509	0.284343	0.279326	0.276253	0.00998735
10	0.277221	0.263564	0.336566	0.29245	0.0388104
20	0.328351	0.305072	0.325991	0.319804	0.0128133
30	0.380005	0.326092	0.338063	0.348054	0.0283106
45	0.423915	0.404828	0.342265	0.390336	0.0427104
60	0.465567	0.443125	0.390762	0.433151	0.0383867
120	0.493615	0.481927	0.384655	0.453399	0.0598199
300	0.551467	0.520044	0.433164	0.501559	0.0612795
600	0.576684	0.532651	0.40729	0.505542	0.0878912
1200	0.584271	0.526236	0.474562	0.528356	0.054885
WT restart Ubn	F Ubn
Time	Trial 1	Trial 2	Trial 3	Average	SD
-180	0.860947	0.831058	0.803753	0.831919	0.0286069
0	0.698064	0.663723	0.673232	0.67834	0.0177311
10	0.681635	0.700393	0.59629	0.65944	0.0554873
20	0.636018	0.654553	0.61448	0.635017	0.020055
30	0.586007	0.633172	0.584057	0.601079	0.027811
45	0.541868	0.561353	0.605316	0.569512	0.0325017
60	0.499002	0.513815	0.560851	0.524556	0.0322935
120	0.466221	0.476186	0.57452	0.505642	0.0598574
300	0.397134	0.434649	0.519261	0.450348	0.0625589
600	0.375854	0.419614	0.523431	0.439633	0.0757981
1200	0.371602	0.424922	0.492706	0.429743	0.0606956
WT restart naked	F naked
Time	Trial 1	Trial 2	Trial 3	Average	SD
-180	0.0309125	0.0385514	0.0353415	0.0349351	0.00383561
0	0.0368459	0.0519344	0.0474417	0.0454073	0.00774725
10	0.0411438	0.0360426	0.0671441	0.0481102	0.01668
20	0.0356314	0.0403756	0.059529	0.0451787	0.0126521
30	0.0339886	0.0407352	0.0778792	0.0508677	0.0236347
45	0.0342172	0.0338192	0.0524185	0.0401516	0.0106252
60	0.0354315	0.04306	0.0483864	0.0422926	0.00651146
120	0.0401649	0.0418867	0.040825	0.0409589	0.00086867
300	0.0513991	0.0453068	0.0475745	0.0480935	0.0030791
600	0.047462	0.0477346	0.0692793	0.0548253	0.0125183
1200	0.0441272	0.0488414	0.0327321	0.0419002	0.00828231
EQ6 restart peptide	F peptide
Time	Trial 1	Trial 2	Trial 3	Average	SD
-180	0.172996	0.171397	0.186492	0.176962	0.00829218
0	0.25094	0.208833	0.199136	0.219636	0.0275402
10	0.167918	0.195384	0.194995	0.186099	0.0157467
20	0.204257	0.244226	0.202466	0.216983	0.0236103
30	0.243628	0.300208	0.230151	0.257996	0.0371727
45	0.30608	0.348757	0.29944	0.318092	0.0267632
60	0.36268	0.396385	0.348159	0.369075	0.024741
120	0.422513	0.461287	0.406063	0.429954	0.0283538
300	0.467099	0.466268	0.461367	0.464911	0.00309778
600	0.484782	0.436611	0.460479	0.460624	0.0240862
1200	0.506232	0.436576	0.471143	0.471317	0.0348285
Eq6 restart Ubn	F Ubn
Time	Trial 1	Trial 2	Trial 3	Average	SD
-180	0.798143	0.790662	0.766966	0.785257	0.016276
0	0.710336	0.752335	0.758413	0.740361	0.0261796
10	0.804426	0.766269	0.767872	0.779522	0.0215822
20	0.772559	0.712953	0.760646	0.748719	0.0315425
30	0.727694	0.650229	0.735741	0.704555	0.0472193
45	0.664107	0.609202	0.668111	0.64714	0.032916
60	0.602774	0.564354	0.614668	0.593932	0.0262968
120	0.538858	0.497001	0.55449	0.530116	0.0297249
300	0.48907	0.481516	0.500084	0.490223	0.00933761
600	0.46527	0.508737	0.491728	0.488578	0.0219042
1200	0.438292	0.499816	0.475231	0.471113	0.0309679
EQ6 restart naked	F naked
Time	Trial 1	Trial 2	Trial 3	Average	SD
-180	0.0288604	0.0379419	0.0465417	0.0377813	0.00884177
0	0.0387236	0.0388324	0.0424511	0.0400023	0.00212135
10	0.027656	0.0383465	0.0371327	0.0343784	0.00585336
20	0.0231837	0.0428213	0.0368879	0.0342976	0.0100718
30	0.0286774	0.0495627	0.0341072	0.0374491	0.0108363
45	0.0298134	0.0420407	0.032449	0.0347677	0.00643499
60	0.0345461	0.0392609	0.0371728	0.0369933	0.00236254
120	0.0386284	0.0417127	0.0394472	0.0399294	0.00159767
300	0.0438313	0.0522155	0.0385493	0.0448654	0.00689154
600	0.0499478	0.0546521	0.0477933	0.0507977	0.00350751
1200	0.0554758	0.0636083	0.0536257	0.0575699	0.00531055

## Sheet: Figure 4B
Final Calculated Rates
		k (obs) (per min)	SEM	n
	Wild-type Single Turnover	1.0128	0.1206	6
	Rpn5-VTENKIF Single Turnover	0.1266	0.01198	3
	Rpt6-EQ Single Turnover	0.4542	0.0396	3
	Wild-type Restarted	0.8616	0.1146	6
	Rpn5-VTENKIF Restarted	0.819	0.1092	3
	Rpt6-EQ Restarted	0.9042	0.1788	3
