# Supplementary material for: Specific lid-base contacts in the 26s proteasome control the conformational switching required for substrate degradation
Source: eLife. 2019 Nov 28;8:e49806. doi: 10.7554/eLife.49806 (PMC6910829; doi:10.7554/eLife.49806)
Supplement: Figure 1—figure supplement 1—source data 1. [file elife-49806-fig1-figsupp1-data1.xlsx]

## Sheet: Figure 1A and Supplement 1A & B
Time (s)	Reconstituted Wild-type	Reconstituted Rpn11-AXA	Reconstituted Rpn5-VTENKIF	Reconstituted no lid	Substrate Alone		Ubiquitin Dependent Degradation Data
0	98.5975	92.6414	94.0045	94.8966	93.555		Data Collected	Proteasome	Substrate	Temp	Multiple turnover degradation rate (substrate/enzyme/min)	Standard Deviation	SEM	n
5	90.2489	89.4986	93.0501	94.9281	93.5428		180831	Reconstituted Wild-type	Titin V15P FAM OG	25C	0.171707	0.0104621	0.00604027	3
10	90.0673	89.4953	93.024	94.8637	93.5961		180831	Reconstituted Rpn5-VTENKIF	Titin V15P FAM OG	25C	0.128488	0.028707	0.016574	3
15	90.1802	89.4751	93.0576	95.1327	93.5608
20	90.1388	89.0266	93.0936	95.0897	93.5548		Ubiquitin Independent Degradation Data Data
25	90.2528	89.2406	93.2479	95.1817	93.4427		Proteasome	Average Degradation Rate (sub/enzyme/min)	SEM	n
30	90.328	89.495	93.2337	95.1158	93.5001		Reconstituted Wild-type	0.17026	0.0103383	3
35	90.1767	89.2891	92.9313	94.8313	93.7064		Reconstituted Rpn11-AXA	0.169227	0.0338264	3
40	90.1554	89.5129	93.0596	95.177	93.3343		Reconstituted Rpn5-VTENKIF	0.100785	0.0126092	3
45	89.7987	89.274	93.133	95.26	93.7754		Reconstituted no lid	0.0704132	0.00625103	3
50	90.0721	89.2568	93.2843	94.8866	93.8449		Substrate Alone	0.0252866	0.0117098	3
55	90.0754	89.4748	92.9579	95.2483	93.5727
60	90.1277	89.3536	93.0553	94.9924	93.7411
65	90.0056	89.3067	93.0843	95.2263	93.7184
70	90.3131	89.3322	93.0406	95.2881	93.425
75	90.0421	89.2976	93.0429	95.0309	93.5959
80	90.2333	89.2842	93.0243	94.9079	93.5508
85	90.0399	89.2392	93.1496	94.7622	93.8072
90	90.0288	89.013	93.0729	95.0468	93.8212
95	89.8834	88.9193	92.8977	95.1848	93.5408
100	89.5916	88.8339	92.7021	94.8661	93.3069
105	89.474	88.8787	92.872	94.8541	93.2299
110	89.7297	88.9418	92.9213	95.0867	93.4564
115	89.739	88.7327	92.7292	95.076	93.2991
120	89.974	88.8488	92.8563	94.943	93.5153
125	89.9491	89.0012	92.7129	94.8029	93.476
130	89.8124	88.9203	92.8635	94.944	93.6739
135	89.7358	88.8595	92.7983	94.7795	93.4329
140	89.4972	88.9303	92.7552	94.678	93.2345
145	89.3164	88.7372	92.8222	94.7643	93.1827
150	89.4276	88.8526	92.6369	94.8709	93.3446
155	89.3744	88.6334	92.5964	94.6205	93.3269
160	89.771	88.9462	92.6855	94.4512	93.539
165	89.5094	88.5864	92.6089	94.7577	93.543
170	89.3988	88.6143	92.6743	95.1128	93.5468
175	89.3511	88.8533	92.5759	94.7575	93.3915
180	89.6414	88.6233	92.6046	94.9351	93.628
185	89.6184	88.7733	92.7928	94.9152	93.4211
190	89.2284	88.4864	92.5411	94.4667	93.2246
195	89.2801	88.5379	92.4832	94.6651	93.545
200	89.1907	88.612	92.4309	94.9945	93.6961
205	89.4386	88.7329	92.765	94.8573	93.4875
210	89.3486	88.6804	92.5796	94.6191	93.554
215	89.1404	88.554	92.6225	94.8286	93.3935
220	89.6462	88.7677	92.5904	94.4857	93.6171
225	89.3837	88.5612	92.8059	94.5224	93.3797
230	89.4252	88.5029	92.6604	94.8203	93.1916
235	88.9955	88.1849	92.666	94.8199	93.3798
240	89.0302	88.3343	92.6624	95.154	93.7928
245	88.9367	88.3723	92.6594	94.856	93.5702
250	89.0913	88.2655	92.4699	94.9169	93.5934
255	88.9464	88.2133	92.5848	94.7899	93.5349
260	88.9425	88.4413	92.5662	94.789	93.4661
265	88.9744	88.0145	92.3868	94.5374	93.3876
270	89.0473	88.4944	92.1764	94.7805	93.4741
275	88.7972	88.2588	92.4302	94.6584	93.1978
280	88.9749	88.1448	92.4716	94.5839	93.2355
285	89.0358	88.0079	92.5632	94.6566	93.2369
290	89.0815	88.3143	92.5783	94.7842	93.2809
295	88.8789	88.2705	92.3978	94.6246	93.368
300	88.6373	88.2045	92.2307	94.5572	93.262
305	88.5374	88.0104	92.3176	94.467	93.3877
310	88.9939	88.0962	92.5856	94.587	93.2798
315	88.7518	88.0799	92.4284	94.6375	93.4093
320	88.4806	87.9517	92.2813	94.556	93.3895
325	88.6731	88.0855	92.5269	94.5729	93.3109
330	88.6925	87.6874	92.3821	94.2926	93.278
335	88.4928	87.8783	92.382	94.8498	93.4602
340	88.3936	87.9874	92.3068	94.8371	93.6349
345	88.7176	88.0186	92.2816	94.4572	93.1326
350	88.4626	87.8958	92.2108	94.7431	93.3188
355	88.5641	87.828	92.1257	94.1875	93.4738
360	88.2913	87.7029	92.0198	94.3958	93.3012
365	88.6166	87.9383	92.2699	94.5849	93.3916
370	88.418	87.6667	92.0466	94.4076	93.2523
375	88.6837	87.7351	92.3023	94.4579	92.9977
380	88.3781	87.4816	92.1151	94.4269	93.3542
385	88.486	87.9462	92.3057	94.6393	93.3819
390	88.0715	87.3713	91.8771	94.4765	93.3127
395	88.3478	87.3261	92.2535	94.2982	92.9205
400	88.4401	87.511	91.8165	94.4828	93.1718
405	88.3234	87.6916	92.2156	94.492	93.6443
410	88.279	87.5997	92.1705	94.2896	93.1619
415	88.1878	87.4664	91.859	94.4098	93.1008
420	88.0399	87.428	92.0922	94.2475	93.0968
425	88.2454	87.5109	91.9902	94.4462	93.0441
430	88.2866	87.6345	92.0425	94.3939	93.3583
435	88.2533	87.4519	92.0066	94.5771	93.327
440	88.349	87.572	91.8362	94.6125	93.262
445	88.4919	87.2843	91.9237	94.3514	93.1963
450	88.2109	87.7712	92.1123	94.5656	93.2683
455	88.0619	87.538	92.0869	94.6777	93.2853
460	88.0989	87.57	92.091	94.6272	93.325
465	87.7818	87.3726	91.8404	94.478	93.012
470	88.0177	87.4231	92.0258	94.3101	93.3307
475	88.1155	87.4468	91.9813	94.5057	93.1876
480	88.0777	87.5071	91.8512	94.5708	93.2329
485	88.0072	87.5021	92.0129	94.2057	93.1948
490	87.949	87.3116	91.8962	94.3267	93.2599
495	88.208	87.2537	91.9661	94.484	93.3171
500	87.882	87.2703	91.7202	94.1748	93.2309
505	87.9712	87.2369	91.6684	94.3817	92.8863
510	87.6566	87.2647	91.7894	94.5724	93.4798
515	87.6574	87.1826	91.8726	94.3689	93.0369
520	87.8096	87.1472	91.8583	94.2082	93.2153
525	87.8069	87.2194	91.4737	94.2276	93.1366
530	87.7169	86.978	92.047	94.1843	93.4406
535	87.4743	86.8328	91.4614	94.1394	93.0303
540	87.573	86.8425	91.7705	94.0273	92.8473
545	87.8358	87.0979	91.5515	93.9382	93.1326
550	87.9456	86.8723	91.4234	94.2665	93.002
555	87.357	86.8803	91.5612	94.0305	92.772
560	87.1973	87.0429	91.2511	94.1237	92.864
565	87.55	86.6808	91.4355	94.0417	92.9355
570	87.6319	86.5613	91.4976	94.1515	93.0982
575	87.3619	86.7688	91.5877	94.0791	92.776
580	87.5911	86.7954	91.5782	94.2244	92.9141
585	87.5268	86.8188	91.5289	93.9166	93.0159
590	87.5914	86.9074	91.5232	94.0375	93.1474
595	87.4273	86.857	91.4958	94.0402	93.0082
600	87.5262	86.7981	91.4924	94.0791	93.0617
605	87.3535	86.8247	91.6589	94.0069	92.7619
610	87.4902	86.7516	91.4596	94.0166	93.1167
615	87.4588	86.9085	91.5629	94.2943	93.1757
620	87.516	86.7886	91.6963	94.1499	92.9365
625	87.5674	86.4817	91.6265	93.845	93.2956
630	87.3396	86.6532	91.4182	94.0032	92.7585
635	87.355	86.5452	91.2884	94.2341	92.9181
640	86.9733	86.328	91.3907	93.8528	92.815
645	87.3033	86.6225	91.4889	94.1129	92.9595
650	87.1714	86.4317	91.4995	93.9679	93.1743
655	87.0069	86.7083	91.282	94.1196	93.1839
660	87.4837	86.3373	91.4647	94.2643	93.1088
665	87.3033	86.5867	91.6829	94.0841	93.027
670	87.2972	86.5618	91.52	94.2349	93.1134
675	87.1736	86.4513	91.7591	94.148	93.1792
680	87.3459	86.3391	91.4545	94.0842	92.9829
685	87.363	86.2435	91.4701	94.3054	93.0199
690	86.9512	86.6429	91.1292	93.9113	93.1451
695	87.1933	86.4561	91.2175	94.2485	93.0585
700	86.7534	86.2628	91.2055	94.0096	93.2371
705	87.1278	86.3476	91.1679	93.7908	93.1891
710	87.048	86.4145	91.1299	94.1686	92.7362
715	86.9835	86.5128	91.7392	94.073	92.959
720	87.0362	86.4484	90.9072	93.9781	92.7881
725	86.8827	86.1809	91.432	94.0508	93.2079
730	87.0323	86.401	91.401	94.0625	93.2586
735	87.117	86.2543	91.3838	93.9806	93.2335
740	87.1925	86.5343	91.1424	94.0881	92.9066
745	86.8433	86.0568	91.16	93.999	93.2507
750	87.2357	86.347	91.167	94.0493	93.1548
755	87.1313	86.3192	91.3544	94.0005	93.0713
760	86.9116	86.2738	90.9722	93.9228	92.8769
765	86.8948	86.1141	91.0982	93.9184	93.1829
770	87.0198	86.1767	91.2097	93.9021	93.1514
775	87.1016	86.2478	91.2651	93.9085	92.903
780	86.9326	85.959	91.0021	93.9299	93.1389
785	86.959	86.1875	91.3444	94.178	92.951
790	86.6996	86.2589	91.267	93.8386	93
795	86.821	86.0403	91.0587	93.9918	92.8823
800	86.999	86.097	91.5056	93.9802	93.1336
805	87.0073	86.1141	91.2431	94.0824	92.971
810	86.6246	86.0988	91.0964	93.8742	92.8499
815	87.0121	85.9873	91.3143	94.1668	93.2081
820	87.1375	86.0203	91.1147	93.9359	93.0764
825	86.7337	85.8422	91.1537	94.1024	93.0641
830	86.6988	85.9288	91.1713	93.9306	93.1601
835	86.8145	85.8639	90.9112	93.9016	93.1596
840	86.5384	85.7933	91.0424	93.8407	92.911
845	86.8039	86.0038	91.1602	94.1968	93.2392
850	86.642	85.8491	91.0797	93.8357	92.9962
855	86.7037	85.9005	91.1618	94.1346	93.4367
860	86.4345	85.7371	91.2788	93.8819	93.1131
865	86.8827	86.0029	91.3079	93.9294	93.1525
870	86.5544	85.6846	91.1002	94.0833	92.9214
875	86.6017	85.6626	91.3272	94.2136	93.1627
880	86.395	85.7876	90.9943	94.0059	93.1435
885	86.4867	85.8951	91.1568	94.0614	93.0843
890	86.8742	85.729	91.1537	93.9679	93.1995
895	86.7102	85.7544	91.1431	94.0273	93.2175
900	86.5487	85.7947	91.3752	94.0873	93.2645
905	86.7043	85.859	91.3994	93.8199	93.317
910	86.4973	85.9248	91.1844	94.0288	93.2434
915	86.596	85.726	91.0698	94.008	93.0298
920	86.2341	85.5855	90.9726	93.6643	93.2548
925	86.3243	85.7269	91.0073	93.8093	93.1177
930	86.3201	85.5814	91.0587	94.2053	93.2645
935	86.4856	85.5039	91.21	93.8605	93.1307
940	86.381	85.53	90.7844	93.937	92.955
945	86.1734	85.5634	90.7811	93.7713	93.1174
950	86.3596	85.5184	91.1368	93.8294	93.3526
955	86.0692	85.1696	90.7816	94.0628	93.0805
960	86.2804	85.4958	91.1003	93.6717	93.2347
965	86.3345	85.5875	91.2771	94.2141	93.1632
970	86.2402	85.4633	90.8317	94.015	93.1019
975	86.2841	85.3001	90.9453	93.904	93.0015
980	85.9976	85.2125	90.9099	93.7638	93.1718
985	86.0961	85.3977	90.8346	93.8298	92.9799
990	85.8588	85.2963	90.8671	93.8218	93.2171
995	86.2048	85.401	90.714	93.7876	93.0457
1000	86.3253	85.5436	90.8979	93.883	93.0322
1005	86.1085	85.1906	90.6786	93.9451	93.0593
1010	86.1045	85.1413	90.8161	94.0182	93.1421
1015	86.0177	85.1765	91.0834	93.9492	93.0894
1020	85.9546	85.3822	90.7839	93.8516	93.0831
1025	86.0675	85.2351	90.9673	93.5542	92.8531
1030	85.9524	84.9994	90.7235	93.8188	93.0923
1035	85.8118	85.1042	90.7499	94.1272	92.9146
1040	85.9549	85.2224	90.5476	94.0277	93.1941
1045	85.8702	85.3404	90.7751	93.7463	93.1859
1050	86.1259	85.2608	90.8579	94.032	93.4484
1055	85.9403	85.4032	90.9181	93.8115	92.941
1060	85.9859	85.4131	90.6928	93.9366	93.1584
1065	85.8626	85.0283	90.6421	93.7181	92.741
1070	86.0204	85.0827	90.8045	93.7088	93.337
1075	86.0156	85.192	90.8185	94.102	92.9849
1080	85.776	85.2209	90.6137	93.9084	93.1998
1085	85.6771	85.2586	90.7027	93.9152	92.9044
1090	85.9164	85.2015	90.9128	94.1215	92.9421
1095	85.8527	85.0329	90.5964	93.7905	93.1065
1100	85.7221	85.1294	90.8382	93.7388	93.1237
1105	85.9187	85.2789	90.7725	94.007	93.0334
1110	85.8396	84.753	90.6845	93.7766	93.1548
1115	85.8607	84.8562	90.629	93.9856	93.4152
1120	85.5655	85.0581	90.6244	93.924	93.084
1125	85.9296	85.0509	91.0795	94.0402	93.4504
1130	85.8457	85.2949	90.8464	94.0471	93.3604
1135	85.8197	85.2003	90.8662	93.8863	93.1296
1140	86.0363	85.0393	90.9255	94.0315	93.3683
1145	85.8598	85.1621	90.7889	93.8396	93.2761
1150	85.959	85.1442	90.7505	93.9513	93.2761
1155	85.721	84.9437	90.9158	94.0947	93.3194
1160	85.9263	84.9784	90.8821	94.065	93.2571
1165	85.7226	85.0916	90.752	93.9235	93.1694
1170	85.7065	85.2246	90.9451	94.0299	93.2369
1175	85.7106	84.8782	90.6874	94.1093	93.384
1180	85.8311	85.1027	90.7796	94.0853	93.2819
1185	85.5877	85.1094	90.836	93.918	93.3684
1190	85.7061	85.1257	90.4485	94.0043	93.3996
1195	85.4662	84.8508	90.5483	93.7394	93.3877
1200	85.5304	84.8341	90.8035	93.9157	93.0097

## Sheet: Figure 1C
Time (s)	Endogenous Wild-type Trial 1	Endogenous Wild-type Trial 2	Endogenous Wild-type Trial 3	Endogenous Rpn5-VTENKIF Trial 1	Endogenous Rpn5-VTENKIF Trial 2	Endogenous Rpn5-VTENKIF Trial 3	Substrate alone	Chymotrypsin control	Reconstituted Wild-type Trial 1	Reconstituted Wild-type Trial 2	Reconstituted Wild-type Trial 3	Reconstituted Rpn5-VTENKIF Trial 1	Reconstituted Rpn5-VTENKIF Trial 2	Reconstituted Rpn5-VTENKIF Trial 3	Substrate alone	Chymotrypsin control	Polarization (x 10^3)		y = y0 + A1*exp(-(x-x0)/t1) + A2*exp(-(x-x0)/t2)
9	227	247	223	215	208	209	195	-89	216	207	218	205	205	207	197	-86			Fit with first two increasing time points omitted
13	228	247	225	210	208	211	186	-90	220	209	219	204	201	205	196	-87				y0	y0	x0	x0	A1	A1	t1	t1	A2	A2	t2	t2	Statistics	Statistics	s	s
17	224	235	207	206	206	212	187	-86	213	212	209	201	197	192	197	-89				Value	Standard Error	Value	Standard Error	Value	Standard Error	Value	Standard Error	Value	Standard Error	Value	Standard Error	Reduced Chi-Sqr	Adj. R-Square	k fast	k slow	k fast per min	k slow per min
21	205	215	195	211	216	214	181	-95	208	204	199	199	196	198	189	-93			Endogenous Wild-type Trial 1	-69.4069	2.89145	19.9134	4483450	42.4687	692013	275.149	61.9309	237.956	33926600	31.4462	0.83677	10.258	0.99603	31.4462	275.149	1.90802	0.218064
25	177	195	172	203	208	198	182	-88	196	199	189	193	191	189	186	-86			Endogenous Wild-type Trial 2	-59.3469	1.4393	18.1812	--	57.1718	--	197.437	24.7828	237.294	--	30.6902	0.88298	8.52867	0.99685	30.6902	197.437	1.95502	0.303894
29	158	164	147	191	206	199	189	-91	189	184	182	197	190	191	190	-82			Endogenous Wild-type Trial 3	-75.6311	6.44408	19.3992	--	45.012	--	415.784	134.753	233.236	--	31.7695	0.80625	10.493	0.99552	31.7695	415.784	1.8886	0.144306
33	133	144	124	182	197	192	183	-95	174	169	177	194	193	195	190	-91			Endogenous Rpn5-VTENKIF Trial 1	-93.4981	130.718	30.6443	7786790	125.718	872318	1122.23	1729.46	156.402	15322500	79.4824	5.71354	13.1661	0.9957	79.4824	1122.23	0.754884	0.0534651
37	114	125	107	180	190	187	188	-90	162	161	161	193	191	184	192	-89			Endogenous Rpn5-VTENKIF Trial 2	-1211.64	45061.6	122.972	--	63.0486	--	92.1926	7.05393	1229.43	--	18185.6	680417	14.6228	0.9955	92.1926	18185.6	0.650811	0.00329931
41	93	105	87	171	181	184	181	-90	157	153	153	190	185	185	188	-89			Endogenous Rpn5-VTENKIF Trial 3	-63.8429	68.5003	27.1644	12293100	114.331	1833760	766.447	825.658	149.844	22635200	81.3794	7.7474	15.4303	0.99489	81.3794	766.447	0.737287	0.0782833
45	76	87	70	166	168	176	185	-97	145	141	144	192	185	187	197	-90			Reconstituted Wild-type Trial 1	-42.6306	5.69369	11.8138	8457540	221.694	33054800	56.7238	1.19021	63.376	544538	984.33	176.975	9.91999	0.99371	56.7238	984.33	1.05776	0.0609552
49	60	73	53	163	167	162	185	-93	136	138	134	187	192	188	189	-93			Reconstituted Wild-type Trial 2	-28.1267	1.69281	10.8	34455600	213.055	139681000	52.5552	1.27483	61.0258	3917140	536.791	49.5381	9.52754	0.99385	52.5552	536.791	1.14166	0.111775
53	52	63	46	158	157	159	184	-91	127	128	127	186	183	188	186	-91			Reconstituted Wild-type Trial 3	-30.1955	1.41208	17.2944	--	178.667	--	54.7871	1.39713	67.1103	--	491.192	37.9186	8.78124	0.9946	54.7871	491.192	1.09515	0.122152
57	38	56	35	139	151	151	177	-94	122	122	122	180	184	189	195	-91			Reconstituted Rpn5-VTENKIF Trial 1	-11.8458	1.8579	-3.91851	12674700	108.546	11275900	717.276	74562600	108.546	13245300	717.276	74562600	9.97017	0.99589	717.276	717.276	0.0836498	0.0836498
61	25	41	23	143	148	142	183	-94	107	110	114	185	185	187	188	-92			Reconstituted Rpn5-VTENKIF Trial 2	-29.2273	2.02001	-11.7178	56564800	117.507	10244100	732.781	157385000	117.507	15117500	732.781	157385000	10.884	0.99603	732.781	732.781	0.0818799	0.0818799
65	24	34	16	125	141	139	186	-92	107	105	105	186	176	179	190	-91			Reconstituted Rpn5-VTENKIF Trial 3	-49.4172	3.01826	-0.16731	--	127.759	--	837.566	--	127.759	--	837.566	--	14.7179	0.99515	837.566	837.566	0.0716362	0.0716362
69	12	28	13	122	130	131	187	-90	103	104	102	182	183	186	194	-94
73	10	18	5	117	129	132	182	-93	92	90	93	182	183	191	188	-92
77	1	19	-1	111	124	123	185	-96	82	82	87	180	174	183	190	-91
81	-5	13	-5	111	122	119	181	-92	82	81	89	181	176	177	188	-94
85	-6	9	-4	108	115	117	190	-89	67	70	79	181	179	180	185	-93				k fast average per min	k fast standard deviation per min
89	-12	2	-8	96	110	111	189	-89	69	78	77	181	174	186	192	-87			Endogenous Wild-type	1.91721	0.0341529
93	-16	4	-16	99	108	103	189	-92	63	62	74	180	171	179	190	-93			Endogenous Rpn5-VTENKIF	1.09819	0.0420323
97	-19	1	-18	90	108	102	188	-91	66	60	69	180	176	185	192	-89			Reconstituted Wild-type	0.714328	0.0557059
101	-23	-7	-21	83	100	99	183	-93	63	62	58	176	172	179	198	-93			Reconstituted Rpn5-VTENKIF	0.0790553	0.00648581
105	-20	-5	-23	89	92	99	179	-95	59	52	56	176	167	175	193	-94
109	-27	-8	-23	83	92	87	188	-93	53	49	54	177	176	173	187	-93
113	-23	-18	-32	81	91	83	187	-89	48	48	55	170	172	177	180	-87
117	-29	-17	-25	77	86	89	188	-92	50	45	50	172	166	174	193	-86
121	-26	-11	-35	71	84	86	186	-96	46	49	48	165	163	172	188	-88
125	-25	-19	-38	62	77	75	192	-95	41	46	49	164	167	164	190	-95
129	-33	-21	-32	71	69	79	186	-96	40	45	46	167	167	170	194	-88
133	-30	-21	-34	63	73	76	188	-95	42	43	45	171	161	166	192	-96
137	-39	-23	-39	60	65	71	185	-91	32	40	42	168	164	171	185	-90
141	-37	-26	-39	56	66	71	184	-87	35	34	40	173	162	168	195	-88
145	-31	-31	-36	60	73	74	185	-94	33	32	35	162	152	170	188	-88
149	-37	-27	-41	52	60	67	185	-91	31	30	36	160	163	164	184	-91
153	-38	-24	-40	54	59	74	186	-89	32	32	34	163	164	158	195	-91
157	-39	-24	-38	44	56	58	186	-93	27	28	34	166	153	162	195	-88
161	-42	-28	-42	46	55	63	185	-94	30	35	30	160	153	160	193	-94
165	-42	-30	-37	48	54	57	188	-92	27	27	31	162	159	159	185	-94
169	-41	-33	-40	47	51	54	184	-90	26	29	32	159	158	159	193	-92
173	-46	-30	-39	42	49	59	191	-90	29	29	33	159	160	154	188	-90
177	-45	-33	-44	39	47	57	183	-91	23	25	28	160	150	171	191	-90
181	-44	-33	-42	36	45	58	184	-93	23	29	25	159	154	155	198	-95
185	-44	-32	-44	41	47	52	186	-88	22	24	26	160	152	159	189	-92
189	-45	-32	-46	41	41	46	182	-93	18	23	21	150	152	156	179	-92
193	-49	-32	-38	36	46	44	184	-101	21	25	24	149	149	155	187	-89
197	-45	-35	-46	33	41	46	187	-90	20	22	28	149	146	149	185	-90
201	-51	-33	-45	31	37	44	187	-95	22	26	20	152	145	153	185	-93
205	-49	-37	-40	27	36	47	186	-95	22	14	24	154	146	155	189	-95
209	-47	-35	-47	33	38	45	186	-96	22	22	24	149	146	149	186	-94
213	-44	-43	-46	27	35	38	187	-92	17	22	17	145	145	152	193	-90
217	-50	-41	-55	29	41	49	184	-92	15	21	21	152	140	151	188	-94
221	-51	-37	-48	22	31	44	187	-89	12	21	20	148	139	150	186	-93
225	-46	-43	-53	26	36	34	189	-92	15	17	15	145	140	148	189	-93
229	-53	-39	-48	28	32	36	181	-92	9	12	14	148	145	149	183	-88
233	-50	-41	-46	25	32	39	183	-89	13	15	17	145	142	145	196	-93
237	-52	-42	-47	20	26	31	186	-94	10	12	16	143	137	140	188	-92
241	-50	-38	-46	16	34	34	182	-91	16	20	19	141	145	145	185	-94
245	-50	-46	-50	24	24	37	187	-96	11	20	21	144	132	148	184	-91
249	-46	-39	-46	16	26	29	182	-95	11	15	13	138	134	140	193	-88
253	-51	-43	-49	24	27	26	185	-88	5	17	14	135	135	147	190	-85
257	-50	-41	-49	23	25	29	190	-93	15	13	13	139	136	141	193	-97
261	-55	-42	-53	23	24	32	184	-90	11	14	14	139	135	142	189	-91
265	-56	-45	-45	17	23	29	183	-93	10	11	16	140	130	134	189	-91
269	-50	-41	-54	17	25	30	185	-93	11	17	9	134	134	136	191	-93
273	-52	-43	-54	13	20	25	191	-92	11	12	14	135	137	133	190	-91
277	-51	-45	-51	20	24	23	183	-93	2	14	11	132	132	133	191	-86
281	-52	-42	-49	16	15	25	183	-90	7	13	13	139	130	139	184	-92
285	-52	-43	-48	13	22	23	182	-97	10	7	8	135	130	138	184	-94
289	-50	-47	-51	13	25	21	185	-93	7	8	7	134	130	134	185	-91
293	-54	-44	-48	17	7	19	188	-92	10	10	11	127	122	135	189	-85
297	-56	-48	-54	9	14	15	183	-93	7	10	10	131	122	129	200	-88
301	-54	-44	-51	12	17	27	182	-95	5	13	10	134	127	133	190	-87
305	-54	-49	-52	17	13	27	177	-95	11	7	16	134	126	132	194	-95
309	-55	-48	-54	12	14	23	192	-93	7	6	3	130	119	128	186	-90
313	-58	-52	-53	12	15	16	186	-95	1	7	5	127	123	128	190	-91
317	-57	-45	-57	14	15	17	191	-96	0	9	5	128	125	127	191	-90
321	-59	-47	-56	11	16	22	184	-88	3	10	8	123	118	128	190	-94
325	-55	-43	-52	8	13	14	185	-90	2	5	9	132	124	124	193	-89
329	-63	-48	-53	7	9	15	183	-93	3	6	2	126	120	129	188	-87
333	-49	-48	-54	5	12	20	182	-92	2	5	15	119	116	121	184	-90
337	-59	-52	-59	1	12	19	184	-89	0	3	13	125	112	129	190	-87
341	-51	-51	-60	6	5	11	189	-97	1	7	1	131	119	124	180	-96
345	-57	-50	-54	4	9	19	183	-94	5	7	8	125	115	124	185	-93
349	-54	-51	-54	6	2	22	188	-91	2	3	5	120	114	121	188	-89
353	-60	-47	-55	4	3	18	188	-95	0	3	4	122	117	121	184	-92
357	-55	-51	-59	0	7	11	187	-91	-1	7	1	121	114	120	196	-96
361	-58	-48	-62	0	8	13	189	-95	3	-1	7	110	113	121	186	-91
365	-55	-51	-56	3	5	12	184	-94	1	-1	2	113	107	119	192	-90
369	-55	-46	-58	5	3	8	185	-91	2	0	0	121	113	120	186	-95
373	-61	-50	-59	2	9	8	180	-92	0	4	7	108	113	124	192	-87
377	-60	-45	-55	0	0	13	185	-91	1	8	2	119	113	118	186	-88
381	-56	-49	-53	-4	6	3	185	-90	4	4	4	114	109	116	187	-90
385	-59	-51	-56	1	0	5	183	-90	0	0	6	113	104	113	184	-96
389	-58	-52	-54	-8	4	8	181	-97	7	5	1	113	103	116	182	-91
393	-51	-45	-58	-8	4	9	179	-92	1	1	1	113	110	113	192	-92
397	-55	-47	-55	-1	1	8	182	-95	-3	-1	2	112	101	109	190	-88
401	-59	-54	-62	1	2	6	182	-93	2	1	2	118	105	114	189	-89
405	-57	-53	-55	-2	-2	2	181	-93	0	6	5	111	100	114	195	-90
409	-60	-48	-60	-4	0	6	184	-92	2	-2	-4	111	103	107	190	-91
413	-57	-47	-54	-5	6	5	185	-89	0	1	-4	110	102	108	196	-93
417	-59	-54	-61	1	6	2	185	-92	-1	1	0	110	103	108	184	-88
421	-60	-52	-62	-6	-1	4	185	-90	4	-3	-6	107	102	113	189	-92
425	-64	-55	-58	-5	-7	8	184	-98	-1	-3	-3	103	97	107	194	-93
429	-61	-53	-57	-7	2	12	185	-91	3	-3	2	111	98	107	189	-90
433	-54	-52	-61	-6	-8	14	183	-89	-6	-4	0	102	93	108	191	-91
437	-64	-52	-59	-6	-3	2	183	-94	2	-2	-1	107	98	100	188	-86
441	-61	-55	-59	-1	5	4	181	-94	-5	1	1	105	94	99	188	-91
445	-65	-51	-63	-7	-5	0	182	-93	1	-5	-5	104	98	96	181	-91
449	-63	-57	-56	-3	-9	5	184	-92	-4	0	-1	104	97	98	192	-91
453	-62	-49	-57	-11	-3	6	186	-93	3	4	-2	100	92	101	187	-90
457	-58	-55	-63	-5	-6	-1	184	-89	0	-4	-5	106	92	95	189	-93
461	-62	-49	-62	-2	6	1	184	-91	-2	-2	-4	100	93	97	186	-91
465	-65	-52	-61	-8	1	0	186	-89	1	-9	-2	99	86	99	189	-88
469	-57	-53	-61	-11	-5	-3	188	-90	-4	-2	-4	100	88	97	185	-91
473	-59	-53	-61	-8	-2	7	184	-95	2	-3	-2	95	90	89	183	-92
477	-56	-52	-59	-6	-8	5	185	-89	-2	-8	-7	96	89	95	189	-90
481	-62	-52	-62	-15	-8	-3	184	-93	-6	-7	-9	100	89	94	185	-89
485	-63	-57	-62	-10	-4	1	183	-91	-4	-8	-3	97	88	95	190	-90
489	-63	-55	-58	-11	-10	-3	184	-92	-9	-3	-5	92	89	93	184	-87
493	-67	-54	-64	-11	-5	1	187	-87	-8	-6	-3	91	86	92	187	-93
497	-61	-56	-65	-8	-6	-1	183	-96	-9	-8	-7	96	87	89	188	-93
501	-66	-54	-64	-12	-3	-1	185	-94	-6	-3	-8	92	81	92	181	-90
505	-67	-57	-59	-12	-5	-7	181	-92	-4	-8	-2	87	82	90	183	-92
509	-63	-55	-63	-5	-3	-3	184	-92	-9	-6	-7	86	87	94	192	-89
513	-55	-57	-59	-16	-3	-7	184	-97	-8	-4	-10	92	84	89	197	-91
517	-66	-56	-64	-11	-5	-1	186	-92	-4	-4	-5	90	83	88	186	-92
521	-62	-57	-62	-12	-8	2	182	-97	-5	-5	-2	88	88	85	192	-89
525	-63	-59	-59	-14	-6	-5	183	-94	-1	-7	-8	96	84	87	190	-90
529	-69	-57	-67	-15	-9	0	183	-91	-9	-5	-6	93	87	83	182	-95
533	-60	-52	-64	-6	-10	-3	186	-96	-12	-8	-5	89	82	84	185	-92
537	-66	-57	-63	-15	-16	-11	182	-92	-9	-7	-13	88	84	86	180	-93
541	-61	-59	-67	-15	-12	-2	183	-93	-8	-8	-14	90	79	83	188	-91
545	-64	-54	-58	-12	-12	-9	179	-95	-8	-4	-6	92	80	84	187	-92
549	-62	-56	-63	-15	-12	-8	183	-91	-3	-9	-8	87	75	81	188	-93
553	-64	-55	-66	-17	-6	-6	181	-90	-6	-4	-10	82	78	81	190	-90
557	-60	-56	-64	-19	-14	0	182	-94	-7	-5	-8	83	72	78	188	-83
561	-63	-53	-63	-16	-10	-7	186	-93	-1	-9	-10	89	80	80	189	-87
565	-61	-54	-66	-13	-7	-4	181	-94	-13	-8	-3	87	80	75	189	-91
569	-63	-53	-63	-18	-13	-13	184	-93	-8	-8	-10	91	77	72	184	-90
573	-63	-52	-67	-16	-9	-15	187	-90	-10	-7	-9	87	72	71	191	-90
577	-66	-55	-58	-12	-9	-7	183	-93	-3	-12	-6	82	74	74	186	-87
581	-62	-57	-67	-18	-8	-8	181	-89	-7	-5	-9	84	71	73	187	-88
585	-65	-59	-63	-18	-20	-5	183	-95	-4	-5	-7	86	75	75	185	-93
589	-63	-61	-62	-15	-16	-8	186	-94	-5	-8	-10	81	72	72	177	-89
593	-63	-51	-65	-16	-13	-12	180	-94	-8	-6	-12	83	74	80	187	-91
597	-64	-55	-61	-17	-13	-4	177	-94	-8	-8	-9	83	75	76	190	-90
601	-60	-56	-62	-20	-14	-7	186	-90	-13	-7	-9	83	72	73	181	-91
605	-67	-52	-63	-12	-12	-9	184	-95	-5	-10	-6	78	72	70	184	-96
609	-64	-61	-61	-15	-15	-14	184	-94	-7	-9	-12	81	78	71	186	-94
613									-9	-6	-7	86	74	70	184	-96
617									-9	-10	-12	80	68	74	188	-90
621									-7	-7	-9	79	72	63	190	-91
625									-8	-9	-15	81	71	67	188	-93
629									-8	-8	-17	75	71	68	191	-86
633									-6	-9	-14	79	63	69	184	-91
637									-9	-8	-9	77	67	73	180	-88
641									-6	-10	-10	82	71	66	185	-93
645									-13	-7	-11	79	67	64	184	-90
649									-13	-9	-9	77	68	66	186	-95
653									-9	-8	-9	75	63	68	194	-93
657									-10	-9	-16	81	61	69	184	-90
661									-7	-11	-8	77	61	62	186	-93
665									-10	-11	-14	73	59	65	180	-90
669									-15	-4	-14	72	61	61	185	-90
673									-13	-7	-18	75	57	65	189	-94
677									-11	-12	-13	72	63	61	189	-96
681									-11	-9	-10	69	66	62	186	-93
685									-8	-9	-10	74	61	64	191	-91
689									-8	-7	-12	71	61	65	190	-93
693									-11	-3	-15	76	60	63	193	-96
697									-14	-5	-16	70	69	59	181	-90
701									-14	-14	-11	70	64	54	187	-93
705									-14	-13	-15	70	60	64	186	-92
709									-9	-8	-14	66	55	54	188	-96
713									-12	-9	-21	66	54	61	182	-88
717									-9	-12	-10	67	55	62	190	-87
721									-8	-14	-16	68	61	57	186	-89
725									-13	-9	-19	65	54	62	182	-88
729									-8	-12	-19	66	58	56	182	-91
733									-10	-13	-16	67	55	53	185	-90
737									-5	-13	-15	63	55	52	187	-89
741									-8	-15	-16	65	53	55	189	-92
745									-12	-13	-19	65	54	53	187	-91
749									-10	-12	-18	62	55	55	181	-90
753									-13	-11	-13	70	54	56	186	-93
757									-14	-16	-16	62	55	46	186	-90
761									-12	-9	-17	65	54	52	183	-95
765									-16	-11	-11	62	56	57	181	-88
769									-14	-9	-19	61	55	45	178	-91
773									-13	-10	-14	60	55	48	189	-91
777									-13	-14	-18	57	50	51	188	-92
781									-13	-13	-16	59	54	52	178	-90
785									-10	-17	-18	62	52	40	184	-91
789									-11	-13	-18	63	48	51	182	-89
793									-17	-12	-13	58	51	51	184	-92
797									-17	-14	-15	57	50	45	179	-91
801									-17	-17	-15	61	49	45	191	-86
805									-9	-13	-19	58	56	48	188	-93
809									-16	-12	-16	56	54	52	183	-92
813									-17	-9	-15	61	51	44	189	-90
817									-12	-7	-16	61	46	51	183	-94
821									-7	-16	-18	57	48	43	186	-95
825									-13	-18	-13	52	52	37	188	-89
829									-12	-15	-19	57	47	45	184	-97
833									-14	-11	-18	53	49	47	188	-86
837									-16	-18	-18	58	42	41	188	-92
841									-14	-16	-14	60	49	48	186	-91
845									-22	-15	-17	50	43	40	183	-94
849									-21	-16	-19	57	46	42	187	-90
853									-15	-16	-19	57	48	39	176	-91
857									-21	-12	-17	56	43	45	191	-89
861									-19	-16	-20	51	44	42	188	-94
865									-19	-18	-17	60	38	39	194	-90
869									-17	-15	-18	56	39	45	189	-92
873									-16	-18	-14	48	42	40	183	-92
877									-13	-23	-16	49	44	39	184	-92
881									-14	-13	-19	52	37	36	182	-96
885									-15	-20	-13	53	44	34	188	-87
889									-21	-15	-19	50	40	42	184	-95
893									-19	-16	-24	49	37	36	194	-90
897									-17	-14	-13	51	35	38	191	-93
901									-23	-9	-18	48	38	36	186	-87
905									-16	-16	-17	53	44	35	185	-89
909									-14	-16	-18	47	40	35	181	-90
913									-14	-19	-24	41	38	39	181	-90
917									-18	-17	-17	49	33	38	184	-89
921									-14	-14	-16	50	33	37	190	-92
925									-13	-20	-17	48	36	37	184	-92
929									-16	-19	-21	48	34	39	186	-93
933									-16	-19	-20	48	37	35	185	-88
937									-18	-15	-16	48	37	29	189	-97
941									-26	-19	-19	45	33	31	180	-96
945									-15	-18	-16	50	42	33	191	-91
949									-14	-16	-16	48	33	35	193	-91
953									-15	-16	-17	47	38	34	183	-93
957									-22	-15	-19	46	41	32	189	-94
961									-22	-14	-19	41	32	36	182	-95
965									-20	-19	-22	50	33	35	184	-95
969									-17	-16	-19	36	27	32	186	-90
973									-17	-18	-23	43	33	40	185	-92
977									-16	-16	-19	45	31	30	186	-95
981									-19	-16	-21	41	34	29	178	-92
985									-18	-25	-22	40	31	29	185	-94
989									-17	-18	-23	48	32	34	189	-92
993									-18	-20	-15	45	27	30	184	-89
997									-14	-19	-21	42	32	35	191	-92
1001									-22	-14	-23	44	30	31	182	-93
1005									-22	-20	-23	41	34	26	179	-92
1009									-23	-18	-22	45	27	30	189	-92
1013									-18	-23	-20	45	28	25	185	-91
1017									-22	-19	-19	41	26	27	192	-89
1021									-11	-14	-26	41	19	28	191	-98
1025									-24	-24	-25	39	24	24	183	-87
1029									-22	-18	-20	45	28	22	181	-91
1033									-23	-19	-22	37	32	22	187	-94
1037									-21	-17	-21	41	24	25	188	-90
1041									-17	-22	-21	41	30	22	184	-95
1045									-17	-21	-24	35	31	23	183	-94
1049									-22	-16	-24	41	25	26	179	-91
1053									-26	-17	-27	41	24	17	183	-95
1057									-21	-20	-26	41	27	21	186	-93
1061									-18	-25	-23	37	20	19	183	-92
1065									-18	-23	-22	41	28	23	188	-93
1069									-21	-22	-21	38	23	28	181	-97
1073									-28	-19	-25	37	30	24	188	-92
1077									-20	-22	-26	31	25	25	185	-94
1081									-28	-19	-21	32	22	26	186	-91
1085									-18	-26	-17	34	27	25	185	-90
1089									-18	-21	-24	36	25	24	193	-93
1093									-21	-23	-23	38	28	23	187	-89
1097									-22	-20	-25	34	21	21	186	-89
1101									-26	-18	-25	30	22	20	193	-91
1105									-24	-18	-25	34	22	13	184	-91
1109									-20	-18	-20	35	18	22	181	-91
1113									-21	-17	-28	30	23	21	190	-94
1117									-22	-17	-25	27	22	18	192	-99
1121									-24	-21	-18	31	18	18	187	-88
1125									-24	-17	-17	37	22	19	185	-95
1129									-18	-21	-20	26	22	12	184	-90
1133									-21	-22	-24	30	20	18	187	-91
1137									-26	-21	-24	30	20	11	187	-94
1141									-26	-26	-21	35	20	15	186	-94
1145									-22	-20	-23	37	15	14	185	-90
1149									-24	-19	-22	29	19	17	180	-88
1153									-24	-22	-27	33	13	10	179	-89
1157									-25	-16	-26	26	21	18	187	-96
1161									-21	-21	-18	29	18	15	186	-97
1165									-19	-21	-24	33	17	16	183	-93
1169									-21	-25	-23	27	19	13	187	-92
1173									-21	-20	-23	30	15	19	183	-93
1177									-26	-23	-28	34	11	18	194	-93
1181									-24	-25	-22	31	19	13	186	-94
1185									-27	-18	-26	31	9	15	184	-89
1189									-22	-24	-29	26	21	11	190	-91
1193									-21	-25	-23	28	14	20	188	-100
1197									-25	-20	-26	26	9	13	184	-90
1201									-25	-20	-27	26	14	13	184	-92
1205									-23	-21	-22	29	15	12	184	-91
1209									-23	-25	-24	29	12	16	188	-91

## Sheet: Figure 1 Supplement 1C
Collated for Fit
Wild-type without substrate (WT -)				Wildtype with substrate (WT +)					Rpn5-VTENKIF without substrate (VTA -)				Rpn5-VTENKIF with substrate (VTA +)
[Lid] (nM)	WT -	[Lid] (nM)	WT -	[Lid] (nM)	WT +	WT +	[Lid] (nM)	WT +	[Lid] (nM)	VTA -	[Lid] (nM)	VTA -	[Lid] (nM)	VTA +	VTA +	[Lid] (nM)	VTA +
1000	17.8442	0	11.1521	1000	58.631	58.2669	0	11.1521	1000	24.6177	0	11.1521	1000	42.6076	35.6156	0	11.1521
800	ND	100	12.4667	800	66.6427	63.3652	100	55.2698	800	24.3628	100	11.1009	800	ND	42.6076	100	16.771
400	17.0795	200	13.1968	400	62.2727	58.9952	200	63.65	400	20.5391	200	18.8244	400	ND	30.845	200	26.6254
200	16.2055	400	14.2203	200	52.076	54.6252	400	72.3237	200	18.609	400	22.4364	200	37.8735	34.7416	400	39.0053
100	13.11	600	14.1924	100	42.6076	42.6076	600	ND	100	15.1858	600	21.0601	100	30.1531	27.2398	600	35.8824
50	10.9979	750	14.5103	50	27.349	28.3687	750	69.0855	50	10.8522	750	20.8155	50	20.7576	23.5252	750	36.581
20	8.44869	1000	13.8291	20	22.2871	20.5026	1000	71.9674	20	10.3788	1000	21.619	20	21.4859	19.4101	1000	36.9304
10	9.7597	1500	16.2883	10	16.6425	21.2674	1500	72.3656	10	9.57761	1500	19.9073	10	18.5361	22.7605	1500	40.4935
0	9.56855	2000	16.973	0	9.56855	9.56855	2000	74.8318	0	9.56855	2000	24.0992	0	9.56855	9.56855	2000	44.3011

## Sheet: Figure 1 Supplement 1D
Time (s)	2X Rpn5-VTENKIF Trial 1	2X Rpn5-VTENKIF Trial 2	1X Rpn5-VTENKIF Trial 1	1X Rpn5-VTENKIF Trial 2	Anisotropy x10^3
0	0.177225	0.178266	0.178658	0.178329
5	0.177828	0.174595	0.176855	0.177103
10	0.175906	0.171173	0.174318	0.174814
15	0.17412	0.170982	0.176108	0.172885
20	0.173087	0.171565	0.174261	0.17246
25	0.171964	0.170638	0.171088	0.173005
30	0.168809	0.171479	0.169326	0.168356
35	0.16588	0.168271	0.169146	0.168562
40	0.168262	0.168293	0.169456	0.166084
45	0.165137	0.166631	0.167333	0.167164
50	0.163605	0.163412	0.165175	0.166174
55	0.16054	0.162751	0.162839	0.16144
60	0.158022	0.159858	0.162712	0.16259
65	0.157421	0.157195	0.161077	0.16045
70	0.15572	0.155884	0.161051	0.1572
75	0.153406	0.155594	0.156978	0.157175
80	0.151297	0.152263	0.157007	0.154837
85	0.150994	0.150938	0.153985	0.154132
90	0.149167	0.149571	0.151605	0.152477
95	0.146524	0.149103	0.152859	0.149471
100	0.145339	0.147716	0.149652	0.149843
105	0.141905	0.143617	0.150123	0.146104
110	0.1429	0.141934	0.147544	0.145812
115	0.139859	0.140071	0.14646	0.146229
120	0.137891	0.138035	0.144568	0.143585
125	0.136948	0.137725	0.143043	0.141205
130	0.134945	0.134804	0.140074	0.138546
135	0.133755	0.134314	0.14038	0.138932
140	0.13312	0.13192	0.137173	0.137089
145	0.131042	0.131368	0.136032	0.135759
150	0.128423	0.128184	0.134558	0.134975
155	0.127943	0.130486	0.134266	0.133663
160	0.126694	0.128875	0.132531	0.131451
165	0.12412	0.125783	0.129778	0.12964
170	0.123972	0.125636	0.128826	0.126157
175	0.122855	0.123233	0.128586	0.127825
180	0.122334	0.122143	0.12657	0.126148
185	0.119707	0.122017	0.125538	0.124567
190	0.119423	0.11999	0.123879	0.124968
195	0.11868	0.119525	0.121786	0.122504
200	0.116737	0.115637	0.121005	0.12094
205	0.115652	0.119042	0.120173	0.120332
210	0.114687	0.116152	0.119256	0.118696
215	0.112168	0.113094	0.118809	0.119158
220	0.111645	0.111792	0.119513	0.116803
225	0.111204	0.111588	0.116177	0.114019
230	0.109842	0.112789	0.115766	0.114647
235	0.108723	0.109439	0.114947	0.111085
240	0.107077	0.108215	0.114067	0.111172
245	0.106711	0.106989	0.112483	0.111894
250	0.107871	0.105906	0.110553	0.110018
255	0.104027	0.105625	0.110971	0.109221
260	0.101911	0.1038	0.107565	0.107698
265	0.102083	0.103252	0.109174	0.106944
270	0.102119	0.104137	0.10839	0.104738
275	0.102696	0.100814	0.106822	0.105404
280	0.100954	0.0998143	0.105232	0.105953
285	0.0983806	0.101106	0.106314	0.104071
290	0.0993813	0.0975234	0.104478	0.103867
295	0.0970978	0.0974323	0.102066	0.102824
300	0.0981474	0.0957304	0.100155	0.100852
305	0.0968995	0.0955111	0.101546	0.10128
310	0.0958642	0.0951083	0.101476	0.100383
315	0.0953136	0.0938905	0.100785	0.0993728
320	0.0926485	0.0945337	0.0982127	0.0978575
325	0.092719	0.091828	0.0991368	0.0981898
330	0.0909574	0.0927487	0.0972145	0.0960656
335	0.0908862	0.0919813	0.09484	0.0957865
340	0.0916238	0.0910274	0.0955764	0.0941304
345	0.0900666	0.0876604	0.0955378	0.0939567
350	0.0878599	0.0905274	0.093844	0.0946547
355	0.0876239	0.08847	0.0937406	0.0926324
360	0.0876887	0.090793	0.0927951	0.0939549
365	0.0878161	0.0862795	0.0918975	0.0928045
370	0.0865842	0.0864549	0.0910119	0.0890374
375	0.0850515	0.0864198	0.0902435	0.0890078
380	0.0861037	0.0833832	0.0897751	0.0889602
385	0.0848208	0.084716	0.0894326	0.0884801
390	0.0838081	0.0847191	0.0883219	0.0882591
395	0.0843129	0.0836781	0.0890394	0.0862876
400	0.0821816	0.0804907	0.0882154	0.0847922
405	0.0797286	0.0831784	0.0871779	0.084219
410	0.0792589	0.0808416	0.0867113	0.0855995
415	0.0799071	0.0793848	0.0840673	0.0851086
420	0.0793665	0.0791903	0.0837089	0.0835737
425	0.0808094	0.0789357	0.0844031	0.0841949
430	0.0781841	0.0779986	0.083873	0.0833296
435	0.0793858	0.0803016	0.0829478	0.0820789
440	0.0771134	0.0762192	0.0823818	0.0824003
445	0.0769593	0.0765235	0.0818716	0.0811069
450	0.0755102	0.0759125	0.079024	0.0807008
455	0.0775796	0.077663	0.081902	0.0800153
460	0.0753521	0.0768323	0.0816166	0.0778959
465	0.0744848	0.0729031	0.078677	0.079063
470	0.0750128	0.0763762	0.0782692	0.0789132
475	0.0749831	0.0748168	0.0767951	0.0795032
480	0.0735462	0.0731072	0.0769906	0.0777902
485	0.0731382	0.0739102	0.0779968	0.0766854
490	0.0714386	0.07287	0.0757833	0.0760404
495	0.0740024	0.0725562	0.0770011	0.0746372
500	0.0727036	0.068743	0.0749839	0.0758538
505	0.0712608	0.0711901	0.0748909	0.0749182
510	0.0700785	0.0705509	0.0742252	0.073491
515	0.0708722	0.0705267	0.0739855	0.0728036
520	0.0701514	0.0709208	0.0725198	0.0731895
525	0.0703338	0.0703969	0.0735003	0.0721215
530	0.0682333	0.0686927	0.0732794	0.073124
535	0.0664257	0.0679087	0.0715893	0.0733352
540	0.0701659	0.066978	0.0703782	0.0707755
545	0.0681358	0.0668519	0.0719421	0.0710567
550	0.0661946	0.066903	0.0706833	0.0686536
555	0.0675495	0.0656869	0.0698065	0.0678443
560	0.0659817	0.0666006	0.0695004	0.0680873
565	0.0670868	0.0661072	0.0708769	0.0694007
570	0.0665519	0.0651589	0.0690533	0.0690031
575	0.0651782	0.0645709	0.0691423	0.0681479
580	0.0646153	0.0637906	0.0692219	0.0696073
585	0.0645535	0.0650133	0.068978	0.0710518
590	0.0622751	0.0624046	0.0692051	0.0674538
595	0.0639112	0.0605751	0.0677213	0.068706
600	0.0635004	0.0628539	0.0669587	0.0660808
605	0.0629661	0.0604704	0.0673713	0.0674384
610	0.0610769	0.0628428	0.0656846	0.0654514
615	0.0624693	0.060923	0.0649138	0.0654155
620	0.0589708	0.0606	0.0652578	0.0623885
625	0.0588034	0.0599598	0.065822	0.0640313
630	0.0624025	0.0606992	0.0648395	0.0653478
635	0.0616416	0.0595455	0.0650645	0.0642406
640	0.058979	0.05949	0.0644704	0.0630869
645	0.0594581	0.0586824	0.0632961	0.0639799
650	0.0599474	0.0590984	0.0636668	0.063393
655	0.0608271	0.0569228	0.0643058	0.0627859
660	0.0587546	0.0577578	0.0637582	0.0625541
665	0.0585771	0.0581724	0.0626627	0.0634312
670	0.0584774	0.0580175	0.061695	0.0619417
675	0.0553382	0.0566819	0.0607019	0.0605488
680	0.0576508	0.0554212	0.0614805	0.0602628
685	0.0570468	0.0551284	0.0616109	0.0615075
690	0.0558999	0.0542515	0.0603313	0.0599126
695	0.0552798	0.0554272	0.0588165	0.0596048
700	0.0581146	0.0568927	0.0597149	0.0589003
705	0.0554588	0.0563786	0.0617255	0.0584717
710	0.0548717	0.0547957	0.0577154	0.0574181
715	0.0547403	0.0563459	0.0585199	0.0587326
720	0.0545672	0.0541544	0.0585238	0.0598226
725	0.0536989	0.0539988	0.0582994	0.0602209
730	0.0559429	0.0531637	0.0582125	0.0577297
735	0.0525721	0.0535559	0.0586144	0.0571563
740	0.0534682	0.0523557	0.0564473	0.0580359
745	0.0530484	0.0523689	0.0571659	0.0585423
750	0.0540398	0.0532677	0.0552423	0.0554907
755	0.0524788	0.0518241	0.057694	0.0571136
760	0.0530776	0.053609	0.0572256	0.0565116
765	0.0519117	0.0536682	0.059434	0.0548354
770	0.0521125	0.0500832	0.0568848	0.0557667
775	0.0525913	0.0516337	0.0557213	0.0550586
780	0.0534633	0.052201	0.0574779	0.0559671
785	0.0517667	0.0508073	0.0559605	0.055712
790	0.0514827	0.0503937	0.0534329	0.0545789
795	0.0512052	0.0497501	0.0542321	0.0537826
800	0.0503396	0.0500915	0.0542395	0.0557788
805	0.051432	0.0499063	0.0532323	0.0561575
810	0.0512375	0.0502946	0.0541606	0.0535281
815	0.0504752	0.0499102	0.0564644	0.0534766
820	0.050518	0.0484048	0.0522451	0.0540472
825	0.0497835	0.0503423	0.05309	0.0536275
830	0.0486717	0.048745	0.0544477	0.0515855
835	0.0487356	0.0475358	0.0531496	0.0530437
840	0.0496594	0.0464038	0.0538275	0.0518832
845	0.0489835	0.0478937	0.0523563	0.0532114
850	0.0480696	0.0486241	0.0519938	0.0504174
855	0.0481883	0.0466887	0.0517323	0.0518691
860	0.0473236	0.0465145	0.0540281	0.0540898
865	0.0481358	0.0465206	0.0506703	0.0513986
870	0.0467793	0.0474394	0.052129	0.0527674
875	0.0469402	0.0449223	0.0496638	0.0497875
880	0.045155	0.0470641	0.0509381	0.0509448
885	0.0468777	0.0476362	0.0517056	0.0512383
890	0.0468504	0.0460789	0.0515954	0.0520936
895	0.0463471	0.04552	0.0496802	0.0499395
900	0.0463783	0.0481647	0.0506514	0.0513521
905	0.0465199	0.0449517	0.0489223	0.049981
910	0.0463371	0.0447743	0.0503496	0.0482851
915	0.0447329	0.0462724	0.0508082	0.0505708
920	0.0448816	0.0458573	0.0484052	0.0504616
925	0.0455424	0.0431972	0.0487527	0.0500035
930	0.0453467	0.0429984	0.0493906	0.048036
935	0.0447238	0.0426818	0.0488212	0.0493289
940	0.0444072	0.0449648	0.0469967	0.0494045
945	0.0439109	0.0425787	0.0484204	0.0477425
950	0.0436008	0.0431351	0.0475503	0.0481337
955	0.0451514	0.0437104	0.0467986	0.0478627
960	0.0442744	0.043025	0.0496851	0.0465103
965	0.0428852	0.0418936	0.0482455	0.0485694
970	0.0425524	0.0423993	0.048156	0.0481483
975	0.0434828	0.0433562	0.0468377	0.0455787
980	0.0423002	0.0441299	0.0480988	0.0473314
985	0.0437284	0.041774	0.0469349	0.0469906
990	0.0428913	0.0430657	0.0473987	0.0480575
995	0.0412246	0.0410335	0.0470233	0.0465784
1000	0.0413412	0.0417865	0.0462696	0.0469878
1005	0.0404585	0.0414822	0.0465672	0.0477598
1010	0.0422611	0.0413342	0.0461935	0.0463195
1015	0.0415638	0.0409412	0.0449243	0.0448403
1020	0.0396411	0.0424972	0.0462091	0.0460768
1025	0.0403035	0.0415538	0.045417	0.0442688
1030	0.0415133	0.0405931	0.0454208	0.0432782
1035	0.0419471	0.0398382	0.0448065	0.0465436
1040	0.0410533	0.0414281	0.0455471	0.0466841
1045	0.0417229	0.0404521	0.0450436	0.0449364
1050	0.0402132	0.0399805	0.0460956	0.0452991
1055	0.0393223	0.0392735	0.0457317	0.0444923
1060	0.0413643	0.0381852	0.0447342	0.0447034
1065	0.0400016	0.0410036	0.0466675	0.0445332
1070	0.0405961	0.0394191	0.0448609	0.0446969
1075	0.0394596	0.0388428	0.0439409	0.0430407
1080	0.0398701	0.0388905	0.0448699	0.0440757
1085	0.0408315	0.0399285	0.0433938	0.0433212
1090	0.0391161	0.0377908	0.0442722	0.0445056
1095	0.0396972	0.0371811	0.0447347	0.0436589
1100	0.0389666	0.039682	0.0441053	0.0447201
1105	0.0407178	0.0385458	0.044041	0.0424814
1110	0.0384168	0.0373677	0.044456	0.0428455
1115	0.0403484	0.0381917	0.0432337	0.0432194
1120	0.0376161	0.0372209	0.0446523	0.0419651
1125	0.0379817	0.0377496	0.0410348	0.0432356
1130	0.0379891	0.0363052	0.0438994	0.0431145
1135	0.0383956	0.0376298	0.0434083	0.0418259
1140	0.0378154	0.0365244	0.0406724	0.0421996
1145	0.0383947	0.0363695	0.0413107	0.0432202
1150	0.038266	0.0368423	0.043033	0.0396905
1155	0.0367993	0.0349971	0.0421041	0.0405532
1160	0.0360785	0.0372687	0.0425514	0.0427299
1165	0.0363172	0.0366268	0.0419811	0.0427807
1170	0.035382	0.0362853	0.0413016	0.0422131
1175	0.0370423	0.0361457	0.0407157	0.0396965
1180	0.0364287	0.0354346	0.0416412	0.0408568
1185	0.0376899	0.0360891	0.0406107	0.0425182
1190	0.0356438	0.0360051	0.0419104	0.0419764
1195	0.0364924	0.0365583	0.0425789	0.0413263
1200	0.035684	0.0333954	0.0418844	0.0396044
1205	0.0362156	0.0358848	0.0408044	0.0410317
1210	0.0345402	0.0369977	0.0390319	0.0413374
1215	0.0351881	0.0337059	0.0414546	0.0409961
1220	0.033756	0.0363143	0.0403468	0.0394249
1225	0.0356537	0.0341373	0.0405247	0.0404303
1230	0.0364546	0.0354099	0.0413632	0.0391685
1235	0.0353689	0.035885	0.0403931	0.0384589
1240	0.0353211	0.0336041	0.039364	0.0403062
1245	0.0354692	0.0341034	0.0391167	0.0387462
1250	0.0345363	0.034868	0.0384533	0.0388226
1255	0.0352216	0.0352677	0.0405536	0.0378618
1260	0.0337257	0.0326674	0.0390816	0.0390247
1265	0.0347127	0.0339208	0.0397239	0.0388837
1270	0.0334939	0.0341717	0.0379589	0.0382364
1275	0.0336699	0.0339132	0.0383117	0.0383258
1280	0.0339792	0.0349715	0.0408024	0.0379053
1285	0.0335902	0.0353372	0.0388798	0.0371541
1290	0.0331218	0.0343324	0.0406611	0.0382407
1295	0.0341323	0.0326758	0.037931	0.0376328
1300	0.0328805	0.0331448	0.0386541	0.0385101
1305	0.0325236	0.0347902	0.0391016	0.0384421
1310	0.0329577	0.0323803	0.0390991	0.0375826
1315	0.0322865	0.0316185	0.0376583	0.0392293
1320	0.033253	0.0321034	0.0393383	0.037399
1325	0.0336671	0.0327077	0.0378029	0.0372164
1330	0.0332396	0.0328071	0.0385344	0.0375425
1335	0.033966	0.0314011	0.0371812	0.0360458
1340	0.0344546	0.0315465	0.0381959	0.0359112
1345	0.0331456	0.0299423	0.0386981	0.037427
1350	0.0316844	0.0319578	0.0382544	0.0385131
1355	0.0324527	0.0324195	0.0383406	0.0375157
1360	0.0322556	0.0312821	0.0392405	0.0359571
1365	0.0320748	0.0311121	0.0383049	0.0378997
1370	0.0348701	0.031798	0.0372184	0.0375744
1375	0.0318109	0.0310056	0.0372884	0.0369346
1380	0.0328702	0.0313023	0.0382323	0.0352286
1385	0.031387	0.0300327	0.0358063	0.0373729
1390	0.0303378	0.0294844	0.0372681	0.0362232
1395	0.0318631	0.0310292	0.0370068	0.0373003
1400	0.0322446	0.0315039	0.0370013	0.0353183
1405	0.0311348	0.030395	0.0386041	0.0379781
1410	0.0302077	0.0305507	0.0379377	0.0366169
1415	0.0315347	0.0314019	0.0371919	0.0373955
1420	0.0320024	0.0317361	0.0372525	0.0344031
1425	0.0302412	0.0304667	0.0335474	0.0376388
1430	0.0324208	0.0313919	0.0373489	0.0369884
1435	0.0304792	0.0298165	0.0358273	0.0332277
1440	0.031072	0.0301249	0.0382704	0.0357552
1445	0.0314529	0.030972	0.0342159	0.0351845
1450	0.0291082	0.0305651	0.0354496	0.0347394
1455	0.0296273	0.0280021	0.0371517	0.0332074
1460	0.0296695	0.0305331	0.0353603	0.035227
1465	0.0323738	0.029764	0.0348052	0.0350413
1470	0.0298562	0.0281395	0.0368033	0.0352453
1475	0.0304049	0.0298158	0.034917	0.0349226
1480	0.0307	0.0294059	0.0349015	0.0343448
1485	0.0297792	0.0291074	0.0339783	0.0362395
1490	0.0296888	0.0299071	0.035156	0.0350289
1495	0.0287437	0.0290695	0.0344823	0.0351069
1500	0.0297858	0.0292999	0.0344364	0.0356983
1505	0.027027	0.0273817	0.0353613	0.0336295
1510	0.0293882	0.0273886	0.035395	0.0347787
1515	0.0290323	0.0277877	0.0341664	0.0356475
1520	0.0288692	0.028599	0.0336732	0.0336272
1525	0.0273111	0.0291524	0.036141	0.0333918
1530	0.0289304	0.0284867	0.0338298	0.0325962
1535	0.0282155	0.0273659	0.0345281	0.0354338
1540	0.0288503	0.0280028	0.0345688	0.034757
1545	0.0267181	0.0286083	0.034803	0.0366571
1550	0.0300971	0.0283999	0.0338127	0.0332087
1555	0.0287859	0.0266919	0.0339147	0.0344795
1560	0.0287279	0.0283478	0.0326255	0.0344102
1565	0.0273838	0.0291864	0.0344136	0.0339774
1570	0.0285405	0.0284479	0.0335276	0.033288
1575	0.0292772	0.0268823	0.0347537	0.0344355
1580	0.0267764	0.0271264	0.0328842	0.0339268
1585	0.0283412	0.0272845	0.0360815	0.0323899
1590	0.0288255	0.0294453	0.0330851	0.0333973
1595	0.0283914	0.0261073	0.0340352	0.0343847
1600	0.0295254	0.0271939	0.0325475	0.0335846
1605	0.0262268	0.0281073	0.0354022	0.034921
1610	0.0274591	0.0266072	0.0325031	0.034161
1615	0.0264765	0.0261343	0.0347914	0.0339884
1620	0.028397	0.0277367	0.0330999	0.0318828
1625	0.0267834	0.0269846	0.0316177	0.0314177
1630	0.0275179	0.0266686	0.0344449	0.0316366
1635	0.028102	0.026759	0.0325916	0.0326917
1640	0.0283395	0.0269496	0.0342345	0.0333459
1645	0.028427	0.0272184	0.0325025	0.0313502
1650	0.0272687	0.0267371	0.0336563	0.030768
1655	0.0279802	0.026554	0.0338345	0.031868
1660	0.0269719	0.0256076	0.0340119	0.0339401
1665	0.0284138	0.025944	0.0301686	0.0339862
1670	0.026527	0.0269499	0.0313339	0.0317505
1675	0.0273859	0.0270238	0.0317747	0.0307817
1680	0.025115	0.0266934	0.0328283	0.0333596
1685	0.0278175	0.0251514	0.0329257	0.0310882
1690	0.0259172	0.0258928	0.0338807	0.0334745
1695	0.0261425	0.0264742	0.0309616	0.032301
1700	0.0252723	0.0260909	0.0327378	0.031208
1705	0.0264559	0.0252244	0.0316496	0.0318989
1710	0.025872	0.0254979	0.0332488	0.0323597
1715	0.0250789	0.0240125	0.0318258	0.0316857
1720	0.0264586	0.0262381	0.0313215	0.0313799
1725	0.0246255	0.0247053	0.0322432	0.0322881
1730	0.0264911	0.0242994	0.0319873	0.0313475
1735	0.0259745	0.0271056	0.0325367	0.0319803
1740	0.0264878	0.0249814	0.0317763	0.0334033
1745	0.0254162	0.0246075	0.0306178	0.0309188
1750	0.025315	0.0255092	0.0319758	0.0308082
1755	0.0259253	0.0245651	0.0302587	0.0294356
1760	0.025614	0.024027	0.0297445	0.0314859
1765	0.0259726	0.0242349	0.0322255	0.0318145
1770	0.0245703	0.0232622	0.0304206	0.0312371
1775	0.0263233	0.0249786	0.0324052	0.0321568
1780	0.0240986	0.0252108	0.0310813	0.0310634
1785	0.0252848	0.0232094	0.0303372	0.0304782
1790	0.0245174	0.0242656	0.0322135	0.0323932
1795	0.0253058	0.0249412	0.0297268	0.0320772
1800	0.0260794	0.0243711	0.0295575	0.0309063
1805	0.0237638	0.0246015	0.0307872	0.0308278
1810	0.0251554	0.0228377	0.0290467	0.030131
1815	0.024526	0.0253161	0.0299771	0.0321473
1820	0.0238724	0.0249324	0.0313744	0.0311364
1825	0.0253049	0.0245911	0.0307718	0.0307779
1830	0.0236684	0.024575	0.0303318	0.0302356
1835	0.0241933	0.0233176	0.0319032	0.0317999
1840	0.0249401	0.0245106	0.0284051	0.030434
1845	0.0242453	0.0248064	0.0309093	0.0297768
1850	0.0237003	0.0235254	0.0289489	0.0299149
1855	0.0236739	0.0231271	0.0304404	0.0298174
1860	0.0253298	0.0230659	0.0295829	0.0292084
1865	0.0240142	0.0224063	0.0303913	0.0297864
1870	0.0247032	0.0238698	0.0305146	0.0288982
1875	0.0234455	0.0242768	0.0291401	0.0295898
1880	0.0259682	0.0228481	0.030072	0.0297469
1885	0.0238983	0.022821	0.0273515	0.0292685
1890	0.023843	0.022407	0.0281568	0.0301251
1895	0.0243811	0.0230287	0.0288027	0.0284981
1900	0.0235022	0.0229042	0.0278459	0.0299852
1905	0.0230511	0.0221893	0.0298207	0.0290375
1910	0.0239644	0.0223855	0.0292268	0.0290749
1915	0.0227641	0.0214971	0.0301363	0.030689
1920	0.0238566	0.0231173	0.0293408	0.029271
1925	0.0245621	0.0238114	0.0294299	0.0290667
1930	0.0239648	0.0217553	0.0304749	0.0273932
1935	0.0255225	0.0229086	0.030866	0.0274873
1940	0.0226642	0.0231516	0.0304622	0.0300728
1945	0.0230084	0.0234647	0.0294891	0.0310231
1950	0.0217424	0.0230409	0.0287558	0.0314407
1955	0.0230837	0.0218351	0.0279313	0.0281758
1960	0.0225464	0.0230149	0.0277111	0.0302547
1965	0.0223149	0.0223658	0.0266633	0.0304295
1970	0.0214875	0.0216042	0.0270416	0.0303354
1975	0.0212436	0.0227671	0.0294519	0.0286544
1980	0.0232056	0.0208491	0.0284889	0.0290229
1985	0.0240618	0.0230779	0.0286097	0.0292908
1990	0.0238923	0.0213242	0.0298128	0.0287362
1995	0.0237703	0.0222007	0.0287809	0.0286149
2000	0.022583	0.0225869	0.0292855	0.0276589
2005	0.0227168	0.0200894	0.0298629	0.0283772
2010	0.0233845	0.0220322	0.0290751	0.0294647
2015	0.023273	0.0222248	0.0279904	0.0281611
2020	0.0217351	0.0217154	0.02895	0.0291414
2025	0.0224544	0.022724	0.029612	0.0293081
2030	0.0229737	0.0217349	0.0263779	0.0284059
2035	0.0226313	0.0225694	0.0277747	0.0280468
2040	0.0228069	0.0203838	0.0289557	0.0288391
2045	0.0222872	0.0232959	0.0290448	0.0295259
2050	0.0218693	0.0223264	0.0271773	0.028074
2055	0.0219862	0.0212329	0.0291084	0.0263448
2060	0.0222749	0.0219585	0.0285291	0.0276286
2065	0.0215641	0.0224234	0.0295811	0.0305886
2070	0.0214429	0.0226066	0.0266576	0.0279285
2075	0.0201217	0.0225539	0.0272231	0.0272993
2080	0.0210678	0.0220244	0.0272244	0.0262805
2085	0.0223226	0.0203529	0.0274501	0.0286785
2090	0.0222767	0.0217889	0.0280787	0.0269643
2095	0.0214649	0.0213521	0.0291022	0.0283215
2100	0.0204778	0.0195335	0.0268789	0.0276716
2105	0.0224375	0.021472	0.0273652	0.0285418
2110	0.0221046	0.0212499	0.0281238	0.0272241
2115	0.0217191	0.0221824	0.0278671	0.0274925
2120	0.0226927	0.0216476	0.026649	0.0282642
2125	0.0220635	0.0195644	0.0274596	0.0271355
2130	0.022266	0.0211945	0.0287464	0.0279367
2135	0.0230953	0.0203671	0.0282142	0.027805
2140	0.0218172	0.0213576	0.0281562	0.029515
2145	0.0199336	0.0219636	0.0258222	0.0265793
2150	0.0215711	0.0215892	0.0272153	0.0278957
2155	0.0202552	0.0208699	0.0283349	0.027953
2160	0.0206002	0.0193602	0.0275916	0.0253146
2165	0.0219225	0.0196426	0.026437	0.0273505
2170	0.0208489	0.0217039	0.0284489	0.0264436
2175	0.0210382	0.0205103	0.0263063	0.0268685
2180	0.0195516	0.0212127	0.0280262	0.0264061
2185	0.0204691	0.0217013	0.0260222	0.0272482
2190	0.0211386	0.0213622	0.028169	0.0272844
2195	0.0217471	0.0199256	0.0258552	0.0276472
2200	0.0214772	0.0200962	0.0270694	0.025078
2205	0.0208948	0.021852	0.0274213	0.0253639
2210	0.0204021	0.0217785	0.0261436	0.0265094
2215	0.0213059	0.0204097	0.026911	0.0276507
2220	0.0196228	0.0206977	0.0260752	0.0266478
2225	0.0197311	0.0206449	0.0260156	0.0257314
2230	0.020605	0.0190146	0.0260449	0.0283396
2235	0.0215473	0.0203124	0.0283568	0.0259983
2240	0.0208824	0.0184681	0.0269614	0.0258146
2245	0.0206391	0.0184283	0.0264486	0.0254205
2250	0.0200201	0.0184208	0.0274073	0.026534
2255	0.0217263	0.0193136	0.0254685	0.0260124
2260	0.0203878	0.017824	0.0266701	0.0273162
2265	0.0198389	0.020763	0.0256354	0.0285405
2270	0.0210923	0.0192226	0.025397	0.027576
2275	0.020764	0.0196315	0.0266132	0.0282614
2280	0.0198645	0.0171931	0.0267695	0.0258959
2285	0.0193232	0.0207414	0.0252811	0.0266343
2290	0.0198845	0.0217863	0.0247906	0.0254744
2295	0.0207206	0.0205059	0.026048	0.0265955
2300	0.0191596	0.017417	0.0262088	0.0259519
2305	0.0219162	0.01968	0.0248551	0.0246868
2310	0.0207527	0.0219488	0.0276257	0.0249851
2315	0.0205617	0.0191282	0.026997	0.0277932
2320	0.0207581	0.0188544	0.0260428	0.0262774
2325	0.0192322	0.0187238	0.0260883	0.0262695
2330	0.0204481	0.0186618	0.0247069	0.0268455
2335	0.0192301	0.0184956	0.0264596	0.025642
2340	0.0192874	0.0191122	0.0266905	0.0255451
2345	0.0179945	0.0198927	0.0254981	0.0251578
2350	0.0187047	0.0191022	0.0272469	0.0269938
2355	0.0195511	0.0176699	0.0265667	0.025418
2360	0.0193993	0.0189864	0.0276481	0.0265382
2365	0.020651	0.0191498	0.0248323	0.0254437
2370	0.0194722	0.0187027	0.0249326	0.0263074
2375	0.0206436	0.0200926	0.0250747	0.0279164
2380	0.0196275	0.0202815	0.0255292	0.0252868
2385	0.018628	0.0182005	0.0238865	0.0261111
2390	0.0199559	0.0185726	0.0251583	0.0259128
2395	0.0186706	0.0186532	0.025719	0.0262876
2400	0.0182344	0.0193772	0.026231	0.0264827
