# Supplementary material for: Specific lid-base contacts in the 26s proteasome control the conformational switching required for substrate degradation
Source: eLife. 2019 Nov 28;8:e49806. doi: 10.7554/eLife.49806 (PMC6910829; doi:10.7554/eLife.49806)
Supplement: Figure 3—figure supplement 1—source data 1. [file elife-49806-fig3-figsupp1-data1.xlsx]

## Sheet: Figure3B & Supplement 1B
	26S ATPase Rates (ATP/enzyme/min)						26S+ Ub-Ubp6 ATPase rate (ATP/enzyme/min)
		Trial 1	Trial 2	Trial 3	Trial 4	Trial 5		Trial 1	Trial 2	Trial 3	Trial 4	Trial 5		26S Average ATPase rate (ATP/enzyme/min)	SEM	26S+ Ub-Ubp6 ATPase rate (ATP/enzyme/min)	SEM
	Wild-type	26.7871	24.4362	11.2039	10.4334	20.61	Wild-type	59.3681	63.3005	18.4591	23.5955	38.8443	Wild-type	18.6941	0.831142	40.7135	1.3903
	Rpt1-EQ	51.0433	39.8074	44.9438			Rpt1-EQ	137.079	93.4189	101.766			Rpt1-EQ	45.2648	3.24751	110.754	13.3808
	Rpt2-EQ	109.149	126.164	132.263			Rpt2-EQ	209.31	172.713	219.904			Rpt2-EQ	122.525	6.91597	200.642	14.2956
	Rpt6-EQ	125.855	106.484	119.397			Rpt6-EQ	132.141	114.279	124.549			Rpt6-EQ	112.93	5.59178	119.971	5.15614
	Rpt3-EQ	59.7111	50.7223	52.9695			Rpt3-EQ	103.692	67.7368	97.9133			Rpt3-EQ	54.4676	2.70079	89.7806	11.1475
	Rpt4-EQ	97.5923	84.1091	82.825			Rpt4-EQ	116.533	74.7994	96.6292			Rpt4-EQ	88.1755	4.72297	95.9872	12.0517
	Rpt5-EQ	61.3162	114.286	74.1573			Rpt5-EQ	81.2199	112.681	114.286			Rpt5-EQ	72.2311	5.82586	113.751	0.535045
	ATPase Fold Stimulation to Ubiquitin bound Ubp6
		Average Fold ATPase Stimulation	n	Standard Deviation	SEM
	Wild-type	2.12011	5	0.363717	0.162659
	Rpt1-EQ	2.4322	3	0.223239	0.128887
	Rpt2-EQ	1.64974	3	0.274572	0.158524
	Rpt6-EQ	1.05543	3	0.0157614	0.00909985
	Rpt3-EQ	1.64016	3	0.269763	0.155748
	Rpt4-EQ	1.08335	3	0.168602	0.0973421
	Rpt5-EQ	1.2839	3	0.279815	0.161551

## Sheet: Figure3C
		Ubiquitin-AMC cleavage per Ubp6 per minute					versus WT ATP	versus nucleotide change		Sample	Average Rate (Ubiquitin-AMC cleaved per Ubp6 per min)	SEM
sample	rate 1	rate 2	rate 3	average		p=	p=			Wild-tγpe ATP	18.5072	1.03175
Wild-tγpe ATP	16.0036	23.3374	18.2838	19.2083		NA				Wildtγpe ATPγS	30.6121	1.51948
Wildtγpe ATPγS	29.34	37.6586	31.428	32.8089		0.015	0.015
										Rpt2-EQ ATP	24.5841	1.71654
Rpt2-EQ ATP	23.467	27.954	22.3313	24.5841		0.124				Rpt2-EQ ATPγS	29.8067	2.47488
Rpt2-EQ ATPγS	28.3565	34.6304	26.4334	29.8067			0.158
										Rpt3-EQ ATP	25.8607	4.68442
Rpt3-EQ ATP	18.6708	34.6577	24.2537	25.8607		0.267				Rpt3-EQ ATPγS	31.45	3.87943
Rpt3-EQ ATPγS	25.62	38.7988	29.9313	31.45			0.41
										Rpt5-EQ ATP	27.2948	0.369101
Rpt5-EQ ATP	28.0313	26.9688	26.8841	27.2948		0.021				Rpt5-EQ ATPγS	33.4823	0.557775
Rpt5-EQ ATPγS	34.501	32.5792	33.3665	33.4823			0.001
										Rpt6-EQ ATP	37.4819	1.5096
Rpt6-EQ ATP	40.4717	35.6228	36.3513	37.4819		0.002				Rpt6-EQ ATPγS	34.0648	2.43574
Rpt6-EQ ATPγS	36.7533	29.2023	36.2387	34.0648			0.299
										Rpt1-EQ ATP	18.4641	0.492406
										Rpt1-EQ ATPγS	27.4829	0.796024
Wild-tγpe ATP	18.5073	17.6487	17.2624	17.8061
Wildtγpe ATPγS	29.7665	27.5056	27.9737	28.4153		0				Rpt4-EQ ATP	25.704	0.781246
										Rpt4-EQ ATPγS	27.9739	0.509719
Rpt1-EQ ATP	17.9004	19.4453	18.0467	18.4641		0.345
Rpt1-EQ ATPγS	26.4152	26.994	29.0395	27.4829			0.001
Rpt4-EQ ATP	24.9445	24.9013	27.2663	25.704		0.001
Rpt4-EQ ATPγS	28.4127	26.9576	28.5514	27.9739			0.072

## Sheet: Figure3D
		Averaged rate (au/s)	Standard deviation	n	SEM	Average rate normalized to Wild-type (%)	SEM normalized
	Wild-type ATP	503.615	117.989	5	52.7661	1	0.234283
	Wild-type ATPyS	981.855	88.6414	3	51.1771	1.94962	0.17601
	Rpt4-EQ ATP	508.092	140.798	6	57.4804	1.00889	0.279574
	Rpt4-EQ ATPyS	461.987	99.7814	6	40.7356	0.917341	0.19813
	Rpt6-EQ ATP	1065.04	238.743	6	97.4666	2.11479	0.47406
	Rpt6-EQ ATPyS	1026.96	116.838	3	67.4567	2.03918	0.231999
	Rpn5-VTENKIF ATP	659.992	41.4116	3	23.909	1.31051	0.0822287
	Rpn5-VTENKIF ATPyS	856.823	24.5593	3	14.1793	1.70135	0.0487661
	Rpt6-EQ + Rpn5-VTENKIF ATP	985.079	105.323	3	60.8084	1.95602	0.209135
	Rpt6-EQ + Rpn5-VTENKIF ATPyS	858.143	146.864	3	84.7921	1.70397	0.29162

## Sheet: Figure3 Supplement 2
Dataset	Averaged rate (au/s)	Standard deviation	Normalized to Wild-type (%)	Standard Deviation Normalized	SEM
Wild-type ATP	503.615	117.989	100	23.4283	13.5264
Wild-type ATP 2X Base	464.476	81.0543	92.2284	16.0945	9.29216
Rpt4-EQ ATP	508.092	140.798	100.889	13.1754	7.60683
Rpt4-EQ ATP 2X Base	594.547	110.154	118.056	21.8726	12.6281
Rpt6-EQ ATP	1065.04	238.743	211.479	47.406	27.3698
Rpt6-EQ ATP 2X Base	966.282	126.19	191.869	25.0568	14.4666
