# Supplementary material for: Specific lid-base contacts in the 26s proteasome control the conformational switching required for substrate degradation
Source: eLife. 2019 Nov 28;8:e49806. doi: 10.7554/eLife.49806 (PMC6910829; doi:10.7554/eLife.49806)
Supplement: Figure 4—figure supplement 1—source data 1. [file elife-49806-fig4-figsupp1-data1.xlsx]

## Sheet: Figure 4A
	Substrate [μM]	Wildtype (substrate/enzyme/min)	Rpn5-VTENKIF (substrate/enzyme/min)	Rpt6-EQ (substrate/enzyme/min)	Rpt4-EQ (substrate/enzyme/min)
	5	0.235198	0.0362567	0.03991	0
	3	0.245164	ND	ND	0
	2.5	0.208081	0.0382938	0.0430062	0
	1.5	0.181946	ND	ND	0
	1.25	0.240157	0.0349529	0.0439056	0
	0.75	0.23114	0.0237496	0.0340404	0
	0.625	0.20842	0.026229	0.036993	0
	0.375	0.135181	0.0197649	0.0305403	0
	0.3125	0.132538	0.0192186	0.0315826	0
	0.1875	0.0868634	0.0132219	0.0210497	0
	0.15625	0.0764239	0.0115238	0.0199354	0
	0.09375	0.0438483	0.00733188	0.0130762	0
	0	0	0	0	0

## Sheet: Figure 4B
Anisotropy	Time (s)	Wild-type	Rpt-EQ	TitinV15P-FAM substrate alone
	0	170.767	164.502	168.413
	4	170.767	162.942	166.847
	8	166.847	164.502	164.502
	12	164.502	162.162	165.283
	16	159.827	162.162	166.065
	20	155.172	161.383	162.162
	24	150.538	160.605	162.942
	28	146.691	158.273	161.383
	32	143.623	155.947	160.605
	36	139.8	158.273	161.383
	40	138.275	156.722	158.273
	44	132.954	159.05	159.827
	48	132.196	155.947	158.273
	52	126.905	156.722	158.273
	56	126.152	155.947	158.273
	60	125.399	155.947	156.722
	64	125.399	154.399	155.947
	68	123.894	152.853	157.497
	72	120.141	153.625	154.399
	76	116.402	153.625	155.947
	80	114.165	151.309	155.172
	84	115.656	150.538	154.399
	88	112.676	151.309	155.947
	92	111.932	151.309	153.625
	96	111.932	152.08	153.625
	100	109.705	151.309	151.309
	104	108.963	150.538	151.309
	108	108.222	150.538	155.172
	112	108.222	149.767	152.853
	116	105.263	149.767	152.08
	120	106.002	149.767	152.853
	124	106.002	149.767	152.08
	128	104.525	151.309	151.309
	132	102.313	148.997	152.853
	136	103.049	150.538	152.853
	140	104.525	148.997	152.853
	144	104.525	149.767	151.309
	148	101.576	148.997	151.309
	152	103.787	149.767	151.309
	156	100.84	148.997	153.625
	160	102.313	148.228	152.853
	164	99.3702	148.997	151.309
	168	99.3702	147.459	152.08
	172	98.6359	149.767	152.853
	176	98.6359	147.459	151.309
	180	98.6359	148.228	150.538
	184	97.9021	148.228	151.309
	188	99.3702	147.459	151.309
	192	101.576	147.459	152.853
	196	101.576	148.997	152.853
	200	98.6359	148.997	150.538
	204	100.84	148.228	151.309
	208	100.84	147.459	152.853
	212	99.3702	149.767	152.08
	216	98.6359	147.459	150.538
	220	97.9021	148.997	150.538
	224	100.105	147.459	149.767
	228	100.105	148.228	151.309
	232	97.9021	149.767	152.853
	236	97.1688	146.691	152.853
	240	99.3702	147.459	151.309
	244	99.3702	148.228	152.08
	248	96.4361	148.228	151.309
	252	96.4361	146.691	153.625
	256	97.9021	148.228	152.853
	260	97.1688	145.923	151.309
	264	95.7038	145.923	152.08
	268	96.4361	147.459	149.767
	272	96.4361	149.767	151.309
	276	96.4361	147.459	151.309
	280	94.2408	148.228	152.08
	284	94.9721	147.459	151.309
	288	94.2408	147.459	152.08
	292	94.9721	145.923	152.08
	296	94.9721	148.228	153.625
	300	94.2408	145.923	150.538
	304	94.2408	148.997	151.309
	308	92.7799	148.228	151.309
	312	94.2408	145.156	152.08
	316	92.7799	145.923	150.538
	320	92.0502	145.923	151.309
	324	92.7799	146.691	150.538
	328	92.0502	145.923	150.538
	332	92.7799	146.691	151.309
	336	92.0502	147.459	152.08
	340	93.5101	146.691	151.309
	344	90.5923	147.459	149.767
	348	92.0502	147.459	150.538
	352	92.7799	145.923	149.767
	356	92.7799	145.923	150.538
	360	91.321	146.691	152.853
	364	90.5923	145.156	149.767
	368	91.321	145.923	152.08
	372	90.5923	146.691	149.767
	376	88.4093	144.389	150.538
	380	88.4093	146.691	152.853
	384	90.5923	145.923	150.538
	388	90.5923	145.156	150.538
	392	91.321	145.923	149.767
	396	91.321	146.691	151.309
	400	90.5923	145.156	149.767
	404	87.6827	143.623	150.538
	408	88.4093	145.156	152.08
	412	91.321	144.389	149.767
	416	87.6827	143.623	151.309
	420	89.1365	144.389	151.309
	424	89.1365	145.923	152.08
	428	90.5923	145.923	152.08
	432	89.1365	145.923	152.853
	436	89.8642	144.389	152.853
	440	88.4093	144.389	149.767
	444	88.4093	145.156	148.997
	448	87.6827	142.092	150.538
	452	86.9565	145.156	149.767
	456	89.1365	145.923	150.538
	460	87.6827	145.156	152.08
	464	88.4093	145.923	152.853
	468	88.4093	146.691	149.767
	472	88.4093	141.328	148.228
	476	86.9565	144.389	149.767
	480	86.9565	142.857	151.309
	484	86.2309	144.389	149.767
	488	85.5057	145.156	151.309
	492	88.4093	142.857	150.538
	496	86.9565	143.623	149.767
	500	84.7811	142.857	151.309
	504	86.2309	143.623	150.538
	508	88.4093	145.156	151.309
	512	87.6827	142.092	148.997
	516	86.2309	144.389	149.767
	520	85.5057	143.623	149.767
	524	86.2309	144.389	151.309
	528	85.5057	143.623	150.538
	532	85.5057	142.857	150.538
	536	86.2309	142.092	149.767
	540	85.5057	142.857	151.309
	544	86.2309	144.389	150.538
	548	86.2309	144.389	151.309
	552	86.2309	142.857	149.767
	556	85.5057	142.857	152.08
	560	85.5057	142.857	152.08
	564	86.2309	142.857	149.767
	568	86.2309	142.092	151.309
	572	86.2309	142.857	150.538
	576	86.9565	142.092	152.08
	580	83.3333	141.328	151.309
	584	85.5057	142.092	149.767
	588	86.2309	142.857	149.767
	592	86.9565	142.092	150.538
	596	84.7811	142.857	150.538
	600	86.2309	142.857	148.997
	604	84.7811	142.092	149.767
	608	84.7811	139.8	151.309
	612	82.6102	142.857	152.08
	616	84.057	142.857	149.767
	620	84.057	139.8	151.309
	624	85.5057	142.092	151.309
	628	85.5057	141.328	149.767
	632	84.7811	142.092	151.309
	636	85.5057	141.328	152.853
	640	84.057	141.328	149.767
	644	82.6102	141.328	149.767
	648	86.2309	142.857	150.538
	652	84.057	141.328	150.538
	656	84.7811	142.092	148.997
	660	84.057	140.564	150.538
	664	81.8876	142.092	149.767
	668	84.057	140.564	149.767
	672	81.8876	140.564	148.997
	676	83.3333	139.8	150.538
	680	82.6102	141.328	148.997
	684	80.4438	141.328	151.309
	688	84.057	139.8	151.309
	692	83.3333	140.564	148.997
	696	82.6102	139.8	150.538
	700	81.8876	140.564	151.309
	704	81.8876	139.8	149.767
	708	81.8876	141.328	150.538
	712	81.1655	140.564	153.625
	716	81.1655	139.037	150.538
	720	81.1655	139.8	150.538
	724	84.7811	141.328	150.538
	728	82.6102	142.092	150.538
	732	80.4438	139.8	149.767
	736	82.6102	139.037	150.538
	740	81.8876	139.8	151.309
	744	80.4438	139.8	151.309
	748	81.1655	139.8	152.08
	752	82.6102	138.275	150.538
	756	80.4438	142.092	149.767
	760	80.4438	140.564	149.767
	764	80.4438	141.328	151.309
	768	81.1655	139.8	152.08
	772	80.4438	139.037	149.767
	776	79.7227	142.092	150.538
	780	79.7227	139.8	150.538
	784	81.1655	139.8	151.309
	788	81.8876	140.564	149.767
	792	79.7227	139.8	152.08
	796	80.4438	139.8	150.538
	800	79.7227	139.037	150.538
	804	79.7227	140.564	151.309
	808	78.282	139.8	151.309
	812	80.4438	138.275	151.309
	816	80.4438	139.037	152.08
	820	80.4438	139.8	151.309
	824	81.8876	135.991	149.767
	828	81.8876	139.037	152.08
	832	80.4438	139.8	152.08
	836	81.1655	139.8	150.538
	840	80.4438	139.8	152.08
	844	80.4438	138.275	150.538
	848	81.1655	139.8	150.538
	852	81.1655	138.275	150.538
	856	80.4438	136.752	152.08
	860	80.4438	136.752	150.538
	864	81.8876	138.275	149.767
	868	80.4438	138.275	149.767
	872	79.0021	138.275	150.538
	876	78.282	137.513	152.853
	880	79.7227	139.037	149.767
	884	80.4438	139.037	151.309
	888	80.4438	139.037	152.08
	892	81.1655	137.513	151.309
	896	79.0021	137.513	149.767
	900	80.4438	138.275	150.538
	904	79.7227	137.513	152.853
	908	78.282	138.275	149.767
	912	79.7227	137.513	150.538
	916	79.7227	139.8	150.538
	920	80.4438	138.275	148.997
	924	78.282	136.752	149.767
	928	79.0021	138.275	150.538
	932	78.282	136.752	148.997
	936	78.282	140.564	150.538
	940	78.282	139.037	150.538
	944	76.8432	137.513	149.767
	948	79.7227	136.752	150.538
	952	78.282	139.037	148.997
	956	79.7227	137.513	152.08
	960	79.7227	136.752	151.309
	964	79.7227	137.513	148.228
	968	78.282	136.752	151.309
	972	78.282	136.752	151.309
	976	78.282	137.513	152.08
	980	78.282	135.991	149.767
	984	77.5623	138.275	151.309
	988	79.0021	137.513	151.309
	992	76.8432	136.752	150.538
	996	78.282	135.991	150.538
	1000	78.282	135.231	150.538
	1004	79.7227	136.752	150.538
	1008	79.7227	137.513	151.309
	1012	78.282	138.275	152.08
	1016	79.0021	136.752	151.309
	1020	79.7227	136.752	152.08
	1024	77.5623	135.991	148.997
	1028	78.282	135.231	149.767
	1032	78.282	135.231	150.538
	1036	79.0021	136.752	151.309
	1040	79.7227	134.472	150.538
	1044	79.0021	134.472	150.538
	1048	77.5623	135.231	150.538
	1052	79.7227	135.231	151.309
	1056	78.282	135.991	150.538
	1060	76.8432	135.991	149.767
	1064	77.5623	134.472	152.853
	1068	76.8432	135.991	152.853
	1072	76.8432	133.713	151.309
	1076	76.8432	135.231	149.767
	1080	76.1246	135.991	150.538
	1084	77.5623	135.991	152.08
	1088	76.8432	135.991	149.767
	1092	77.5623	136.752	152.08
	1096	77.5623	135.991	151.309
	1100	76.1246	135.991	150.538
	1104	78.282	135.231	149.767
	1108	77.5623	135.231	151.309
	1112	78.282	137.513	151.309
	1116	77.5623	135.991	151.309
	1120	77.5623	135.991	152.08
	1124	76.1246	135.991	149.767
	1128	75.4064	135.991	150.538
	1132	77.5623	133.713	151.309
	1136	76.8432	134.472	150.538
	1140	75.4064	135.231	150.538
	1144	76.8432	133.713	151.309
	1148	77.5623	134.472	149.767
	1152	76.8432	133.713	149.767
	1156	76.8432	135.231	152.08
	1160	74.6888	133.713	152.08
	1164	76.8432	134.472	150.538
	1168	77.5623	134.472	150.538
	1172	76.8432	135.231	148.997
	1176	77.5623	133.713	150.538
	1180	78.282	132.196	151.309
	1184	76.1246	132.954	150.538
	1188	76.8432	134.472	151.309
	1192	76.8432	134.472	150.538
	1196	77.5623	133.713	149.767
	1200	76.8432	134.472	148.228

## Sheet: Figure 4 Supplement 1
Normalized Fluorescent Anisotropy Measurements
Time (s)	Wild-type RP Average	Wild-type RP Standard Deviation	Rpn5-VTENKIF RP Average	Rpn5-VTENKIF RP Standard Deviation	Rpt4-EQ RP Average	Rpt4-EQ RP Standard Deviation	Rpt6-EQ RP Average	Rpt6-EQ Standard Deviation	Wild-type 1X 26S Average	Wild-type 1X 26S Average	Rpn5-VTENKIF 1X 26S Average	Rpn5-VTENKIF 1X 26S Standard Deviation	Rpt4-EQ 1X 26S Average	Rpt4-EQ 1X 26S Standard Deviation	Rpt6-EQ 1X 26S Average	Rpt6-EQ 1X 26S Standard Deviation	Wild-type 2X 26S Average	Wild-type 2X 26S Average	Rpn5-VTENKIF 2X 26S Average	Rpn5-VTENKIF 2X 26S Standard Deviation	Rpt4-EQ 2X 26S Average	Rpt4-EQ 2X 26S Standard Deviation	Rpt6-EQ 2X 26S Average	Rpt6-EQ 2X 26S Standard Deviation	Substrate Average	Substrate Standard Deviation	Core Only Average	Core Only Standard Deviation
0	0.903946	0.001433	0.894747	0.0159768	0.847172	0.0186787	0.819407	0.0783279	0.978387	0.00314719	0.904151	0.0190027	0.882128	0.000802732	0.908266	0.0277713	0.979286	0.0138389	0.912505	0.00469156	0.896027	0.0109381	0.932939	0.0114348	0.864495	0.0253445	0.915086	0.00174025
5	0.885747	0.0165691	0.873891	0.0144261	0.852683	0.0161157	0.842819	0.0612963	0.979524	0.0177339	0.884865	0.00536896	0.858544	0.0171352	0.900084	0.0178813	0.980849	0.00782595	0.896835	0.00899111	0.901589	0.00509595	0.925677	0.0298621	0.854616	0.0307585	0.903942	0.0111192
10	0.893701	0.0182359	0.884504	0.015551	0.843373	0.00853862	0.848538	0.0653759	0.957693	0.00415023	0.871739	0.00692659	0.86682	0.0187038	0.841283	0.0254362	0.952043	0.00570411	0.894257	0.0182433	0.889384	0.0130077	0.886532	0.0104822	0.846328	0.0297231	0.894447	0.00679383
15	0.886651	0.00897112	0.869474	0.015476	0.857144	0.0153595	0.841304	0.0564236	0.892667	0.00999274	0.874317	0.00688555	0.857765	0.00870346	0.801117	0.0249893	0.905741	0.0176603	0.896222	0.0190568	0.892024	0.0138249	0.841693	0.0077561	0.846141	0.0271223	0.888357	0.00443152
20	0.86408	0.0154755	0.874443	0.0141424	0.852661	0.0105083	0.842211	0.0591915	0.822996	0.011875	0.867141	0.0125664	0.862279	0.0033312	0.735297	0.0222118	0.842071	0.022041	0.87914	0.0284475	0.895643	0.0188385	0.796206	0.0133716	0.853771	0.0207481	0.881682	0.00880122
25	0.878659	0.00952134	0.870489	0.00621731	0.85368	0.0247424	0.8434	0.056628	0.748849	0.00932306	0.862556	0.0121268	0.865862	0.00474758	0.682633	0.0274015	0.768635	0.0320257	0.887373	0.00699546	0.902988	0.0205984	0.751138	0.0144255	0.850862	0.0231381	0.880814	0.00395305
30	0.877248	0.00326015	0.860951	0.0148848	0.854066	0.0113422	0.853583	0.0565498	0.687905	0.0129889	0.850466	0.0108694	0.860202	0.00325363	0.63885	0.0245878	0.707085	0.0300146	0.857044	0.0231064	0.900449	0.0120376	0.718019	0.0154086	0.853963	0.0285861	0.879493	0.00682606
35	0.884178	0.00892667	0.86606	0.0126122	0.851444	0.00824985	0.842719	0.0434727	0.621599	0.00971856	0.839166	0.0169602	0.858284	0.00740269	0.591861	0.0241197	0.630895	0.0286527	0.867778	0.0114329	0.904985	0.00631501	0.680158	0.0215631	0.846663	0.0231935	0.875783	0.00643417
40	0.876648	0.013947	0.862166	0.00486936	0.843541	0.0199921	0.839865	0.0535937	0.567352	0.0103463	0.836349	0.0130653	0.858698	0.0155526	0.570626	0.0204868	0.595819	0.028167	0.849787	0.00836761	0.910871	0.00507406	0.64581	0.0271749	0.847367	0.0235637	0.872972	0.00551739
45	0.88587	0.0192378	0.869891	0.00533851	0.845047	0.0112231	0.845407	0.0391427	0.526244	0.012798	0.816332	0.00860564	0.857788	0.011422	0.524833	0.0217377	0.546471	0.0302346	0.838317	0.039248	0.894144	0.0113684	0.616719	0.0357741	0.849664	0.0242272	0.867356	0.00279906
50	0.884825	0.0192407	0.859179	0.0153007	0.840415	0.00870773	0.846956	0.0498638	0.485455	0.0145131	0.807354	0.0123252	0.854463	0.00805287	0.495918	0.015024	0.509924	0.0302792	0.832312	0.0236186	0.894618	0.00856362	0.588625	0.0426095	0.849688	0.0195699	0.86702	0.0130213
55	0.874289	0.0113904	0.862673	0.00829687	0.844066	0.00562318	0.843332	0.0568846	0.455101	0.00751416	0.797151	0.0041261	0.864128	0.0172227	0.464955	0.013927	0.473628	0.0299683	0.812303	0.0138624	0.892245	0.00498533	0.563272	0.0390261	0.851993	0.0287067	0.864325	0.00899532
60	0.880986	0.0161282	0.858076	0.00808026	0.857622	0.0144794	0.833625	0.0472208	0.412581	0.00128326	0.785863	0.0133144	0.850042	0.00437445	0.44396	0.0240605	0.44227	0.033545	0.810262	0.0200017	0.888173	0.0150333	0.538963	0.0370006	0.845759	0.022141	0.868731	0.0170106
65	0.880857	0.0240332	0.864771	0.00395902	0.854078	0.00983007	0.832005	0.0359609	0.398579	0.00872026	0.769942	0.00319193	0.844312	0.0110248	0.424915	0.0126049	0.417762	0.0233468	0.803222	0.0182769	0.89878	0.00693532	0.523205	0.0448855	0.849328	0.0248126	0.853065	0.0167769
70	0.881469	0.0118368	0.864319	0.00639186	0.842392	0.0109161	0.842836	0.0317374	0.373305	0.00957948	0.761082	0.00167909	0.859267	0.0145747	0.404636	0.0173265	0.396536	0.0232268	0.79477	0.0252207	0.892854	0.0120938	0.502272	0.0381674	0.850211	0.0232922	0.854519	0.00576095
75	0.870859	0.00888476	0.863572	0.00432973	0.852155	0.0187253	0.849282	0.0456593	0.3497	0.00558334	0.757584	0.0142296	0.851898	0.00508439	0.399709	0.0159318	0.374023	0.0307001	0.786754	0.00914898	0.906681	0.00230544	0.481209	0.0498105	0.847271	0.0241869	0.856279	0.00591803
80	0.881739	0.0163916	0.862828	0.00901258	0.849946	0.00538274	0.848153	0.0437016	0.327278	0.00818403	0.736157	0.00428823	0.859652	0.00783451	0.372497	0.0184395	0.349111	0.0300179	0.780035	0.0181983	0.892213	0.0109251	0.469825	0.0458339	0.845208	0.027049	0.849116	0.00136368
85	0.880631	0.0179233	0.873929	0.00101953	0.843594	0.00492304	0.841842	0.0487811	0.318832	0.00414824	0.727191	0.0199736	0.855265	0.0189795	0.353541	0.0174093	0.342479	0.0338228	0.758747	0.0161618	0.889406	0.00148205	0.456966	0.0425403	0.846806	0.0276722	0.855709	0.00741493
90	0.883617	0.0112471	0.866421	0.0114162	0.859964	0.0118255	0.845414	0.0421086	0.304506	0.0122123	0.722135	0.00926801	0.851502	0.0141387	0.348388	0.0102548	0.326258	0.0259361	0.756638	0.0113386	0.891712	0.0110286	0.442691	0.0421754	0.844262	0.0235385	0.84475	0.0147722
95	0.896532	0.0170178	0.863046	0.0092943	0.855218	0.0224401	0.83723	0.0411345	0.29249	0.00402967	0.719195	0.0166419	0.843691	0.0204139	0.323868	0.0227617	0.314283	0.0188547	0.7447	0.0291807	0.889933	0.00419441	0.427134	0.0422248	0.843348	0.029385	0.84819	0.00428091
100	0.886077	0.00929023	0.862879	0.013144	0.85866	0.0133174	0.842661	0.03436	0.277264	0.00573027	0.695165	0.0113494	0.856755	0.00761095	0.322534	0.0259158	0.301394	0.0227962	0.73065	0.00902243	0.877824	0.0134419	0.419797	0.0560139	0.847255	0.0266321	0.845671	0.00859178
105	0.871251	0.0163672	0.859922	0.0141482	0.85568	0.0218898	0.854063	0.0545362	0.268222	0.0124062	0.685671	0.0157021	0.861403	0.0167154	0.317507	0.0208129	0.289553	0.0210291	0.732226	0.0211037	0.886524	0.00694798	0.420985	0.0349208	0.849711	0.0251882	0.839627	0.0131307
110	0.887232	0.00827443	0.851775	0.012079	0.853844	0.0125831	0.825913	0.0412199	0.262085	0.00187788	0.676142	0.00479946	0.852579	0.0111081	0.307231	0.0141574	0.288278	0.0188141	0.729445	0.010514	0.887861	0.00412034	0.390029	0.0288776	0.848549	0.0250305	0.836939	0.00255999
115	0.889818	0.0195525	0.862733	0.0190364	0.859468	0.0121452	0.84555	0.0381917	0.249381	0.0081553	0.673309	0.0171637	0.847936	0.0119205	0.298513	0.00281707	0.27595	0.019706	0.708127	0.0101754	0.895085	0.0155848	0.387327	0.0368732	0.851157	0.0275593	0.84023	0.00696643
120	0.888813	0.0160622	0.864824	0.0129284	0.855705	0.015256	0.832749	0.0373848	0.239585	0.00416468	0.666943	0.0140526	0.845003	0.00549514	0.301742	0.00710779	0.264205	0.0208476	0.699539	0.00248139	0.894993	0.0168077	0.373512	0.0352131	0.850984	0.0345768	0.835604	0.0179001
125	0.879321	0.0172379	0.856629	0.0052847	0.846731	0.0185441	0.836747	0.0362589	0.232437	0.00235278	0.659828	0.0104054	0.835998	0.0147977	0.276403	0.0169531	0.263554	0.0131657	0.69701	0.0163193	0.887956	0.00937479	0.371402	0.037338	0.842404	0.0274765	0.830687	0.00682924
130	0.883192	0.00675179	0.8717	0.00841202	0.852832	0.00926687	0.843182	0.0364276	0.221732	0.00257895	0.636085	0.00725236	0.844612	0.00879993	0.271308	0.0163922	0.253661	0.0144583	0.68191	0.0164439	0.890192	0.0024612	0.354298	0.0446028	0.850106	0.0287299	0.830748	0.0103609
135	0.873309	0.0108498	0.85997	0.00864917	0.846955	0.0191469	0.832107	0.0369506	0.218812	0.00812819	0.624852	0.0097512	0.855932	0.0143874	0.271227	0.0277441	0.249143	0.0119751	0.684566	0.0153721	0.880453	0.00942021	0.358157	0.0369296	0.849164	0.0252928	0.832212	0.0109296
140	0.87046	0.0106086	0.860232	0.0111133	0.855486	0.0182704	0.830279	0.0309943	0.214559	0.00192482	0.627754	0.00745108	0.846961	0.0138188	0.261267	0.0102381	0.243221	0.0153078	0.673592	0.0188697	0.891479	0.00682502	0.348345	0.0439941	0.844987	0.0283702	0.828466	0.00642125
145	0.885259	0.0138562	0.867043	0.00958168	0.85649	0.0144275	0.842265	0.0462249	0.211529	0.0077991	0.620284	0.0104064	0.841199	0.0121252	0.249553	0.00799747	0.235641	0.0201119	0.669569	0.0121028	0.898512	0.0218075	0.338177	0.0480676	0.841888	0.030312	0.81686	0.00559111
150	0.876896	0.0123381	0.868501	0.00841955	0.841254	0.0280594	0.826036	0.0574223	0.203077	0.0048815	0.621874	0.00920061	0.836332	0.00688289	0.24364	0.0141117	0.229126	0.0182945	0.660567	0.00577342	0.891023	0.015451	0.328621	0.035239	0.842857	0.0269956	0.821404	0.0022104
155	0.885696	0.00798857	0.861597	0.0114595	0.853379	0.0112127	0.840387	0.0314932	0.202332	0.0126432	0.600374	0.0146848	0.833565	0.0227236	0.243522	0.0181347	0.233148	0.0128873	0.657138	0.0209007	0.879877	0.00321014	0.32799	0.0501812	0.839072	0.0248327	0.823585	0.0114541
160	0.888045	0.00982044	0.86367	0.00992254	0.858767	0.0107388	0.836975	0.0337322	0.198778	0.0133036	0.597201	0.0056187	0.831671	0.0192091	0.243795	0.0115006	0.221327	0.0205157	0.649472	0.0198421	0.883272	0.010042	0.324704	0.0413944	0.848507	0.0276745	0.804666	0.0132237
165	0.890487	0.005686	0.86278	0.00811152	0.850745	0.00979573	0.845471	0.0484206	0.192399	0.00554948	0.580731	0.0116833	0.837054	0.0168305	0.236921	0.0139244	0.22141	0.0229343	0.653145	0.0200495	0.882991	0.00957063	0.31951	0.0404906	0.843681	0.0300305	0.811689	0.00510044
170	0.888551	0.0120931	0.870788	0.00967051	0.852836	0.0168399	0.835066	0.0477113	0.191383	0.00987743	0.578888	0.0130381	0.837317	0.0142573	0.217546	0.0207203	0.220836	0.0147409	0.64402	0.0141416	0.897534	0.0119732	0.30574	0.035178	0.847078	0.0322507	0.815882	0.0109145
175	0.879842	0.0188093	0.866566	0.00522609	0.86016	0.00730551	0.839995	0.0554405	0.182115	0.0145876	0.570989	0.0116262	0.834264	0.0203899	0.223421	0.0124873	0.205357	0.025244	0.63655	0.0114389	0.886228	0.0201116	0.303454	0.0322382	0.840725	0.0270864	0.809525	0.0134154
180	0.887885	0.00944396	0.862074	0.00762805	0.849193	0.0095284	0.847577	0.0575274	0.186816	0.0065857	0.575759	0.00683028	0.838342	0.0144293	0.221022	0.00578878	0.219447	0.0225558	0.624725	0.0183715	0.879702	0.0115807	0.295633	0.0347785	0.847223	0.0297058	0.806062	0.00503031
185	0.885757	0.00704264	0.856271	0.0127279	0.850645	0.00599804	0.832169	0.0485022	0.175938	0.00392483	0.568859	0.00832369	0.821464	0.0074413	0.210613	0.0118861	0.205738	0.016423	0.620758	0.0157973	0.876139	0.0211229	0.297007	0.0409723	0.841758	0.0291569	0.805529	0.00753592
190	0.878992	0.0188743	0.850677	0.0062726	0.857806	0.00644723	0.836526	0.036869	0.177815	0.00597452	0.560449	0.00763102	0.82069	0.0130816	0.219488	0.0156644	0.203327	0.0130576	0.615525	0.0192084	0.87354	0.00535746	0.291072	0.0362939	0.844669	0.03041	0.802447	0.00404745
195	0.887489	0.0202904	0.869131	0.0113737	0.859469	0.00980681	0.833787	0.0397179	0.17464	0.00416576	0.54387	0.00341221	0.833222	0.0178861	0.206508	0.0177915	0.199167	0.0125928	0.611308	0.0145235	0.876746	0.0130183	0.285937	0.0295104	0.848082	0.0342092	0.79889	0.00377029
200	0.895585	0.0201174	0.86321	0.0119235	0.857394	0.018252	0.829772	0.0484382	0.161753	0.0110368	0.540484	0.00805531	0.831472	0.0159142	0.210808	0.00789408	0.19042	0.0164946	0.60827	0.00546761	0.874993	0.00145363	0.279619	0.0345666	0.845366	0.0336063	0.791795	0.0124473
205	0.882249	0.0117892	0.865436	0.00195147	0.857854	0.0153278	0.82719	0.0379246	0.171147	0.0110954	0.538248	0.0228814	0.824563	0.0107313	0.20243	0.015522	0.196782	0.0160494	0.590678	0.0155015	0.870993	0.0088173	0.285004	0.0290481	0.848075	0.029306	0.798489	0.00769332
210	0.874915	0.00832424	0.855744	0.00514209	0.85029	0.0204777	0.84207	0.0491473	0.16669	0.00546447	0.531637	0.0189573	0.833472	0.015221	0.194436	0.0102347	0.198019	0.0105951	0.595571	0.0262217	0.876758	0.0164101	0.282288	0.0380191	0.838654	0.0300061	0.79718	0.00269526
215	0.874872	0.00959658	0.865915	0.00785621	0.855475	0.0148136	0.843755	0.0385934	0.163577	0.00945066	0.535083	0.0116514	0.829654	0.0202826	0.194735	0.0110156	0.185013	0.0142178	0.589058	0.00759874	0.880814	0.0108707	0.272744	0.0360088	0.844569	0.0283425	0.789527	0.0160452
220	0.875336	0.00960901	0.866871	0.00590073	0.861259	0.0143521	0.830249	0.0421991	0.168429	0.00628981	0.514294	0.0137833	0.829728	0.0220896	0.192657	0.00843277	0.185129	0.0134317	0.583167	0.00527421	0.874956	0.0161789	0.268032	0.0268837	0.847198	0.0274523	0.786821	0.00563834
225	0.875656	0.0156278	0.864871	0.012721	0.844727	0.0177925	0.833605	0.0309128	0.150847	0.00576922	0.513006	0.0141157	0.822654	0.0149228	0.188264	0.0186132	0.181701	0.0128843	0.555813	0.010286	0.879938	0.0119989	0.26353	0.0276711	0.843429	0.0331566	0.788018	0.0140849
230	0.878191	0.00646543	0.863094	0.00272891	0.846472	0.00922674	0.838579	0.042926	0.160593	0.0180059	0.511979	0.016199	0.822601	0.0297855	0.178743	0.00483987	0.183323	0.0162301	0.569335	0.0209208	0.880171	0.0103648	0.255124	0.0291798	0.837094	0.0338948	0.77533	0.0121775
235	0.87482	0.0140712	0.851961	0.0114257	0.846637	0.0122524	0.826677	0.0387837	0.156536	0.0146934	0.498633	0.0122567	0.823601	0.00267376	0.188754	0.0147281	0.181896	0.0190984	0.569734	0.0167265	0.861041	0.00812646	0.25877	0.0309788	0.837789	0.0350102	0.77421	0.0163298
240	0.884011	0.0135001	0.847996	0.00733349	0.85591	0.0170954	0.835604	0.0450562	0.152248	0.0139311	0.499325	0.019085	0.831876	0.0177759	0.179066	0.00996048	0.18099	0.0150301	0.553568	0.0192289	0.868623	0.015257	0.253431	0.030845	0.842025	0.0359787	0.77511	0.0174595
245	0.879887	0.021768	0.848861	0.0101251	0.856318	0.0184003	0.828162	0.0393211	0.148091	0.00199222	0.492549	0.0114708	0.811813	0.018148	0.182243	0.016778	0.177734	0.00807814	0.557802	0.0143542	0.857764	0.018944	0.257686	0.0378912	0.839915	0.0396151	0.776796	0.0154578
250	0.884036	0.0139798	0.855425	0.0064452	0.850094	0.010711	0.828816	0.0373353	0.146889	0.00920859	0.481006	0.00826858	0.815454	0.0116799	0.178111	0.0164089	0.17141	0.00692519	0.559097	0.0133964	0.871876	0.0217955	0.241147	0.0230831	0.84629	0.0340099	0.77597	0.00848217
255	0.885656	0.0169105	0.852326	0.00483515	0.848069	0.00975492	0.819357	0.0418359	0.148932	0.0153079	0.477097	0.0262796	0.815946	0.0135116	0.164793	0.0182226	0.179088	0.012725	0.548649	0.0214426	0.876217	0.0252065	0.244583	0.0267112	0.847759	0.017389	0.77446	0.00652129
260	0.884639	0.0150412	0.852275	0.00681654	0.855406	0.0151513	0.82155	0.0492895	0.146345	0.00918242	0.482073	0.011018	0.824186	0.0234661	0.165045	0.00549788	0.166568	0.0136086	0.540878	0.0172581	0.859928	0.012978	0.245709	0.015835	0.841735	0.0188671	0.772664	0.0124776
265	0.884852	0.013388	0.847655	0.00930974	0.860456	0.0246805	0.829794	0.0463173	0.146179	0.0115797	0.463338	0.0173459	0.82031	0.0119245	0.172587	0.00682081	0.173171	0.0190381	0.53656	0.0105181	0.863827	0.0100225	0.240749	0.0388059	0.847346	0.0113028	0.768852	0.0115207
270	0.879657	0.0127323	0.863837	0.0057115	0.849716	0.0116534	0.822939	0.0377569	0.133973	0.00877212	0.471063	0.013866	0.81237	0.017241	0.170088	0.0113423	0.170542	0.0102882	0.543023	0.0122484	0.866079	0.00700973	0.230386	0.0126095	0.850172	0.0172803	0.763342	0.0139222
275	0.878252	0.014089	0.85515	0.00639606	0.859353	0.0224408	0.839851	0.0543673	0.140508	0.00747983	0.458377	0.0193638	0.806021	0.0105327	0.156371	0.0184395	0.168682	0.0126789	0.534162	0.00229186	0.866987	0.0119293	0.230201	0.0141805	0.85213	0.0215345	0.759399	0.0147839
280	0.879436	0.0126829	0.85585	0.0133962	0.845437	0.00123109	0.824472	0.0410684	0.134944	0.011576	0.459141	0.0100244	0.805495	0.0199242	0.162031	0.0165972	0.161208	0.018719	0.526762	0.0246333	0.857836	0.0158436	0.229986	0.0226191	0.845394	0.017077	0.760228	0.014042
285	0.873459	0.0121347	0.85583	0.010176	0.855403	0.0112621	0.821866	0.0390789	0.133254	0.00713919	0.454966	0.0158182	0.816632	0.0137034	0.159631	0.0168463	0.160203	0.0196947	0.522351	0.0142472	0.86931	0.013454	0.226095	0.026176	0.851677	0.0156439	0.758463	0.006945
290	0.882876	0.0134957	0.856272	0.00520976	0.858858	0.0116449	0.833297	0.0387763	0.137586	0.00524157	0.450564	0.0123566	0.799831	0.0196058	0.157766	0.00738328	0.165232	0.00503633	0.519917	0.016519	0.856702	0.0118474	0.224354	0.0157354	0.849728	0.0178337	0.754468	0.0116793
295	0.873055	0.00810097	0.853236	0.00570719	0.849707	0.012505	0.831385	0.0524494	0.132004	0.0128193	0.43789	0.0198721	0.80866	0.00725718	0.15898	0.00488372	0.157482	0.0084283	0.510096	0.0172353	0.862023	0.00454215	0.225997	0.0171104	0.845276	0.013202	0.752434	0.00723882
300	0.878092	0.019702	0.846114	0.0106278	0.85315	0.0246757	0.826501	0.0520997	0.13528	0.0176748	0.440208	0.0179252	0.80721	0.0129999	0.153223	0.0134261	0.155421	0.0170014	0.510142	0.00695291	0.862936	0.0121466	0.21469	0.027191	0.844472	0.0151652	0.749475	0.0082905
305	0.871539	0.0127102	0.85515	0.00553684	0.851472	0.00975424	0.818151	0.0428851	0.133966	0.00965308	0.432732	0.0120604	0.811814	0.0122125	0.145189	0.0096504	0.158252	0.00705782	0.51749	0.0222924	0.86276	0.00540742	0.21629	0.0182079	0.846683	0.0168979	0.743508	0.0102812
310	0.879212	0.0198919	0.862591	0.0146687	0.85976	0.0140337	0.823756	0.0446129	0.127847	0.00725809	0.430384	0.0209722	0.804856	0.0276427	0.150105	0.0143474	0.153282	0.00761084	0.495516	0.0142865	0.857468	0.0204056	0.224291	0.0157846	0.84502	0.0172716	0.7552	0.0103357
315	0.884734	0.0169092	0.850315	0.0183119	0.862677	0.00429333	0.819793	0.0490365	0.124234	0.00413245	0.433579	0.0121369	0.799283	0.0131002	0.143705	0.00962959	0.16447	0.0166781	0.498161	0.0154285	0.869162	0.0149972	0.206923	0.0211148	0.846465	0.019114	0.747367	0.0151639
320	0.879552	0.0176472	0.852824	0.00315827	0.857962	0.021901	0.815393	0.0440978	0.119127	0.00954563	0.422659	0.0146112	0.797622	0.0153962	0.157182	0.0148366	0.154629	0.0085459	0.500252	0.0202602	0.858653	0.0117158	0.207015	0.0282767	0.846199	0.012521	0.741172	0.012365
325	0.887153	0.0116905	0.846747	0.00287772	0.852473	0.00983274	0.835351	0.0352539	0.118363	0.00936903	0.420565	0.0240264	0.799004	0.0170734	0.146099	0.00670683	0.143778	0.0133661	0.494832	0.0173434	0.860703	0.00989013	0.213297	0.0219717	0.850806	0.0102727	0.735252	0.00608691
330	0.880777	0.0131188	0.852476	0.003645	0.858516	0.0113877	0.821545	0.0353133	0.119837	0.00414744	0.41668	0.00697083	0.800231	0.00939092	0.136021	0.00325675	0.156529	0.0185244	0.49536	0.01701	0.861801	0.0085628	0.208738	0.0263883	0.842238	0.0183494	0.735312	0.0112981
335	0.882313	0.0129014	0.853363	0.00371816	0.850267	0.0104251	0.827566	0.0364729	0.126748	0.0104669	0.40747	0.026875	0.791924	0.0214505	0.141988	0.0182845	0.151528	0.0171126	0.492412	0.014513	0.858262	0.0063579	0.205818	0.0238042	0.842494	0.0197956	0.733593	0.00714772
340	0.886822	0.0272718	0.84866	0.00505042	0.851737	0.00371853	0.816185	0.0293697	0.116453	0.00674658	0.419786	0.00998518	0.792834	0.0106082	0.147291	0.0164319	0.151483	0.013243	0.483325	0.0107699	0.863224	0.0165333	0.214434	0.0275486	0.844144	0.0168496	0.740529	0.0120928
345	0.873525	0.0133964	0.85064	0.012846	0.85201	0.0218245	0.82828	0.0383281	0.113776	0.0145643	0.39465	0.0283623	0.796706	0.00978559	0.13202	0.016485	0.153214	0.0179473	0.480651	0.0200306	0.851378	0.00326111	0.198824	0.0251368	0.843659	0.020401	0.73038	0.00736325
350	0.877241	0.0127299	0.851582	0.0147116	0.845699	0.00855027	0.818907	0.0311189	0.118264	0.0118369	0.399823	0.0143061	0.791124	0.0152942	0.144431	0.0154033	0.145227	0.0128591	0.49022	0.0112603	0.85007	0.0117635	0.207218	0.0261736	0.841469	0.0202068	0.731944	0.0208039
355	0.879015	0.0176945	0.856312	0.00879248	0.854197	0.0200434	0.823904	0.0420837	0.120525	0.006078	0.401938	0.0127329	0.802599	0.0159664	0.137528	0.013267	0.148715	0.0187809	0.485945	0.0223577	0.848818	0.0106193	0.205479	0.0211611	0.846356	0.0169739	0.725154	0.0105655
360	0.887479	0.0123007	0.849576	0.00726671	0.845289	0.00634079	0.820268	0.0289948	0.116518	0.0132748	0.400284	0.0118176	0.789004	0.0261337	0.132697	0.014463	0.143352	0.004273	0.47315	0.0163363	0.841102	0.0112493	0.188626	0.024589	0.845627	0.0202426	0.724283	0.0134505
365	0.864141	0.0168581	0.855127	0.0100647	0.855534	0.0197733	0.834956	0.0249551	0.108584	0.0100311	0.386596	0.0182589	0.790921	0.0201762	0.142103	0.006862	0.139737	0.0167997	0.483476	0.011892	0.854563	0.0137662	0.190518	0.0157944	0.847214	0.0214141	0.730914	0.0155978
370	0.868321	0.0250487	0.854023	0.0201849	0.857494	0.0141739	0.824327	0.0287373	0.11003	0.00931822	0.386711	0.0304978	0.789276	0.0178148	0.136115	0.00430211	0.14362	0.0222597	0.464474	0.0137727	0.847259	0.0131071	0.192336	0.0330844	0.837669	0.0172887	0.7189	0.0128521
375	0.87197	0.011671	0.852701	0.0077113	0.850587	0.0154819	0.819074	0.0286198	0.11519	0.0183632	0.385417	0.0235002	0.787376	0.0205032	0.134834	0.0171343	0.139555	0.0102989	0.46135	0.0112942	0.845576	0.0126383	0.193938	0.0184232	0.846727	0.0262207	0.712245	0.00973354
380	0.871973	0.0160344	0.857246	0.0233955	0.855823	0.00560826	0.824419	0.0345389	0.117293	0.0121796	0.380586	0.0212499	0.786108	0.0209547	0.133779	0.00336308	0.133715	0.0186637	0.457694	0.0170805	0.847553	0.00436899	0.191769	0.037175	0.837511	0.0262381	0.711225	0.0018782
385	0.869426	0.0206039	0.847425	0.00818671	0.846208	0.00488963	0.822352	0.0260606	0.11541	0.0129676	0.382492	0.0195477	0.7887	0.0188464	0.12824	0.0141779	0.145696	0.00631992	0.452395	0.0117217	0.858325	0.0160198	0.195455	0.0230474	0.84825	0.0127515	0.719376	0.0119579
390	0.878407	0.00951859	0.855307	0.00808171	0.851896	0.00864773	0.822493	0.0271179	0.10986	0.0175292	0.372296	0.0158738	0.786132	0.0136381	0.126662	0.00881671	0.138637	0.0160606	0.451859	0.0117301	0.846784	0.0202231	0.195364	0.0249472	0.848031	0.0098981	0.707637	0.0122077
395	0.876	0.0080375	0.848003	0.00566998	0.856622	0.00608023	0.822671	0.0175406	0.106862	0.0159159	0.36795	0.0146147	0.78261	0.0269899	0.116531	0.011377	0.133997	0.0132902	0.448638	0.0209194	0.83998	0.0129032	0.187459	0.0214357	0.843153	0.0101974	0.715974	0.00950596
400	0.881924	0.0169777	0.843079	0.0104218	0.855289	0.0116497	0.828442	0.0258243	0.102828	0.00561881	0.369278	0.0167092	0.772123	0.0101169	0.121788	0.00953754	0.130833	0.0127752	0.442342	0.0192951	0.843887	0.00997629	0.187079	0.033379	0.851565	0.0110662	0.702964	0.0185157
405	0.867735	0.0190763	0.840235	0.00255081	0.850567	0.00431802	0.83146	0.0299966	0.10833	0.00563391	0.3634	0.022424	0.784973	0.0142935	0.12062	0.0154971	0.139585	0.00726749	0.448227	0.015796	0.842752	0.0114749	0.179039	0.022089	0.84849	0.0078592	0.704639	0.0104031
410	0.878363	0.0139654	0.831728	0.00978074	0.853168	0.022806	0.829928	0.0312893	0.100384	0.0160979	0.363985	0.015818	0.76793	0.0214027	0.128562	0.0137715	0.133206	0.00980536	0.437015	0.00841957	0.836847	0.0196188	0.186678	0.029853	0.842686	0.012308	0.696705	0.0102984
415	0.871008	0.0219199	0.84196	0.0133373	0.854606	0.021289	0.823513	0.03963	0.10237	0.0046518	0.357369	0.0176749	0.764053	0.0248075	0.127079	0.0114717	0.133039	0.0150124	0.438496	0.0202402	0.83674	0.00682846	0.180472	0.0185941	0.844277	0.0137283	0.693962	0.00508178
420	0.868951	0.00462962	0.839355	0.00998791	0.858892	0.0180651	0.825918	0.0306681	0.101002	0.00229378	0.357436	0.0162515	0.780811	0.02138	0.122106	0.0100081	0.136803	0.00610217	0.443486	0.0176439	0.825674	0.0329816	0.17833	0.017156	0.845434	0.0194279	0.695997	0.0101994
425	0.877777	0.0125549	0.851995	0.00816814	0.851468	0.0171063	0.828521	0.0211336	0.104424	0.0141	0.361626	0.0216132	0.781654	0.0222303	0.120891	0.00528194	0.128468	0.00988623	0.427255	0.0118911	0.841036	0.0160056	0.169432	0.0184278	0.844112	0.0118205	0.698919	0.00580118
430	0.873924	0.00845908	0.844873	0.0114921	0.854895	0.0162441	0.826252	0.0263382	0.101368	0.0102803	0.343369	0.0110153	0.765577	0.011752	0.114591	0.013707	0.130038	0.0195277	0.429426	0.0142777	0.841788	0.0226587	0.172131	0.0139342	0.846931	0.00974813	0.703569	0.0129231
435	0.872607	0.0107938	0.842625	0.0081108	0.852869	0.0124186	0.809446	0.0337159	0.10004	0.0116926	0.350941	0.0175324	0.767151	0.0209052	0.11454	0.0156337	0.127954	0.0193914	0.435052	0.0228731	0.834173	0.0274515	0.171405	0.012392	0.844581	0.0171508	0.693687	0.010783
440	0.884767	0.00772223	0.838596	0.014337	0.858497	0.0238622	0.815789	0.0446372	0.0993346	0.0173981	0.347713	0.0210945	0.765725	0.0220052	0.122371	0.00942546	0.127898	0.0111574	0.428516	0.0215263	0.841868	0.0140128	0.178057	0.0190875	0.854469	0.0122489	0.689491	0.00642754
445	0.872128	0.0218856	0.84938	0.00324384	0.851291	0.0210728	0.821641	0.022661	0.0970796	0.00151904	0.344172	0.0161755	0.769894	0.00696408	0.127884	0.00698473	0.127884	0.0191272	0.424892	0.0127612	0.819482	0.0265725	0.169823	0.0178175	0.849446	0.0150519	0.692897	0.0106769
450	0.880816	0.00951856	0.844966	0.0187185	0.848738	0.0123156	0.813233	0.0383634	0.0905818	0.0124696	0.341859	0.0165754	0.764666	0.0167136	0.122242	0.0119818	0.126626	0.0116379	0.423873	0.0289065	0.817709	0.0219057	0.176444	0.0299724	0.846644	0.0127992	0.693173	0.0121336
455	0.873456	0.0117253	0.850352	0.00559408	0.855516	0.00993543	0.824128	0.0413271	0.0976785	0.00503707	0.342603	0.0176011	0.755897	0.0106384	0.117482	0.0145103	0.125479	0.00689476	0.421455	0.0104089	0.838708	0.00372969	0.175411	0.0103966	0.846765	0.0130486	0.681975	0.0139645
460	0.869146	0.0221071	0.850455	0.0123343	0.84087	0.0176419	0.816388	0.0420586	0.0928451	0.00960715	0.32452	0.0160856	0.764692	0.018823	0.113479	0.021689	0.121993	0.0160176	0.423334	0.0236612	0.827038	0.0242542	0.167125	0.0179901	0.845135	0.0138048	0.690437	0.0162354
465	0.871991	0.014049	0.845283	0.0114217	0.850219	0.0102976	0.813343	0.0301065	0.0921089	0.0111686	0.33537	0.0121693	0.76234	0.0275375	0.116563	0.0126617	0.11878	0.00830009	0.416537	0.00897216	0.832198	0.0265791	0.164273	0.0183248	0.843431	0.0157822	0.683547	0.0147332
470	0.873266	0.0123394	0.836046	0.00519594	0.849435	0.0116332	0.813293	0.0308919	0.096137	0.00535092	0.325342	0.0133159	0.763199	0.01664	0.119801	0.0192202	0.126602	0.0174662	0.415993	0.00845243	0.826985	0.0188748	0.172264	0.0213445	0.842406	0.0165553	0.682494	0.0150672
475	0.871454	0.0147018	0.840828	0.0100825	0.85388	0.00922408	0.817533	0.0426431	0.0970093	0.0144741	0.328228	0.0191527	0.752966	0.0177319	0.114695	0.0141854	0.118769	0.0158119	0.407424	0.0102586	0.825312	0.0210128	0.173523	0.0244772	0.846832	0.0124454	0.683108	0.02099
480	0.87951	0.0167809	0.853612	0.00906624	0.850163	0.0116229	0.809187	0.0416007	0.093071	0.017365	0.326473	0.0140017	0.763921	0.0190769	0.111413	0.0110923	0.116317	0.0160897	0.400735	0.0162743	0.836207	0.0121433	0.161158	0.0200014	0.845895	0.0110989	0.678871	0.0181846
485	0.872634	0.0204506	0.844065	0.00127331	0.848128	0.0210217	0.806215	0.028221	0.0860437	0.0176032	0.315528	0.0142243	0.75354	0.0152904	0.105764	0.0104707	0.120528	0.00748334	0.401826	0.0130527	0.826432	0.0168995	0.17137	0.0237616	0.845617	0.0155595	0.66455	0.011022
490	0.882084	0.0138397	0.844623	0.0144603	0.853966	0.0112652	0.818038	0.0372189	0.0803481	0.0116368	0.31597	0.0149831	0.758252	0.0191889	0.100235	0.00794215	0.118996	0.00989918	0.401476	0.0119201	0.828507	0.025674	0.169149	0.0232097	0.846685	0.0128399	0.675169	0.00926828
495	0.874746	0.00875017	0.841611	0.0102777	0.863059	0.0200669	0.814818	0.0286982	0.0883065	0.00726805	0.316523	0.012451	0.756445	0.0163461	0.11542	0.0103229	0.118598	0.0142285	0.387992	0.00960272	0.829703	0.023168	0.167059	0.0164286	0.84457	0.0117914	0.678095	0.00717846
500	0.869155	0.0200756	0.835612	0.0111693	0.854374	0.0038275	0.813755	0.0271684	0.0834335	0.0188805	0.31338	0.0101475	0.752522	0.0181217	0.10368	0.0117681	0.116886	0.013459	0.401798	0.015774	0.814593	0.0232377	0.159544	0.0186324	0.841129	0.0131106	0.667512	0.0236143
505	0.874828	0.00751156	0.833975	0.00645792	0.85086	0.0205085	0.811837	0.0389113	0.0814203	0.00728982	0.305971	0.0181084	0.76434	0.0166642	0.112105	0.00995194	0.12794	0.0189778	0.396168	0.0176347	0.82478	0.0113259	0.162335	0.0222115	0.844277	0.0152435	0.674758	0.0111423
510	0.883503	0.0170545	0.836358	0.00475142	0.856934	0.030787	0.801245	0.0367012	0.0921547	0.00678929	0.31067	0.0197755	0.75917	0.0141847	0.0987831	0.0147775	0.115135	0.0172958	0.39429	0.0148461	0.818731	0.0138493	0.160795	0.00970676	0.844288	0.0144302	0.661285	0.0113434
515	0.874829	0.0133484	0.836806	0.0110343	0.85941	0.0184846	0.809203	0.03134	0.0848656	0.00979894	0.30916	0.0220914	0.754295	0.0304048	0.105003	0.0172387	0.116337	0.0225093	0.393195	0.0171554	0.825244	0.0173735	0.156629	0.0180376	0.84827	0.0102777	0.662362	0.0130855
520	0.872168	0.015221	0.840604	0.0102543	0.852994	0.00579288	0.80792	0.0303579	0.081145	0.00956902	0.303188	0.0163333	0.743022	0.0284061	0.0934181	0.0178803	0.118982	0.00488701	0.392212	0.008483	0.811238	0.0155198	0.161156	0.0197691	0.849951	0.0123624	0.669959	0.0156472
525	0.869912	0.00774728	0.839094	0.0214694	0.851374	0.0129841	0.793883	0.0342948	0.091811	0.00735881	0.304581	0.024733	0.747521	0.0134105	0.107018	0.0187477	0.110146	0.00395065	0.390936	0.0162882	0.818284	0.0173313	0.15921	0.0157073	0.843705	0.011062	0.661611	0.0130795
530	0.867047	0.0113115	0.844564	0.00458137	0.839118	0.0267962	0.813689	0.0253937	0.0850416	0.00842916	0.293366	0.0192856	0.746847	0.024879	0.103939	0.0109494	0.110188	0.0148324	0.380506	0.0113124	0.812767	0.017781	0.155843	0.0272658	0.843247	0.00886347	0.661982	0.0165166
535	0.860415	0.00751633	0.833226	0.0134344	0.856017	0.0060849	0.806492	0.0329194	0.0880458	0.00808791	0.304794	0.0242206	0.752494	0.0152278	0.105799	0.0107164	0.107684	0.0144907	0.37986	0.0111189	0.81208	0.0228895	0.156278	0.014952	0.841174	0.0154201	0.660155	0.00542202
540	0.875465	0.0195326	0.838512	0.00250514	0.848944	0.012341	0.815885	0.0386205	0.0801105	0.0144883	0.296589	0.0215321	0.741928	0.0136759	0.099207	0.0106908	0.110872	0.0249509	0.383364	0.0164957	0.813368	0.0145953	0.147864	0.0245821	0.842755	0.011149	0.659373	0.00960912
545	0.869256	0.0094709	0.841964	0.00256667	0.849763	0.0127944	0.800484	0.029784	0.0749193	0.0154717	0.292031	0.0178709	0.7395	0.0148036	0.10848	0.0077168	0.107837	0.0105038	0.375211	0.0136843	0.81353	0.0113592	0.148162	0.00944591	0.849814	0.0140275	0.657287	0.00758533
550	0.870672	0.0104205	0.845327	0.00726484	0.84341	0.0113383	0.810111	0.0355849	0.0822752	0.00682043	0.301302	0.0235893	0.746339	0.0171538	0.0962879	0.0148037	0.113293	0.0199116	0.393016	0.0146953	0.815585	0.0106561	0.15179	0.0123685	0.843726	0.0115834	0.661315	0.00884925
555	0.87178	0.0214291	0.853007	0.00799132	0.849008	0.0218403	0.80481	0.0338647	0.0764767	0.0202343	0.294939	0.0290916	0.743609	0.02539	0.0967248	0.0125035	0.115353	0.0197237	0.376594	0.0106777	0.816818	0.0188601	0.150713	0.0230722	0.844335	0.010611	0.652077	0.0110602
560	0.867004	0.0110042	0.841545	0.00216665	0.845276	0.0152951	0.803269	0.0340744	0.0848767	0.00920503	0.290921	0.0178382	0.744322	0.00467011	0.099182	0.00983544	0.11149	0.011728	0.367381	0.00779317	0.805099	0.0121112	0.14825	0.0163066	0.843841	0.010044	0.649431	0.00913685
565	0.863453	0.0163243	0.829697	0.00377571	0.844691	0.010262	0.800226	0.0346363	0.0821355	0.0153916	0.291105	0.0162589	0.744069	0.0162572	0.0907691	0.014051	0.110261	0.0166902	0.364616	0.0123744	0.805301	0.0198127	0.145619	0.0155455	0.844286	0.0125343	0.65293	0.0153078
570	0.870425	0.0169049	0.835995	0.00981132	0.849403	0.0153204	0.80699	0.0397679	0.0785444	0.00578928	0.287826	0.0176967	0.738725	0.019898	0.0980244	0.0153084	0.111252	0.0106634	0.365581	0.0198273	0.81267	0.0284325	0.14593	0.00252539	0.842405	0.00999611	0.643899	0.0107312
575	0.868943	0.0218238	0.830943	0.00791733	0.849699	0.0159466	0.805334	0.0407826	0.0667334	0.0134566	0.278682	0.0199544	0.739469	0.0132237	0.0912285	0.0125809	0.103975	0.0175937	0.364145	0.0145185	0.80501	0.0177979	0.150428	0.0176419	0.848176	0.0120337	0.652539	0.0134523
580	0.873092	0.0166931	0.832963	0.0141663	0.850562	0.00983736	0.797049	0.0350833	0.076182	0.0098772	0.289766	0.0188367	0.740219	0.0218895	0.0936012	0.0148728	0.103339	0.00312689	0.361992	0.00929303	0.798477	0.0236262	0.148197	0.0151352	0.848636	0.0105883	0.640616	0.0128628
585	0.863602	0.00370291	0.846596	0.0149571	0.852377	0.0118431	0.805034	0.0331412	0.0699043	0.0105222	0.285467	0.0200215	0.741817	0.023296	0.0916813	0.0059218	0.109637	0.0157126	0.359543	0.0110611	0.794223	0.017321	0.138803	0.0115126	0.841266	0.00842327	0.642713	0.009958
590	0.86624	0.0193151	0.833589	0.00732325	0.856395	0.0157778	0.804327	0.0363017	0.0790649	0.0184628	0.286002	0.0137513	0.742041	0.0251895	0.0950943	0.00403054	0.105466	0.00238403	0.359558	0.0194256	0.801285	0.0180516	0.149813	0.0169142	0.842247	0.0106273	0.63971	0.00980199
595	0.867585	0.0223369	0.832786	0.00693234	0.853654	0.0131978	0.799961	0.0416012	0.078298	0.0122418	0.27775	0.0278778	0.735292	0.0209442	0.093341	0.00364674	0.0986379	0.0262631	0.360574	0.0189113	0.790035	0.0270304	0.149043	0.0141384	0.841936	0.0158704	0.635588	0.0117893
600	0.868649	0.00676341	0.835134	0.00544791	0.842752	0.0107679	0.792315	0.0235881	0.0760853	0.00665005	0.272621	0.0189857	0.733176	0.0156604	0.0853619	0.00623816	0.104341	0.0100356	0.361755	0.0197977	0.804478	0.0111809	0.140078	0.0182982	0.845972	0.0115797	0.636663	0.0105858
605	0.878986	0.0134512	0.841709	0.0135965	0.855294	0.00832857	0.777881	0.0197812	0.0712839	0.0160515	0.276866	0.0233106	0.725555	0.0187082	0.0863747	0.00730983	0.100743	0.0160082	0.354954	0.0127121	0.801118	0.0192188	0.135629	0.0198208	0.843941	0.0130745	0.633472	0.00354649
610	0.868115	0.0220877	0.8291	0.00257499	0.852068	0.0218159	0.795674	0.0387429	0.0828785	0.00760081	0.273849	0.0250556	0.732208	0.0360321	0.086959	0.0131678	0.102381	0.0217206	0.341544	0.0120959	0.788663	0.0152571	0.142766	0.0148895	0.846688	0.0118386	0.635712	0.0127913
615	0.868398	0.0231901	0.831517	0.00576089	0.852579	0.0116207	0.794961	0.0306475	0.0596116	0.018707	0.268844	0.0198631	0.716027	0.0147896	0.0942379	0.00971505	0.107648	0.0145704	0.356062	0.00868979	0.802323	0.0180551	0.140523	0.0137483	0.846353	0.0139469	0.628668	0.0103268
620	0.875676	0.0132825	0.827954	0.00710141	0.848675	0.0143072	0.798165	0.0382097	0.0737233	0.0110467	0.267052	0.0134895	0.716635	0.0166311	0.0888862	0.0185541	0.101762	0.0124903	0.348199	0.0231517	0.800911	0.0140396	0.13703	0.0184178	0.844032	0.016574	0.625937	0.0102337
625	0.865059	0.0167553	0.830475	0.0121811	0.846919	0.0106104	0.787381	0.0304392	0.0742626	0.0080172	0.267759	0.0156456	0.726811	0.0306886	0.0953455	0.0129541	0.101789	0.00925672	0.351363	0.0171439	0.802223	0.014754	0.1438	0.0122903	0.844455	0.0131115	0.624985	0.0128301
630	0.868833	0.014516	0.832164	0.00177706	0.847194	0.0170453	0.787327	0.0260282	0.0695441	0.018459	0.265329	0.0235734	0.719179	0.0166039	0.0843871	0.0119297	0.103818	0.00768543	0.350021	0.0159203	0.797849	0.00663348	0.14009	0.0125357	0.844518	0.0153923	0.628806	0.00434915
635	0.861912	0.0147382	0.828674	0.00510234	0.849363	0.0184756	0.796291	0.0287148	0.0680183	0.00997188	0.261641	0.0181083	0.721545	0.00757118	0.078622	0.00643552	0.093906	0.00778414	0.351121	0.019389	0.790361	0.015768	0.142456	0.0154404	0.843439	0.00959126	0.632239	0.0053882
640	0.86656	0.0113512	0.828869	0.00891211	0.848269	0.000737912	0.787338	0.0331295	0.0675579	0.0110885	0.259393	0.00909581	0.712601	0.0312239	0.0914916	0.00764556	0.0999468	0.0140972	0.344807	0.0120034	0.805833	0.00837535	0.139605	0.0164217	0.845759	0.015578	0.630434	0.0124785
645	0.86422	0.0114408	0.836239	0.0122244	0.849632	0.0220649	0.807145	0.0256557	0.0710199	0.00685919	0.252876	0.0155339	0.714624	0.02538	0.0908288	0.00865732	0.10206	0.0120054	0.349403	0.00558305	0.798274	0.0165592	0.133837	0.0161216	0.845119	0.0136037	0.624661	0.00460003
650	0.879918	0.0145793	0.816717	0.0158662	0.850002	0.0109834	0.787708	0.0263139	0.0530069	0.00803401	0.264324	0.0183867	0.720727	0.0250715	0.0887844	0.0100673	0.0983722	0.0213746	0.341123	0.012222	0.786367	0.0191231	0.138305	0.0164882	0.846281	0.00965598	0.620733	0.0121138
655	0.863413	0.0168829	0.828914	0.0133704	0.854887	0.0174546	0.78585	0.0263744	0.0604688	0.0109372	0.254151	0.0219016	0.722331	0.0182381	0.0817408	0.0167219	0.0931751	0.0164397	0.337319	0.0169299	0.789135	0.0127706	0.134369	0.0100994	0.84684	0.0147298	0.617452	0.00806485
660	0.863154	0.0155348	0.841925	0.00992733	0.844113	0.00782539	0.80377	0.0216303	0.0649968	0.0105359	0.255851	0.0231865	0.720846	0.00821512	0.0837915	0.0102932	0.0993372	0.00712603	0.342371	0.0179873	0.788646	0.0195412	0.130683	0.0138508	0.849321	0.00981615	0.623984	0.00671003
665	0.867537	0.0137325	0.834513	0.0106513	0.846986	0.00702744	0.802843	0.0135802	0.0665168	0.00835632	0.255726	0.0114638	0.722115	0.0182746	0.08741	0.00559647	0.0985881	0.018568	0.339454	0.0180334	0.792937	0.0149552	0.135614	0.0146733	0.849738	0.00715194	0.623059	0.0125864
670	0.868547	0.0203715	0.831395	0.0186927	0.847018	0.0147189	0.801458	0.0189085	0.0679217	0.00598581	0.251443	0.0219066	0.712096	0.024128	0.087381	0.0158396	0.109532	0.0125091	0.332023	0.0175025	0.787017	0.0233527	0.129162	0.0163567	0.844371	0.014847	0.613769	0.0127275
675	0.862269	0.0247906	0.830129	0.00959176	0.852461	0.0171586	0.797432	0.0103636	0.0623552	0.00210366	0.251915	0.0176365	0.708503	0.0315147	0.0821111	0.0122392	0.0939037	0.0172777	0.340707	0.00606477	0.794747	0.0161624	0.132641	0.00870297	0.842205	0.014243	0.614977	0.00838693
680	0.86349	0.0147875	0.815692	0.0136736	0.844207	0.0207357	0.799162	0.0103915	0.0660837	0.0131936	0.24182	0.0249619	0.703801	0.0208561	0.0799406	0.00508174	0.0976883	0.00884455	0.336879	0.011209	0.793685	0.0176408	0.125586	0.0141489	0.844277	0.0166834	0.613363	0.00584955
685	0.85804	0.0134103	0.828563	0.0122264	0.851284	0.0118821	0.789177	0.0189664	0.0689429	0.00977068	0.248077	0.023808	0.717143	0.00816541	0.0777699	0.00385552	0.0905524	0.0174503	0.334099	0.0119796	0.779074	0.0154523	0.131889	0.0232871	0.842071	0.0150749	0.617671	0.00963527
690	0.856869	0.0154119	0.821784	0.00981649	0.85088	0.0132456	0.791547	0.0140757	0.0496246	0.00731147	0.242927	0.0246732	0.703951	0.0237472	0.0777169	0.0163931	0.0888236	0.0120918	0.329439	0.0140841	0.781833	0.0152036	0.132632	0.0229398	0.844231	0.00975156	0.602683	0.0047579
695	0.865757	0.0175695	0.82108	0.0120364	0.843449	0.0120695	0.799571	0.0218942	0.0569381	0.0113628	0.246473	0.0176584	0.711343	0.0174057	0.0815447	0.0196412	0.0885157	0.00557291	0.338824	0.0140992	0.785431	0.0231481	0.131711	0.0233582	0.846758	0.00896242	0.60821	0.0151888
700	0.863987	0.0173042	0.830928	0.00388485	0.851535	0.0154162	0.790068	0.00878669	0.0560809	0.012906	0.238238	0.0248465	0.710318	0.0277403	0.0807259	0.00922726	0.0865531	0.0147802	0.329683	0.0156195	0.777345	0.0135719	0.130059	0.0221819	0.845218	0.0183921	0.603198	0.00195802
705	0.861337	0.00708545	0.833151	0.00993553	0.849854	0.00731949	0.792454	0.0293364	0.0589228	0.0131304	0.243929	0.015978	0.703978	0.0180855	0.0843121	0.0119912	0.0967938	0.00551659	0.332985	0.0147407	0.783556	0.020671	0.129507	0.0128746	0.841995	0.0147078	0.605725	0.00457229
710	0.874723	0.0139481	0.82585	0.0133216	0.848937	0.017814	0.792462	0.0215337	0.0663872	0.00817178	0.239676	0.024966	0.700876	0.0274219	0.0823894	0.0148766	0.0938038	0.00514568	0.322116	0.0129627	0.782362	0.0230119	0.133717	0.0187497	0.847905	0.0090344	0.601975	0.0109466
715	0.867064	0.0251833	0.824915	0.0117466	0.849369	0.0128296	0.799176	0.0148127	0.0570513	0.00666726	0.237949	0.018428	0.699243	0.0207081	0.0790576	0.0134474	0.0898864	0.0224616	0.328181	0.0159341	0.772248	0.0168506	0.128722	0.0181716	0.842178	0.0144952	0.604754	0.01019
720	0.86528	0.0117459	0.825138	0.0121056	0.844529	0.0125312	0.790509	0.0215116	0.0587313	0.00982176	0.238655	0.0241314	0.710552	0.0204592	0.0780447	0.00553604	0.0927571	0.0154652	0.305621	0.00949145	0.767412	0.0216898	0.127638	0.0161892	0.847414	0.0119178	0.593832	0.0146183
725	0.859176	0.0108816	0.827591	0.0139363	0.841021	0.0137763	0.790115	0.0112102	0.0596398	0.0165633	0.235113	0.0283274	0.705482	0.0282782	0.0796309	0.00233884	0.0951123	0.0105178	0.322844	0.0164796	0.773726	0.0318227	0.124985	0.015703	0.842366	0.01361	0.59142	0.00145094
730	0.870827	0.0172941	0.819583	0.0107832	0.850088	0.00991403	0.789155	0.0185948	0.0685559	0.0167718	0.234711	0.0169773	0.702724	0.0296668	0.0786564	0.0039867	0.0887088	0.013046	0.31723	0.0167258	0.770951	0.0206415	0.116067	0.00687442	0.844345	0.0157078	0.601182	0.00178898
735	0.856423	0.0150332	0.826758	0.0122669	0.853149	0.00818135	0.794522	0.0201281	0.0658742	0.00908016	0.238735	0.0194223	0.696621	0.0153057	0.0778735	0.00572932	0.0906767	0.0197161	0.318039	0.0165624	0.770326	0.0329563	0.119745	0.0119742	0.837288	0.00925131	0.589513	0.0100135
740	0.867576	0.0224551	0.821004	0.0108899	0.845499	0.00866085	0.791859	0.0215254	0.060174	0.0130792	0.24447	0.0165767	0.697725	0.0103777	0.0827863	0.00453442	0.0831397	0.00868425	0.31972	0.0207753	0.771112	0.0252754	0.125301	0.00697839	0.843294	0.0120721	0.598864	0.00512451
745	0.867371	0.020329	0.819363	0.00801526	0.851754	0.00646955	0.801837	0.0157621	0.0550407	0.00885941	0.235364	0.0246321	0.698281	0.0205434	0.0778211	0.00450995	0.0918808	0.0201842	0.317099	0.0129027	0.766875	0.0240166	0.125813	0.021171	0.846362	0.0148323	0.59434	0.00976037
750	0.858392	0.0254795	0.813722	0.00497899	0.848849	0.00990625	0.790596	0.0124987	0.0618435	0.01421	0.236749	0.0243109	0.70649	0.0148436	0.0773488	0.00656219	0.0838305	0.0229608	0.310845	0.0128621	0.776754	0.014407	0.116089	0.0147191	0.84589	0.0111583	0.595091	0.0102561
755	0.853962	0.0225871	0.821605	0.00945897	0.847151	0.00767927	0.789116	0.0235944	0.061062	0.0104598	0.230649	0.019138	0.693075	0.0165705	0.0839675	0.0116477	0.0809317	0.00874341	0.30678	0.0193627	0.764027	0.0104698	0.118113	0.0208424	0.846976	0.012767	0.592236	0.010653
760	0.869204	0.0157099	0.826375	0.0118247	0.840767	0.00992557	0.798264	0.0125237	0.0504195	0.00855874	0.229024	0.0152301	0.689179	0.00848473	0.0748391	0.00535017	0.0765039	0.0209295	0.309738	0.0201757	0.768876	0.0279118	0.131946	0.0152605	0.844634	0.0122792	0.587842	0.0125931
765	0.866133	0.00819928	0.819506	0.00960129	0.845304	0.0051149	0.787278	0.0114684	0.0553689	0.00831771	0.21773	0.0239211	0.689033	0.0155805	0.0803278	0.00619055	0.08229	0.0115499	0.305436	0.00934647	0.765094	0.0209881	0.122562	0.027036	0.844043	0.0142448	0.581648	0.00904734
770	0.863715	0.0115529	0.820569	0.0067161	0.846635	0.00787761	0.794607	0.0117108	0.0520795	0.0128262	0.231374	0.0142115	0.69419	0.0202821	0.0801412	0.00634248	0.086182	0.0121183	0.304578	0.0146318	0.772867	0.0289094	0.119808	0.0216562	0.845787	0.0097049	0.592675	0.0101296
775	0.865464	0.0235468	0.820608	0.00277757	0.842794	0.00778747	0.786914	0.0100671	0.0620386	0.00972671	0.223201	0.0110283	0.685602	0.0314595	0.0820069	0.00211102	0.0883797	0.017933	0.30143	0.0159563	0.76466	0.0196625	0.119146	0.0173634	0.842022	0.00830594	0.585907	0.00687201
780	0.863974	0.0107296	0.81881	0.0105299	0.844968	0.0321168	0.781862	0.0192162	0.0587733	0.0171877	0.221587	0.0199242	0.684363	0.012433	0.0698579	0.00702999	0.0838768	0.0124622	0.308813	0.0241645	0.759592	0.0223599	0.117766	0.011215	0.842712	0.0163722	0.584482	0.00624523
785	0.863856	0.00273281	0.819784	0.00594988	0.842425	0.00979048	0.79246	0.0127672	0.0594388	0.00277241	0.221781	0.0173782	0.679309	0.0246605	0.0753525	0.00465961	0.079679	0.00895544	0.299985	0.0241782	0.752412	0.0292833	0.115777	0.00684802	0.849221	0.0126495	0.581232	0.0111378
790	0.855373	0.0198413	0.81072	0.00444321	0.841013	0.00472714	0.783037	0.00883402	0.0555982	0.011369	0.217494	0.0179013	0.677764	0.0209813	0.0738084	0.0108701	0.0851696	0.0141416	0.301864	0.0169375	0.75857	0.0209411	0.117154	0.0206666	0.842604	0.0100915	0.584129	0.0136739
795	0.861154	0.0169739	0.818429	0.0114285	0.847984	0.0100338	0.78497	0.0218037	0.0592292	0.0101005	0.21934	0.0157681	0.69015	0.017324	0.08031	0.0189482	0.0906369	0.00952056	0.301599	0.020667	0.761593	0.028265	0.124718	0.00873363	0.844374	0.0132365	0.581792	0.00214118
800	0.864278	0.0187008	0.816757	0.00812052	0.840753	0.00738131	0.782775	0.00986466	0.0523422	0.00669026	0.221942	0.0192206	0.689249	0.0214261	0.0790109	0.00984967	0.0828357	0.0146256	0.304412	0.0103456	0.757944	0.0262703	0.118328	0.0205585	0.846253	0.0164664	0.58443	0.020087
805	0.858764	0.020706	0.821757	0.0109479	0.846585	0.0139577	0.789611	0.0108865	0.0574209	0.00898082	0.222989	0.0144035	0.682603	0.0168276	0.0743371	0.00480709	0.0825977	0.0169357	0.293939	0.0162321	0.749682	0.022956	0.11344	0.0112492	0.842795	0.010327	0.582497	0.00550119
810	0.856449	0.0141597	0.816039	0.0177368	0.848962	0.0133287	0.781439	0.011511	0.04961	0.00382343	0.218966	0.0248616	0.677885	0.0242116	0.0717544	0.00223563	0.0790824	0.00898736	0.297797	0.0154055	0.747837	0.0207738	0.119353	0.0186166	0.843486	0.0144383	0.581345	0.00580668
815	0.85156	0.0150637	0.822771	0.00286927	0.848497	0.00650306	0.782994	0.0154947	0.0553886	0.00880651	0.215806	0.0239298	0.675803	0.0210995	0.0822558	0.0108933	0.0854652	0.01303	0.295367	0.022741	0.751321	0.0194239	0.11283	0.0198626	0.842064	0.0144515	0.578924	0.00934084
820	0.861415	0.0204867	0.822137	0.00694021	0.844462	0.0164522	0.78571	0.0136445	0.0471739	0.0124749	0.207774	0.0185159	0.678109	0.0179957	0.083481	0.00357421	0.0823434	0.015439	0.286158	0.0266053	0.761393	0.0186318	0.117937	0.00753662	0.843089	0.00886953	0.578433	0.00373909
825	0.857877	0.0211532	0.803597	0.00757042	0.857586	0.0155684	0.786735	0.00710508	0.0578381	0.00278873	0.215087	0.0267641	0.68217	0.0171912	0.0831204	0.00424422	0.0802601	0.0126176	0.295849	0.0209464	0.756066	0.0115004	0.125256	0.0165431	0.837053	0.0102474	0.573485	0.00303757
830	0.854012	0.00868384	0.81888	0.013807	0.849129	0.0219944	0.780813	0.0199366	0.0470732	0.0154137	0.216498	0.0175327	0.682723	0.0158874	0.0738317	0.0015833	0.0766828	0.0212747	0.290208	0.00641061	0.7636	0.0291664	0.120349	0.0129842	0.845776	0.016336	0.576872	0.00883176
835	0.858237	0.026788	0.813135	0.0145879	0.85809	0.0170787	0.786691	0.0290349	0.055684	0.012795	0.21081	0.0254678	0.67236	0.0232211	0.077859	0.000961626	0.0746815	0.0175946	0.287573	0.0116107	0.762622	0.0256303	0.117928	0.0175217	0.841202	0.011467	0.580628	0.00321312
840	0.862984	0.0218937	0.814755	0.022699	0.837633	0.019114	0.791743	0.0193154	0.0508967	0.0109455	0.208864	0.0266791	0.675072	0.024156	0.0702453	0.0106297	0.0742398	0.019879	0.287172	0.0199181	0.747584	0.0254289	0.118944	0.00326749	0.84356	0.0153976	0.575958	0.00359284
845	0.858861	0.0155396	0.820782	0.00719617	0.852361	0.0199744	0.784424	0.00994286	0.0436382	0.0120718	0.209765	0.0229574	0.687383	0.0325918	0.0691459	0.00562868	0.0762285	0.00429429	0.289576	0.0240861	0.752572	0.023429	0.115999	0.014726	0.840925	0.0148736	0.571626	0.00413255
850	0.859185	0.0114413	0.81332	0.0093819	0.854624	0.0225576	0.789874	0.0138269	0.0502929	0.00813314	0.205713	0.0149815	0.671359	0.0111992	0.071539	0.00439271	0.0669358	0.010855	0.290851	0.00852377	0.74497	0.0312753	0.11121	0.00064732	0.840433	0.0136684	0.570787	0.00287295
855	0.863719	0.0128734	0.814493	0.0139752	0.844584	0.0184833	0.773174	0.00805532	0.0421992	0.00817869	0.200592	0.0182823	0.681436	0.0223018	0.0748676	0.00220845	0.0751421	0.0136723	0.275402	0.00709852	0.747956	0.021938	0.114996	0.0130691	0.841382	0.014215	0.570447	0.0123168
860	0.852705	0.00745739	0.808837	0.00873266	0.844659	0.015748	0.783849	0.018662	0.0475173	0.0150135	0.204903	0.0108107	0.671502	0.0359335	0.0752788	0.00733045	0.0821473	0.0108621	0.288334	0.0212956	0.742582	0.0218428	0.11703	0.00660533	0.843956	0.0143369	0.564588	0.0016563
865	0.866087	0.0226433	0.814328	0.0181835	0.840708	0.014794	0.78656	0.0104469	0.0591786	0.0236264	0.212378	0.0192833	0.665181	0.0189019	0.0722212	0.00343755	0.0792858	0.00784997	0.290518	0.023197	0.754597	0.0194514	0.114381	0.0177169	0.841523	0.014272	0.572268	0.0106582
870	0.857163	0.019969	0.815871	0.0103642	0.843683	0.012285	0.772529	0.023422	0.044454	0.0178355	0.195262	0.0146725	0.664666	0.0128801	0.0698983	0.00831259	0.0805231	0.00174707	0.282036	0.0102663	0.753844	0.0290954	0.11504	0.0192821	0.850178	0.0142633	0.567414	0.00986151
875	0.859888	0.0217496	0.814005	0.00651216	0.846542	0.0212303	0.777418	0.00447176	0.0428897	0.00755279	0.205285	0.0133703	0.669571	0.0158725	0.0723217	0.00359066	0.0773832	0.0215361	0.279258	0.0121801	0.747135	0.0220047	0.113429	0.0141315	0.846231	0.0131657	0.564509	0.0133338
880	0.863248	0.0200976	0.807777	0.0135877	0.839436	0.00699156	0.784904	0.0215802	0.0441286	0.00502133	0.202946	0.0340847	0.668069	0.0211741	0.0696636	0.00420544	0.0804	0.0133392	0.268865	0.00783385	0.736348	0.0273942	0.108454	0.0180011	0.849639	0.0114464	0.566175	0.0136681
885	0.857737	0.0149849	0.81565	0.00995383	0.84209	0.00888478	0.77167	0.017426	0.0440681	0.0114742	0.203729	0.02572	0.665892	0.024541	0.0694732	0.00867046	0.0783813	0.0135723	0.272814	0.00758406	0.742733	0.0285709	0.120342	0.0148871	0.841998	0.0140775	0.569956	0.00763368
890	0.857253	0.0129693	0.803569	0.00673949	0.846879	0.0166142	0.775221	0.0224917	0.0440882	0.00523127	0.197781	0.0139859	0.667026	0.0220479	0.0655613	0.00983651	0.081105	0.0103536	0.284773	0.0213407	0.737996	0.020157	0.112196	0.017699	0.840122	0.0155348	0.564816	0.00887795
895	0.86376	0.0097609	0.813334	0.00811925	0.836852	0.00901943	0.769386	0.0172469	0.0421555	0.0127994	0.19586	0.0188113	0.668065	0.0254162	0.0766363	0.00941177	0.074578	0.00937269	0.284759	0.0137318	0.747962	0.0243602	0.112156	0.0204989	0.842955	0.0109385	0.561598	0.00856806
900	0.8529	0.0180425	0.799242	0.0240084	0.855422	0.0172119	0.77291	0.020017	0.0476766	0.0127995	0.195068	0.0192362	0.663726	0.0133208	0.0756722	0.00727755	0.0738116	0.00983778	0.28566	0.00796649	0.740334	0.0224713	0.108841	0.01707	0.842999	0.0179511	0.561919	0.00494683
905	0.854966	0.0257191	0.815782	0.00582428	0.844128	0.0177268	0.783049	0.0209288	0.0430587	0.000237804	0.186002	0.0264326	0.659236	0.0198414	0.0653494	0.00547231	0.0808326	0.0160399	0.278638	0.0128536	0.750503	0.0169704	0.107464	0.00689706	0.84119	0.00996159	0.558265	0.00831957
910	0.856971	0.0124081	0.809462	0.0037585	0.844758	0.0206779	0.789573	0.0268571	0.0411856	0.0189767	0.194788	0.0227021	0.66462	0.0169787	0.0707658	0.00679867	0.0739417	0.0253926	0.277738	0.0221839	0.73598	0.0164557	0.108729	0.0209664	0.84057	0.0115144	0.557939	0.00938445
915	0.845957	0.0224182	0.79816	0.00902258	0.843339	0.00970902	0.773494	0.0108891	0.0478706	0.0129431	0.200237	0.0219587	0.666013	0.0204295	0.0623583	0.00627733	0.0728286	0.015198	0.27215	0.00824875	0.742307	0.0365371	0.118015	0.0274427	0.845298	0.016188	0.561018	0.00419082
920	0.857412	0.0145851	0.811061	0.019462	0.851343	0.0037164	0.769369	0.0100846	0.0377635	0.0120253	0.194958	0.0187647	0.650387	0.0207148	0.0643418	0.00722899	0.0659457	0.015255	0.270127	0.0104996	0.72774	0.0186828	0.116032	0.0125371	0.839986	0.0141663	0.557037	0.00524323
925	0.853401	0.0156863	0.81222	0.0116648	0.837458	0.00125802	0.771377	0.0196587	0.0428224	0.00912717	0.20011	0.0270305	0.657474	0.016256	0.059505	0.0145755	0.0794757	0.016119	0.268756	0.017972	0.739111	0.0160234	0.110635	0.0204276	0.83726	0.0110148	0.558345	0.00953313
930	0.857635	0.0142028	0.811131	0.00944255	0.838333	0.0176037	0.777766	0.0268062	0.0386	0.0129713	0.189627	0.022056	0.657824	0.0243839	0.0681046	0.00735081	0.0720242	0.0185216	0.266744	0.0204223	0.744019	0.0201292	0.117942	0.013016	0.845304	0.0173734	0.555256	0.00306215
935	0.85729	0.0180804	0.810073	0.00540964	0.862474	0.0186442	0.776774	0.0192165	0.0387633	0.0109629	0.196286	0.0161172	0.664361	0.0273404	0.0649038	0.00310383	0.0736842	0.0130452	0.262476	0.015666	0.735534	0.0182942	0.103386	0.0160399	0.846793	0.013348	0.555096	0.0134822
940	0.863179	0.013171	0.806222	0.0108651	0.853749	0.020087	0.775051	0.0141817	0.0411228	0.0120941	0.187761	0.0256515	0.653782	0.0208296	0.0644801	0.00751729	0.0709268	0.0138889	0.269992	0.017144	0.736786	0.0180691	0.105317	0.0158384	0.843316	0.0125643	0.548779	0.0156601
945	0.851486	0.0167834	0.80725	0.00500276	0.841329	0.0108092	0.766491	0.0179625	0.0433377	0.0145256	0.191235	0.0284816	0.659606	0.0237294	0.0608518	0.00528583	0.064535	0.0121601	0.269937	0.0143388	0.737225	0.026219	0.104808	0.0197329	0.843176	0.0128089	0.547073	0.0133743
950	0.862683	0.01986	0.814451	0.00598508	0.851881	0.0211723	0.774255	0.0178373	0.0452902	0.0204112	0.190163	0.0249342	0.654394	0.023027	0.0780463	0.00628579	0.0681107	0.0118876	0.266981	0.0169635	0.721922	0.0234423	0.107444	0.0126896	0.842581	0.0154414	0.545196	0.00707982
955	0.859269	0.0208821	0.807529	0.00810028	0.858804	0.0267766	0.770944	0.00956907	0.0375606	0.0182914	0.192201	0.0148414	0.653682	0.0285601	0.0595977	0.0023565	0.0724907	0.011523	0.261418	0.0210314	0.733156	0.0365447	0.105119	0.016682	0.843398	0.0112233	0.547779	0.0098501
960	0.865618	0.00869711	0.800984	0.0183497	0.847204	0.0122014	0.762726	0.0104466	0.0356316	0.0139148	0.188435	0.0198873	0.644594	0.0161687	0.06692	0.0135039	0.07041	0.00929275	0.262958	0.0208709	0.735688	0.0310318	0.104271	0.0193045	0.845411	0.0163232	0.554188	0.00651761
965	0.845526	0.00926843	0.808235	0.00965292	0.855815	0.0214336	0.769583	0.015949	0.0467405	0.0114171	0.184033	0.0222133	0.661779	0.0314168	0.0552653	0.00737354	0.0711213	0.0156983	0.263893	0.0118244	0.727021	0.0192952	0.110231	0.0137255	0.842431	0.0121133	0.54808	0.000168035
970	0.849208	0.0145246	0.801174	0.00679799	0.851578	0.0105943	0.767746	0.00858037	0.0379967	0.0066742	0.184184	0.0264339	0.658335	0.0241649	0.0634807	0.00253086	0.0659935	0.0143876	0.268674	0.0107584	0.739993	0.0359836	0.107034	0.0129232	0.843144	0.00987874	0.551587	0.00157717
975	0.850848	0.010552	0.812112	0.00523142	0.850409	0.0101941	0.758065	0.013217	0.0358819	0.0100844	0.189108	0.0207285	0.657194	0.0236202	0.0630545	0.0113142	0.0710684	0.00484046	0.264192	0.00489285	0.731148	0.0202678	0.103471	0.0133561	0.847315	0.0129101	0.540525	0.0110193
980	0.856491	0.013474	0.817801	0.00638286	0.844944	0.00941657	0.75622	0.0219966	0.0399731	0.0160272	0.187763	0.0137922	0.647795	0.0224725	0.0691426	0.00445315	0.0661911	0.0118017	0.264867	0.0178953	0.737543	0.036252	0.104921	0.0186304	0.840091	0.0137258	0.544975	0.0125477
985	0.85373	0.0184949	0.804509	0.00796699	0.843397	0.00462069	0.764636	0.00498501	0.0351541	0.0119846	0.189786	0.0216084	0.649345	0.0202101	0.0680895	0.00734547	0.0694865	0.0171296	0.263902	0.0192357	0.727891	0.0325314	0.108189	0.0226406	0.844142	0.0186469	0.54241	0.00968949
990	0.8541	0.0255442	0.808585	0.00269263	0.84355	0.00944566	0.773965	0.015184	0.0403983	0.0131174	0.177824	0.0216479	0.646365	0.0163773	0.0609009	0.00750238	0.0644546	0.0185272	0.251894	0.0119347	0.711218	0.0165203	0.102522	0.0202343	0.8422	0.011065	0.54863	0.0100602
995	0.868313	0.0176812	0.806747	0.0187482	0.850831	0.012965	0.76634	0.0173689	0.0309393	0.0056717	0.181557	0.018527	0.65512	0.0202964	0.0650107	0.00318804	0.0650487	0.0149904	0.260143	0.0195921	0.722132	0.0281072	0.101954	0.0248179	0.838949	0.013021	0.535844	0.0104311
1000	0.85778	0.014234	0.814185	0.00411336	0.856957	0.0152256	0.758324	0.00952063	0.0403727	0.003543	0.176129	0.0133717	0.653326	0.0294793	0.0592294	0.013845	0.0694437	0.00852573	0.264914	0.027731	0.717727	0.0191061	0.0946472	0.0191194	0.839903	0.0210515	0.549701	0.0120838
1005	0.87109	0.0192976	0.804642	0.00316503	0.856272	0.0193962	0.7637	0.0166958	0.0343223	0.0113287	0.176426	0.0322121	0.649779	0.0221457	0.0620315	0.00555576	0.070294	0.0213348	0.260618	0.00668654	0.721045	0.020532	0.10969	0.0220612	0.839393	0.0139386	0.543835	0.00402717
1010	0.854663	0.0209451	0.802199	0.00690334	0.839154	0.0229545	0.761291	0.0134636	0.0350612	0.00301389	0.175843	0.0154988	0.654179	0.0192516	0.0646577	0.00815248	0.0659157	0.0208316	0.251265	0.0246046	0.715889	0.0282859	0.0981908	0.00965261	0.840127	0.00949264	0.538224	0.00700586
1015	0.848278	0.0181931	0.814306	0.0141442	0.843476	0.0192606	0.774596	0.012377	0.0326916	0.0133484	0.181717	0.0194091	0.633775	0.0222964	0.0622269	0.007246	0.0643241	0.0205458	0.256721	0.0264344	0.722392	0.0185333	0.108024	0.0161031	0.845988	0.0107961	0.537989	0.00672437
1020	0.856748	0.0255159	0.794156	0.00326524	0.84718	0.023179	0.768766	0.00857356	0.0368663	0.0104751	0.171592	0.0229502	0.635028	0.0153685	0.0573385	0.00780447	0.0597357	0.0119109	0.260578	0.0187335	0.72089	0.0317561	0.107076	0.0145664	0.839589	0.0186732	0.539021	0.01217
1025	0.854049	0.0186181	0.807288	0.00899003	0.842613	0.011102	0.767918	0.0140995	0.0325945	0.00804604	0.179459	0.0231428	0.644548	0.0262346	0.0551954	0.00886833	0.0592172	0.00687895	0.25397	0.0119153	0.726845	0.0221905	0.106534	0.00680485	0.84613	0.0147842	0.53715	0.0106643
1030	0.849201	0.00490468	0.797066	0.0108451	0.854505	0.0171797	0.755992	0.0193464	0.0334942	0.00543717	0.17555	0.0179212	0.633543	0.0191911	0.060432	0.0143455	0.067577	0.00643472	0.259961	0.0171169	0.715344	0.0396118	0.101941	0.013577	0.846465	0.0148098	0.53245	0.00835346
1035	0.852386	0.0122661	0.805662	0.00857126	0.84559	0.0198362	0.74718	0.0150547	0.0376802	0.0135612	0.168051	0.024689	0.639086	0.0250234	0.0567032	0.00245174	0.0689948	0.0130436	0.249893	0.0209027	0.72146	0.0158849	0.0916903	0.014936	0.840283	0.0142726	0.527177	0.0026254
1040	0.859057	0.00628215	0.808186	0.00993843	0.839619	0.0137092	0.763685	0.00388223	0.0325154	0.00632407	0.170942	0.0228366	0.634279	0.0230026	0.0597538	0.0073381	0.0618358	0.0155838	0.254435	0.00644954	0.715462	0.0304844	0.106406	0.0133966	0.843623	0.0152839	0.539923	0.00762305
1045	0.857017	0.00669468	0.817303	0.0112137	0.855584	0.0148442	0.766773	0.0148217	0.0346676	0.0109952	0.167838	0.0110016	0.646203	0.0328655	0.0590514	0.00300394	0.0630885	0.0117721	0.253983	0.0179979	0.719655	0.0152274	0.096721	0.0113007	0.845685	0.0119297	0.534442	0.00602698
1050	0.864125	0.0100829	0.799234	0.00561622	0.844776	0.00373468	0.760946	0.00421511	0.0292069	0.0162213	0.168784	0.0268336	0.634397	0.0230088	0.0663328	0.00167967	0.059931	0.0101113	0.238897	0.0128639	0.716776	0.0330016	0.0985693	0.0187459	0.834705	0.0122836	0.539573	0.00489709
1055	0.850697	0.0241717	0.80211	0.0122042	0.843104	0.021254	0.768657	0.00391323	0.0328235	0.0173491	0.172382	0.0184201	0.633616	0.0326108	0.0539075	0.0120154	0.062781	0.0234905	0.252449	0.0292955	0.715652	0.0286017	0.100356	0.0110512	0.844112	0.0137592	0.524083	0.014491
1060	0.844927	0.0106429	0.803719	0.012864	0.855752	0.0182835	0.764577	0.00866137	0.0344565	0.00427551	0.168295	0.0203407	0.640052	0.0241398	0.058588	0.0101122	0.066823	0.0118415	0.242441	0.0230449	0.708456	0.0244261	0.0989882	0.0205694	0.839376	0.0142141	0.534879	0.013911
1065	0.848734	0.0195987	0.797601	0.00740235	0.847439	0.00258316	0.761113	0.0161329	0.0313399	0.00546142	0.172788	0.022557	0.626404	0.0255699	0.0615451	0.00788086	0.0668571	0.0101784	0.248686	0.0183965	0.71031	0.0315259	0.102816	0.0156436	0.844504	0.0148737	0.532319	0.00617222
1070	0.842563	0.020178	0.805726	0.0161951	0.844531	0.0138165	0.760769	0.00424526	0.0357047	0.00169029	0.176785	0.0163353	0.639801	0.0259524	0.0564163	0.0172699	0.0546309	0.0137208	0.242231	0.0188131	0.702344	0.0186664	0.0927677	0.0173484	0.839651	0.0132902	0.52305	0.0107801
1075	0.84807	0.0160731	0.810634	0.00254919	0.86047	0.00740878	0.764946	0.01564	0.0310855	0.00374962	0.163809	0.0169447	0.616848	0.0227347	0.050886	0.0129512	0.0688344	0.0140523	0.242649	0.0103817	0.700805	0.0348153	0.102414	0.0155958	0.841807	0.0150107	0.527755	0.0169197
1080	0.844675	0.00891028	0.810509	0.0124188	0.846412	0.010469	0.764313	0.0118524	0.0308451	0.00586571	0.16386	0.0107334	0.63207	0.0334135	0.0529064	0.00763593	0.067913	0.0229368	0.244497	0.00480202	0.707568	0.0310868	0.0973235	0.0112054	0.842397	0.0186031	0.527268	0.0182145
1085	0.855405	0.0191076	0.808624	0.0146707	0.835156	0.0115253	0.753314	0.0151239	0.0299699	0.00617383	0.168818	0.020922	0.628813	0.0190532	0.052799	0.00853893	0.0621802	0.00729256	0.242001	0.0208845	0.704466	0.0271555	0.0929985	0.0127503	0.844406	0.0158608	0.533069	0.00145707
1090	0.862064	0.011427	0.7918	0.0098162	0.832518	0.0136346	0.751581	0.0112127	0.0292605	0.0133659	0.174685	0.0119619	0.621233	0.0206234	0.047356	0.00968684	0.0632749	0.0122223	0.24437	0.0186443	0.718399	0.0411981	0.0947561	0.0111352	0.845022	0.0137883	0.528868	0.00389601
1095	0.848915	0.0194323	0.794855	0.00586753	0.848344	0.0182766	0.758561	0.0138703	0.0286629	0.00468939	0.164655	0.00905183	0.623455	0.0205123	0.0540273	0.0201122	0.0636031	0.0231676	0.247872	0.0122153	0.697276	0.0302311	0.0969822	0.0171484	0.848389	0.0169029	0.5182	0.00969284
1100	0.845343	0.0148357	0.795661	0.00836414	0.837633	0.0103673	0.763729	0.0154348	0.0305309	0.0136754	0.16298	0.02207	0.636942	0.0333819	0.0637535	0.00654336	0.0607466	0.00858741	0.239894	0.0179655	0.707018	0.0232333	0.0984475	0.0167089	0.846221	0.0161941	0.529346	0.00749459
1105	0.850992	0.0206154	0.803393	0.00544781	0.851787	0.0183886	0.757216	0.00993958	0.0307423	0.00794177	0.164296	0.0224362	0.624576	0.0210725	0.058857	0.00642355	0.0648766	0.0158338	0.236718	0.0181924	0.690904	0.0271456	0.0982126	0.0101431	0.839649	0.0134617	0.523489	0.0159447
1110	0.840648	0.0238997	0.796507	0.0167001	0.84182	0.00748321	0.761415	0.0126276	0.0336651	0.0204897	0.162774	0.0133605	0.622991	0.0188301	0.0640963	0.0124076	0.0632748	0.0139495	0.242878	0.0139464	0.715065	0.0205126	0.106041	0.0161138	0.843387	0.0184759	0.520397	0.00310042
1115	0.845557	0.0136856	0.80256	0.00890572	0.837722	0.0173674	0.752766	0.0147166	0.0336595	0.00540005	0.158664	0.0158243	0.638913	0.026342	0.0542328	0.00803191	0.0615811	0.0102193	0.23321	0.014766	0.706863	0.0143355	0.0999604	0.0180175	0.840108	0.0203496	0.514041	0.00400234
1120	0.848555	0.0267379	0.785613	0.00499012	0.843896	0.0135505	0.756194	0.0142317	0.0288363	0.00588226	0.157693	0.0197398	0.628641	0.0152829	0.0564722	0.0017675	0.0649587	0.0162596	0.233482	0.0148166	0.708643	0.0315088	0.0920173	0.0289557	0.844052	0.0183637	0.520582	0.0104443
1125	0.837308	0.0108348	0.795135	0.0216961	0.851544	0.0126437	0.769625	0.00560611	0.0283047	0.0109523	0.164197	0.0190175	0.625197	0.031239	0.0531245	0.00877984	0.0584256	0.014534	0.239121	0.0180301	0.705249	0.030466	0.089849	0.0143086	0.845925	0.0126614	0.521524	0.0101951
1130	0.846656	0.00901499	0.794773	0.00200042	0.841616	0.0145571	0.744577	0.018216	0.0333324	0.0167174	0.165222	0.0149956	0.605255	0.0242361	0.0497375	0.0180198	0.0558332	0.0202947	0.234462	0.0129061	0.703854	0.02366	0.0994746	0.0251906	0.83933	0.0186503	0.517308	0.00853119
1135	0.83918	0.0135074	0.800146	0.00988131	0.845054	0.00333125	0.758804	0.00634333	0.0260871	0.0123223	0.159079	0.0192801	0.625802	0.0217177	0.0508852	0.00847141	0.0614591	0.0111629	0.235498	0.0144784	0.702969	0.0279857	0.0901264	0.0198079	0.842111	0.0217836	0.524168	0.00624341
1140	0.847854	0.0221903	0.788212	0.00923862	0.852737	0.014202	0.749265	0.0311942	0.0344775	0.00851436	0.164424	0.0125626	0.618738	0.0200141	0.0559925	0.00193695	0.0602627	0.0198032	0.230089	0.020759	0.696775	0.0230432	0.096584	0.016896	0.839859	0.0142445	0.520409	0.0171129
1145	0.84677	0.0246002	0.795967	0.0069843	0.853772	0.0160073	0.752876	0.0179655	0.0298708	0.0122787	0.158739	0.0256828	0.614368	0.0179342	0.0529849	0.0047705	0.0596539	0.012667	0.240924	0.0209279	0.713812	0.0162283	0.0930665	0.0164115	0.844986	0.0131775	0.5211	0.00764587
1150	0.840062	0.0154211	0.786466	0.00882913	0.845871	0.022103	0.752355	0.00666185	0.0295126	0.0122257	0.160652	0.0182928	0.625656	0.0122908	0.0507734	0.00853765	0.0595591	0.0133876	0.240338	0.0207056	0.698743	0.02946	0.0883415	0.015743	0.845485	0.0167245	0.516413	0.011795
1155	0.843119	0.00635357	0.796561	0.00727095	0.841202	0.019628	0.762418	0.0199052	0.0186935	0.0176754	0.146537	0.0223773	0.61624	0.0299562	0.0517636	0.00487434	0.0609005	0.0109838	0.240436	0.0235237	0.700033	0.0255899	0.0910284	0.0119545	0.838742	0.0133889	0.510222	0.0081443
1160	0.84191	0.0120829	0.802084	0.0166157	0.839195	0.00230716	0.749521	0.0258651	0.0370848	0.0104867	0.154603	0.0117269	0.618525	0.0206292	0.0521242	0.0103426	0.0557561	0.00787272	0.239791	0.0134808	0.692618	0.0291913	0.0933259	0.01791	0.840207	0.0214094	0.515421	0.00846671
1165	0.844975	0.0113011	0.79654	0.0111263	0.8504	0.00796493	0.752055	0.0196909	0.0280933	0.0080155	0.153351	0.0133922	0.617581	0.0327436	0.0549352	0.00835506	0.0531616	0.00322964	0.242627	0.0223465	0.691869	0.0324795	0.0892193	0.0202036	0.843889	0.0188021	0.515242	0.0050634
1170	0.854526	0.0150171	0.792606	0.011335	0.840306	0.0139125	0.762415	0.00447011	0.0245032	0.00802935	0.154266	0.0245071	0.618205	0.0334295	0.0552843	0.00563622	0.0543582	0.0226589	0.233537	0.0139688	0.695486	0.0276697	0.0903768	0.0153618	0.848923	0.0184559	0.516447	0.00783809
1175	0.844615	0.0138474	0.808339	0.0135836	0.844061	0.0129976	0.748151	0.00854806	0.0209836	0.00633482	0.148665	0.0243734	0.616735	0.0157155	0.057108	0.0100374	0.0627284	0.0135567	0.228787	0.0161526	0.693455	0.0176126	0.0950519	0.0184641	0.847116	0.0130969	0.513095	0.00556105
1180	0.83745	0.0240615	0.789417	0.00856732	0.853556	0.00807244	0.753715	0.00709801	0.0243213	0.0077896	0.150713	0.0298969	0.606556	0.0226815	0.0545519	0.00268629	0.0484869	0.00867067	0.233971	0.0072248	0.689529	0.0245115	0.0972487	0.024176	0.840702	0.0142373	0.510175	0.00571025
1185	0.85252	0.00991137	0.793959	0.0134794	0.843144	0.0126625	0.744927	0.0171054	0.0268734	0.00919699	0.150768	0.0226484	0.601381	0.0205747	0.0469048	0.00956537	0.0590995	0.0170106	0.224663	0.0166969	0.692499	0.0239374	0.083002	0.012865	0.842019	0.012196	0.510281	0.0116799
1190	0.84946	0.0142564	0.802681	0.00640758	0.841523	0.00893516	0.74851	0.00904538	0.0275817	0.0149085	0.148862	0.0245121	0.607345	0.0225237	0.0539599	0.0118486	0.0573151	0.00979156	0.230855	0.0198606	0.693182	0.0294191	0.0896101	0.00906697	0.84109	0.0203465	0.504378	0.00775204
1195	0.849989	0.0100196	0.798075	0.00691652	0.856651	0.0242641	0.750498	0.00481353	0.0274347	0.0156181	0.152356	0.027981	0.606641	0.0304493	0.0576722	0.00358564	0.0603325	0.0133487	0.225455	0.0133662	0.694883	0.0190294	0.0910728	0.00813065	0.839686	0.0154941	0.511291	0.00402873
1200	0.842461	0.0110369	0.794222	0.00891422	0.847897	0.0152976	0.740716	0.00888912	0.0225557	0.0103189	0.149462	0.0197618	0.605746	0.0251117	0.0530653	0.00542783	0.0594601	0.00749825	0.222978	0.0206861	0.702276	0.0262625	0.0979652	0.0174945	0.846694	0.0178041	0.499709	0.00289198
