# Supplementary material for: Specific lid-base contacts in the 26s proteasome control the conformational switching required for substrate degradation
Source: eLife. 2019 Nov 28;8:e49806. doi: 10.7554/eLife.49806 (PMC6910829; doi:10.7554/eLife.49806)
Supplement: Figure 5—figure supplement 1—source data 1. [file elife-49806-fig5-figsupp1-data1.xlsx]

## Sheet: Figure 5B
Final Calculated Rates
		k (obs) (per min)	SEM	n
	Wild-type Single Turnover	1.0128	0.1206	6
	Rpn5-VTENKIF Single Turnover	0.1266	0.01198	3
	Rpt6-EQ Single Turnover	0.4542	0.0396	3
	Wild-type Restarted	0.8616	0.1146	6
	Rpn5-VTENKIF Restarted	0.819	0.1092	3
	Rpt6-EQ Restarted	0.9042	0.1788	3

## Sheet: Figure 5C WT Titin
Wild-type Titin Degradations monitored by fluorescence polarization
	Time (s)	Wild-type Trial 1	Wild-type Trial 2	Wild-type Trial 3	Rpn5-VTENKIF Trial 1	Rpn5-VTENKIF Trial 2	Rpn5-VTENKIF Trial 3	Rpt6-EQ Trial 1	Rpt6-EQ Trial 2	Rpt6-EQ Trial 3	30c
	0	240.997	246.862	247.438	241.279	245.283	243.043	239.247	239.067	222.222	Polarization
	5	242.047	247.887	246.677	240.469	244.573	237.383	232.84	238.653	220.859				y0	y0	x0	x0	A1	A1	t1	t1	A2	A2	t2	t2	Statistics	Statistics
	10	239.011	239.716	244.048	233.918	240.175	234.848	229.282	234.168	222.93			Proteasome	Value	Standard Error	Value	Standard Error	Value	Standard Error	Value	Standard Error	Value	Standard Error	Value	Standard Error	Reduced Chi-Sqr	Adj. R-Square	t fast	t slow	k fast per min	k slow per min		Sub
	15	236.515	238.231	236.256	235.294	237.537	238.095	225	228.487	219.2			Wild-type Trial 1	131.068	1.63226	12.0715	--	46.8106	--	51.1385	2.41717	61.9125	--	732.57	46.9042	2.26009	0.99399	51.1385	732.57	1.17328	0.0819034	30c	WT titin
	20	237.311	233.618	228.916	234.604	236.842	231.638	220.056	225.225	214.863			Wild-type Trial 2	132.463	1.66184	10.2687	--	48.3313	--	46.7819	2.35991	60.6542	--	726.142	48.0901	2.62786	0.99257	46.7819	726.142	1.28255	0.0826285	30c	WT titin
	25	229.508	226.174	230.075	231.441	233.48	227.533	222.061	220.7	208.401			Wild-type Trial 3	126.092	2.39411	8.91466	--	53.6381	--	49.832	2.12431	63.6799	--	896.775	70.2776	2.28806	0.99358	49.832	896.775	1.20404	0.0669064	30c	WT titin
	30	227.397	219.373	224.736	229.868	232.117	225.191	218.659	213.313	211.726			Rpn5-VTENKIF Trial 1	154.385	3.16077	19.0067	--	34.49	--	79.7915	5.72924	44.2501	--	869.012	141.728	2.51321	0.98902	79.7915	869.012	0.75196	0.0690439	30c	WT titin
	35	219.178	219.373	218.563	224.67	228.739	220.729	215.227	214.502	211.726			Rpn5-VTENKIF Trial 2	156.948	2.00942	10.4422	--	45.6375	--	729.917	83.3485	38.3966	--	69.4504	4.75758	2.44563	0.98994	69.4504	729.917	0.863926	0.0822012	30c	WT titin
	40	216.917	217.639	217.262	224.67	224.67	220.077	213.45	212.03	215.107			Rpn5-VTENKIF Trial 3	154.203	2.90435	15.4802	--	34.519	--	68.9454	6.53528	45.0051	--	756.977	121.665	4.48593	0.98067	68.9454	756.977	0.870254	0.0792627	30c	WT titin
	45	215.259	216.023	211.394	221.733	223.529	220.077	209.985	206.687	211.921			Rpt6-EQ Trial 1	128.991	2.15693	17.192	--	34.5198	--	53.2606	3.45235	61.1339	--	791.393	63.7572	2.82048	0.99123	53.2606	791.393	1.12654	0.0758157	30c	WT titin
	50	210.383	211.429	210.134	220.741	223.529	222.222	206.442	204.819	209.226			Rpt6-EQ Trial 2	131.883	1.99376	9.76545	37803900	43.1765	38716600	42.1588	2.36048	59.2635	2752560	813.93	59.801	2.66271	0.99074	42.1588	813.93	1.42319	0.0737164	30c	WT titin
	55	208.731	208.571	206.587	220.089	217.778	218.391	201.175	201.201	205.255			Rpt6-EQ Trial 3	134.1	4.07182	31.1228	146669000	56.6375	9085770	914.285	137.259	21.545	48359600	65.3436	7.38348	4.5527	0.98165	65.3436	914.285	0.918224	0.0656251	30c	WT titin
	60	205.517	203.994	204.783	218.289	217.778	213.873	201.754	201.807	206.612
	65	204.39	203.966	201.201	216.617	216.617	214.7	200.59	199.396	201.331
	70	201.646	202.296	202.381	211.94	214.925	211.538	198.83	195.783	198.675				k fast per min	Standard Deviation
	75	199.454	202.878	198.804	213.65	213.115	207.692	192.931	193.353	196.013			Wild-type	1.21996	0.0563435
	80	201.646	201.717	197.623	212.575	213.115	211.538	194.118	197.568	198.003			Rpn5-VTENKIF	0.828713	0.0665456
	85	198.347	195.402	198.198	210.762	210.762	206.897	194.118	192.547	191.987			Rpt6-EQ	1.15598	0.253768
	90	194.483	194.805	194.611	210.682	210.762	206.897	192.308	192.547	194.03
	95	195.622	191.367	195.815	207.773	208.955	210.019	193.501	190.031	192.691
	100	195.055	191.919	191.617	207.154	208.955	203.065	189.427	190.698	194.03
	105	192.308	191.304	191.554	206.015	205.97	203.846	192.308	186.335	192.691
	110	195.055	188.489	190.405	205.397	204.173	203.065	195.301	186.916	190.083
	115	191.724	188.406	187.97	203.62	205.397	202.312	186.49	190.625	193.333
	120	189.488	187.773	186.747	204.204	203.593	200	189.349	186.441	190.713
	125	191.197	192.475	190.405	198.198	203.593	199.226	185.944	188.18	188.742
	130	190.014	187.861	185.52	202.399	203.593	196.154	185.185	185.759	189.456
	135	189.488	186.147	184.408	198.795	199.4	197.697	186.49	183.801	190
	140	186.722	186.147	187.311	203.593	202.399	200	188.791	185.07	186.777
	145	186.63	183.261	184.524	199.4	201.192	195.402	185.944	183.926	190.713
	150	185.596	186.782	183.183	196.992	202.399	197.697	183.432	183.926	188.742
	155	186.536	187.32	182.635	198.198	198.804	199.234	183.432	184.496	187.5
	160	184.979	182.734	182.09	195.783	198.198	193.858	180.617	180.835	185.55
	165	183.844	183.908	180.328	197.587	196.992	193.858	182.353	183.359	185.43
	170	182.073	183.261	182.635	197.605	198.795	192.381	180.617	183.486	183.333
	175	182.584	181.688	183.857	196.402	197.015	196.154	178.203	180.124	184.08
	180	183.099	179.191	179.104	195.195	193.985	193.858	181.149	180.835	182.867
	185	180.42	181.556	181.409	195.195	196.402	190.84	176.991	182.663	186.777
	190	180.282	178.827	178.571	191.617	195.195	192.381	178.203	177.019	181.518
	195	180.142	178.827	180.328	196.402	195.195	195.446	178.886	177.196	182.867
	200	179.126	182.857	181.009	195.195	193.985	192.381	177.843	181.395	184.211
	205	180.791	177.65	178.571	192.192	196.992	187.023	175.953	178.295	184.818
	210	183.099	180.516	178.571	195.195	196.402	190.114	176.471	178.295	182.119
	215	178.47	177.65	180.328	194.03	193.403	190.84	177.16	178.462	186.161
	220	180.282	178.161	175.595	194.57	192.771	192.381	179.039	178.295	181.518
	225	179.126	181.17	174.888	190.405	191.554	191.571	178.363	177.196	183.007
	230	179.632	177.65	176.647	193.403	191.617	189.293	173.529	176.471	184.211
	235	177.966	178.317	180.723	191.554	190.405	190.84	176.128	175.385	179.739
	240	177.622	178.827	174.174	190.405	192.192	189.293	178.363	174.652	176.277
	245	176.471	177.65	177.347	189.836	193.452	187.856	173.913	174.652	179.572
	250	173.484	178.317	174.888	192.825	192.192	190.84	175.439	179.012	180.921
	255	175.809	173.104	176.647	186.747	191.554	186.312	178.203	176.651	179.572
	260	174.157	174.964	169.643	189.189	193.403	191.571	176.128	175.385	181.518
	265	174.157	175.966	173.848	189.189	187.311	183.365	172.515	175.926	175.698
	270	174.157	175.464	175.595	187.406	190.977	187.856	175.439	177.196	182.41
	275	175.316	174.286	172.619	186.747	189.189	187.856	173.217	177.196	178.218
	280	174.825	173.789	174.556	188.537	186.186	182.51	173.217	174.312	178.982
	285	172.996	173.789	172.619	187.406	189.189	187.023	174.419	173.047	174.342
	290	170.391	172.805	173.848	186.846	191.554	190.114	173.021	174.847	177.049
	295	173.669	172.611	171.898	186.289	186.186	183.206	172.821	171.032	175.123
	300	173.853	173.789	168.405	189.27	186.747	187.023	173.723	175.385	177.632
	305	170.596	170.94	171.898	186.846	189.759	184.762	170.306	172.308	175.896
	310	171.548	174.964	170.37	188.623	187.406	183.365	171.806	173.579	177.632
	315	171.745	170.94	169.643	189.189	187.406	184.762	172.012	172.308	172.982
	320	170.124	174.964	171.386	186.846	187.97	182.51	168.869	169.985	176.277
	325	172.702	170.94	172.107	188.06	187.406	181.818	165.932	171.032	175.123
	330	170.596	173.104	169.139	186.289	183.857	185.606	169.32	174.114	175.123
	335	171.745	172.119	170.37	188.623	184.962	183.206	167.155	170.507	175.698
	340	170.799	168.091	169.867	185.075	188.06	186.312	169.591	172.308	175.896
	345	168.975	169.492	168.639	182.09	187.406	184.061	169.096	171.032	172.982
	350	170.124	169.757	170.37	183.857	185.629	184.906	167.155	171.032	175.698
	355	169.916	170.455	168.639	186.846	183.857	183.206	170.306	166.922	173.203
	360	168.975	170.455	169.139	184.962	187.406	183.365	167.394	172.308	173.203
	365	167.822	170.455	168.405	185.736	183.735	180.266	171.014	169.231	175.123
	370	170.596	173.295	169.867	185.185	184.408	180.266	168.375	169.985	172.638
	375	169.655	168.091	169.139	183.857	185.075	182.51	168.605	170.732	170.492
	380	170.124	169.492	169.139	183.183	187.5	185.606	167.155	166.412	169.935
	385	168.508	168.794	168.142	182.635	185.629	182.51	167.394	166.412	172.982
	390	168.289	167.614	166.667	183.308	183.857	180.952	166.181	171.254	171.053
	395	168.975	168.091	169.643	186.289	186.289	182.674	166.667	173.047	172.414
	400	166.897	168.317	165.192	184.524	183.308	184.906	166.909	168.196	173.203
	405	167.358	168.091	164.933	183.308	183.857	179.389	166.909	168.196	172.414
	410	169.444	166.43	167.905	185.629	185.075	178.03	162.518	169.231	172.414
	415	165.746	169.275	166.421	181.548	181.409	181.818	166.909	169.985	171.289
	420	167.582	169.275	166.172	179.792	182.635	176.471	165.698	166.412	168.576
	425	166.897	171.146	166.913	181.548	178.411	180.266	162.791	168.437	171.849
	430	166.205	164.306	165.192	182.764	180.867	183.365	166.425	168.196	170.492
	435	164.138	168.539	164.933	183.432	183.857	181.818	164.74	165.644	168.026
	440	162.983	166.43	165.68	182.09	182.635	180.952	164.964	165.644	173.203
	445	162.983	165.021	164.706	181.009	180.328	178.03	163.531	166.922	168.026
	450	165.289	165.957	163.959	181.548	180.328	181.818	165.945	167.173	167.213
	455	162.983	165.242	163.205	182.222	179.104	180.266	165.698	169.985	172.414
	460	166.437	165.021	164.706	182.222	181.409	180.266	162.791	166.412	169.381
	465	166.897	164.306	163.205	178.571	183.308	181.132	166.181	165.906	172.638
	470	162.983	163.842	166.172	181.548	178.947	178.236	164.006	166.412	167.763
	475	162.534	163.38	162.242	182.222	183.857	181.132	163.059	161.585	169.381
	480	163.686	163.842	163.476	179.792	183.976	175.803	165.217	166.154	169.935
	485	165.289	165.021	167.647	181.009	178.947	178.03	164.74	164.134	170.732
	490	163.435	162.2	162.722	180.473	180.867	176.03	164.483	163.359	170.492
	495	162.088	162.2	164.444	180.328	179.641	178.908	162.59	163.636	167.48
	500	162.534	162.2	161.004	181.009	178.411	179.584	162.59	165.644	169.935
	505	161.379	165.957	162.242	180.867	180.867	178.03	159.884	162.577	167.48
	510	159.341	164.306	161.004	178.73	181.009	183.365	163.059	167.173	166.937
	515	158.904	163.121	162.242	177.515	177.347	178.03	162.791	165.906	164.228
	520	159.341	162.2	161.481	178.042	179.104	181.132	162.59	162.861	166.667
	525	161.379	161.473	159.292	181.009	177.347	176.692	162.791	161.094	170.968
	530	162.534	161.473	160.237	175.775	180.867	177.358	163.059	162.861	164.763
	535	162.534	160.74	162.242	176.296	177.877	179.584	160.637	161.094	164.763
	540	165.289	160.563	161.765	175.595	179.104	177.57	160.173	161.094	165.584
	545	159.78	163.121	162.242	178.042	179.641	173.585	162.59	161.094	165.303
	550	159.341	160.284	161.004	179.259	179.104	174.905	160.637	162.08	162.338
	555	161.202	159.379	160.53	179.259	180.328	175.803	161.85	164.902	169.381
	560	160.055	161.017	160.53	175.258	177.177	175.141	159.712	161.585	166.124
	565	159.341	157.447	161.004	179.941	181.548	177.358	163.059	159.332	165.584
	570	163.237	161.744	157.585	179.792	176.119	176.692	159.712	164.134	164.228
	575	159.341	160.563	160.53	179.792	177.347	174.484	158.046	162.367	164.516
	580	158.904	161.473	157.585	177.347	179.641	173.585	157.287	159.639	165.584
	585	160.055	158.64	160.059	179.259	177.877	173.585	158.501	159.817	163.695
	590	158.184	161.744	159.292	176.296	175.412	174.242	158.96	159.332	163.695
	595	160.494	159.379	160.059	178.042	180.18	174.484	158.046	162.367	167.48
	600	158.621	159.83	157.585	175.258	177.347	175.141	156.835	161.094	161.812
	605	155.862	159.83	159.292	175.775	178.571	178.03	159.712	158.055	166.937
	610	156.164	157.001	160.53	177.515	178.571	172.932	158.501	158.537	166.124
	615	156.593	156.559	158.358	176.296	177.877	177.358	159.254	161.585	163.695
	620	157.319	160.563	160.059	178.73	177.877	175.141	158.798	161.585	166.397
	625	159.78	155.367	158.358	175.775	180.328	175.141	157.593	157.1	163.695
	630	157.75	160.563	160.059	176.82	175.074	172.285	155.172	159.332	160.454
	635	157.319	159.83	158.519	175.775	174.888	170.093	155.937	158.85	160.454
	640	154.583	157.746	158.824	176.296	177.347	175.141	157.593	160.606	164.516
	645	157.75	155.68	157.585	175.258	176.296	172.932	155.62	157.1	166.937
	650	157.319	157.746	156.662	176.991	174.367	171.375	158.046	160.606	165.584
	655	157.025	157.001	155.882	174.556	180.867	172.932	157.593	156.297	163.399
	660	156.164	157.746	155.425	175.775	174.174	172.932	153.957	157.895	162.338
	665	158.47	159.379	153.846	174.041	174.888	169.173	151.515	160.121	162.866
	670	156.164	154.93	157.122	175.775	175.074	176.692	156.835	160.606	161.29
	675	158.621	156.559	158.824	175.074	175.412	172.932	155.937	156.297	160.454
	680	156.164	157.746	157.895	176.296	172.107	172.932	153.957	158.371	159.935
	685	157.75	155.367	157.122	175.074	173.848	171.375	155.172	157.576	162.338
	690	156.164	154.61	157.122	173.333	174.367	173.585	155.937	155.354	163.166
	695	159.341	156.559	154.971	171.598	174.556	172.285	157.143	157.895	161.812
	700	157.75	157.746	157.585	171.091	177.347	172.542	156.695	159.332	159.42
	705	155.007	155.68	155.882	175.074	174.367	171.375	154.286	157.1	160.454
	710	155.007	156.118	154.639	174.743	174.888	175.141	152.639	156.627	160.454
	715	154.583	155.68	152.941	171.598	175.595	175.141	155.937	158.055	159.091
	720	156.593	155.68	156.977	174.556	173.848	171.642	156.385	153.614	158.576
	725	154.583	156.559	154.639	171.598	175.595	166.979	152.299	155.354	158.576
	730	155.738	157.303	157.122	173.529	175.595	170.732	151.862	157.1	159.935
	735	155.007	154.062	154.185	174.556	172.107	170.732	152.205	157.1	160.454
	740	156.164	153.631	152.941	173.529	176.296	171.642	152.542	156.627	157.212
	745	155.007	155.367	151.694	173.333	172.619	171.375	151.773	155.354	161.29
	750	153.425	153.738	155.425	175.775	175.595	170.732	153.409	156.627	157.724
	755	153.425	153.305	156.662	172.821	172.619	173.832	153.409	151.88	156.704
	760	153.741	152.875	151.694	173.529	173.848	169.46	149.718	154.887	165.049
	765	153.425	152.875	154.639	173.529	171.386	165.414	150.142	156.627	160.772
	770	149.111	153.305	151.248	172.821	172.107	169.173	156.25	156.156	157.556
	775	154.583	153.305	152.493	172.312	173.333	172.285	154.173	155.825	158.576
	780	152.682	154.494	153.285	173.333	173.848	172.932	152.542	155.354	160.976
	785	152.682	151.685	153.734	173.333	173.848	169.173	149.786	155.354	158.065
	790	152.589	152.448	154.185	173.333	171.598	169.811	151.344	154.887	158.065
	795	154.161	151.685	152.047	171.091	170.877	171.004	150.917	153.961	157.556
	800	150.273	152.113	152.493	171.091	172.107	168.539	151.773	155.354	158.576
	805	151.02	152.022	153.734	170.37	172.619	170.732	151.344	157.421	158.065
	810	153.005	154.93	153.392	173.333	171.598	170.093	149.36	154.079	157.556
	815	151.432	152.875	150.805	172.312	170.37	170.732	152.542	155.224	156.2
	820	150.685	151.685	149.56	173.333	170.877	166.979	150.142	153.961	154.341
	825	154.583	152.448	152.493	171.806	173.333	168.539	149.718	152.239	159.42
	830	150.273	151.261	151.248	172.821	175.595	169.46	148.936	153.614	156.704
	835	150.685	151.261	152.838	172.515	171.598	170.093	149.36	152.695	160.772
	840	150.685	151.261	152.838	172.312	171.386	168.539	149.36	153.961	158.909
	845	153.005	152.875	151.603	173.529	170.37	167.608	148.936	152.695	158.065
	850	150.685	151.261	153.285	173.021	170.37	168.539	147.309	152.695	158.065
	855	151.02	152.875	149.927	171.303	169.643	167.91	149.718	153.153	159.935
	860	151.847	148.459	150.805	171.806	171.598	164.794	148.936	149.254	157.556
	865	149.111	152.113	152.838	172.821	170.37	172.542	150.997	154.079	156.704
	870	150.273	150.838	147.877	168.869	173.134	172.285	144.476	154.423	155.34
	875	149.111	149.233	152.395	170.588	169.867	171.642	150.492	153.961	155.34
	880	151.432	154.062	149.123	171.806	170.37	170.093	150.568	153.153	158.909
	885	151.02	150.07	150.725	173.021	170.877	170.093	150.568	149.701	158.065
	890	148.704	148.045	149.123	169.367	169.139	166.355	150.917	153.153	160.256
	895	150.273	153.631	151.163	171.303	169.867	170.093	148.148	151.335	152.979
	900	150.611	152.022	149.123	171.806	170.877	168.539	149.296	150.972	158.065
	905	145.578	148.876	151.603	172.312	170.37	167.91	148.096	148.426	158.576
	910	148.704	149.65	147.877	170.37	170.37	166.355	148.515	149.321	156.704
	915	148.704	146.067	149.927	168.869	169.367	166.979	149.718	153.614	156.2
	920	148.704	149.65	149.927	173.021	169.139	171.004	148.148	151.424	159.42
	925	149.457	149.65	146.589	170.588	167.407	164.179	146.479	151.424	157.051
	930	149.864	149.65	149.123	170.803	169.367	166.979	151.344	148.81	154.839
	935	147.541	148.045	147.877	170.588	171.598	170.732	147.309	152.695	154.341
	940	149.457	150.07	149.123	164.706	170.877	165.736	150.917	153.502	155.2
	945	150.611	150.838	150.365	167.647	166.913	170.37	147.679	151.424	155.2
	950	149.864	148.459	147.016	169.367	167.647	164.179	148.515	150.972	153.846
	955	148.299	148.045	148.256	170.588	169.867	170.093	149.718	148.81	151.613
	960	147.139	150	146.199	170.088	171.598	167.286	149.296	150.522	152.979
	965	147.139	149.65	148.256	167.647	171.598	164.794	147.727	150.442	159.935
	970	148.299	150.838	147.445	170.088	169.867	166.355	146.893	150.15	151.125
	975	145.578	146.853	149.123	168.869	172.619	168.539	147.265	149.701	155.2
	980	146.739	149.65	147.016	170.588	167.407	166.979	146.067	152.695	154.341
	985	146.739	150.838	146.589	168.375	167.647	168.831	148.876	151.88	157.895
	990	145.975	149.233	145.773	170.088	171.598	165.414	146.893	149.701	157.556
	995	144.414	148.045	147.016	168.869	169.139	167.91	146.893	151.786	152
	1000	149.051	147.632	148.688	168.375	170.37	165.736	148.515	151.786	152.488
	1005	145.578	146.853	149.123	168.375	167.407	166.355	146.479	149.254	149.758
	1010	145.975	148.459	146.199	170.088	166.913	169.46	148.096	148.81	154.341
	1015	145.975	144.866	145.773	167.647	167.407	166.355	146.893	147.541	155.2
	1020	147.139	150	147.445	166.667	166.913	165.736	145.275	148.81	155.698
	1025	146.341	148.045	147.826	168.375	169.139	168.831	146.479	147.982	151.515
	1030	145.578	144.847	145.349	165.932	166.913	167.91	146.067	147.982	152.866
	1035	147.139	146.853	147.059	167.155	170.088	167.286	146.479	148.368	154.705
	1040	146.341	146.067	147.016	167.155	167.407	167.286	144.886	148.81	153.846
	1045	146.341	146.036	143.687	169.591	168.869	169.46	146.479	153.846	153.724
	1050	146.739	148.818	146.165	169.591	168.142	162.011	146.479	148.368	150.16
	1055	143.247	149.65	147.445	171.598	169.367	162.011	147.265	149.701	148.8
	1060	147.099	149.233	144.928	167.155	167.905	166.355	143.662	147.103	152
	1065	148.299	147.632	146.165	166.421	169.867	166.667	144.476	148.81	150.16
	1070	147.497	147.632	143.271	166.181	166.421	166.667	146.067	147.541	150.16
	1075	146.739	147.632	147.826	166.421	166.667	162.011	143.258	147.103	150.16
	1080	146.341	145.658	144.949	167.155	166.421	163.227	144.46	147.929	151.515
	1085	146.739	146.444	146.165	168.375	166.913	165.736	144.056	146.667	153.846
	1090	142.857	146.036	143.271	170.588	165.192	166.355	146.067	147.103	151.033
	1095	145.183	146.036	145.374	165.447	166.421	164.51	144.46	146.667	152.866
	1100	147.497	141.667	145.773	166.667	166.667	162.963	142.454	147.982	157.556
	1105	145.183	147.632	147.016	166.667	166.913	171.004	144.46	147.103	153.724
	1110	144.79	144.444	144.928	167.647	168.142	163.569	145.686	150.522	151.515
	1115	142.857	146.814	142.857	162.996	168.142	162.011	145.658	144.56	151.515
	1120	142.469	146.853	144.928	167.155	165.192	163.569	145.658	145.833	153.355
	1125	144.011	146.444	140.784	170.588	167.407	165.736	144.46	148.368	151.033
	1130	145.183	146.036	142.857	165.447	166.421	163.569	142.857	146.628	150.641
	1135	144.79	144.044	144.105	165.932	167.647	165.736	146.067	148.368	149.682
	1140	144.399	145.631	144.509	167.394	167.164	165.736	141.655	146.667	150.641
	1145	143.631	145.251	144.928	163.743	164.444	162.963	143.258	144.543	154.705
	1150	144.414	144.847	145.773	165.932	162.996	165.736	145.275	146.667	154.705
	1155	145.183	144.444	147.016	166.667	166.913	162.011	142.857	147.541	149.682
	1160	143.243	142.061	144.928	170.088	166.913	159.851	142.458	145.401	150.641
	1165	145.183	144.444	142.442	165.698	168.142	162.362	144.056	145.401	150.555
	1170	142.469	144.444	140.784	164.223	168.142	166.052	143.654	144.131	149.682
	1175	142.084	143.255	143.271	166.181	164.706	162.617	141.655	145.401	148.325
	1180	143.243	149.584	142.442	166.181	166.913	165.736	142.454	144.131	147.854
	1185	143.631	143.255	143.687	166.421	166.667	163.569	144.056	144.97	147.854
	1190	144.79	142.462	141.618	163.265	165.932	162.963	142.454	143.279	148.8
	1195	143.243	144.044	141.618	164.483	167.647	166.667	140.449	146.233	146.497
	1200	142.084	144.847	144.105	168.375	165.932	161.41	145.251	146.628	148.734

## Sheet: Figure 5C Titin V13P V15P
Time	wt	wt	wt	vta	vta	vta	eq6	eq6	eq6	v13p, v15p
0	149	165	155	147	137	130	119	124	145	Polarization
5	104	113	110	137	132	134	122	120	132
10	73	91	86	127	122	120	109	108	116
15	66	70	70	115	111	114	97	89	108
20	48	61	58	109	100	102	87	83	95
25	43	54	55	99	93	92	73	68	82
30	41	48	49	89	80	84	63	67	77
35	37	43	48	81	76	75	58	60	69
40	33	43	40	78	65	73	55	55	62
45	29	36	38	68	64	68	48	48	61
50	29	38	35	65	58	61	45	48	57
55	25	30	31	58	54	57	38	39	47				y0	y0	x0	x0	A1	A1	t1	t1	A2	A2	t2	t2	Statistics	Statistics
60	23	30	29	58	51	49	36	39	43			Proteasome	Value	Standard Error	Value	Standard Error	Value	Standard Error	Value	Standard Error	Value	Standard Error	Value	Standard Error	Reduced Chi-Sqr	Adj. R-Square	t fast	t slow	k fast per min	k slow per min		Sub
65	21	30	31	51	43	47	33	33	41			Wild-type Trial 1	-13.7934	0.30581	-4.80098	4570160	56.1925	1994760	128.742	6.44573	161.716	65402800	11.3002	0.67285	7.32387	0.98139	11.3002	128.742	5.30964	0.466049	30c	Titin V13P V15P
70	21	27	29	47	45	43	34	34	38			Wild-type Trial 2	-12.6921	0.29382	-5.26135	5819930	181.761	94034300	11.2494	0.47222	62.3763	2229020	162.864	5.50566	4.83952	0.99014	11.2494	162.864	5.33359	0.368406	30c	Titin V13P V15P
75	15	23	25	47	41	36	29	30	36			Wild-type Trial 3	-11.7417	0.3046	-2.27142	11783400	59.8237	4512220	156.227	5.95779	125.742	122924000	12.0536	0.59513	5.51768	0.98785	12.0536	156.227	4.97776	0.384057	30c	Titin V13P V15P
80	8	25	25	43	43	43	29	26	34			Rpn5-VTENKIF Trial 1	-7.25097	0.93689	-0.13917	--	30.4177	--	321.251	49.0409	125.656	--	51.1485	1.80509	3.97106	0.9945	51.1485	321.251	1.17305	0.18677	30c	Titin V13P V15P
85	11	25	20	42	37	36	25	28	31			Rpn5-VTENKIF Trial 2	-8.07806	0.72043	-0.74545	--	115.586	--	44.8816	1.92628	36.7129	--	270.833	31.8153	4.73981	0.99273	44.8816	270.833	1.33685	0.221539	30c	Titin V13P V15P
90	11	23	18	38	33	34	24	25	29			Rpn5-VTENKIF Trial 3	-10.9959	2.09399	3.87061	--	26.7475	--	450.913	115.063	115.029	--	53.1347	2.0179	5.58681	0.99154	53.1347	450.913	1.12921	0.133063	30c	Titin V13P V15P
95	13	19	16	36	33	36	22	23	29			Rpt6-EQ Trial 1	-9.64541	0.84194	-1.09296	10911900	109.014	32051800	37.1134	1.68957	33.1219	1228630	294.168	36.8311	5.84178	0.988	37.1134	294.168	1.61667	0.203965	30c	Titin V13P V15P
100	12	19	14	34	26	27	22	21	27			Rpt6-EQ Trial 2	-9.51491	0.80506	-3.61211	--	32.1256	--	316.956	35.9187	116.805	--	37.419	1.39833	4.1507	0.99123	37.419	316.956	1.60347	0.189301	30c	Titin V13P V15P
105	10	17	16	30	28	27	24	21	22			Rpt6-EQ Trial 3	-6.30079	0.50099	0.36159	12459100	36.8225	2039450	224.95	22.0102	113.789	37815900	37.4896	1.58513	4.60548	0.99229	37.4896	224.95	1.60044	0.266726	30c	Titin V13P V15P
110	8	19	18	29	26	27	20	21	24
115	4	15	19	25	28	25	20	19	24
120	6	17	16	30	24	21	15	17	20
125	4	12	10	27	24	21	20	21	20				k fast per min	Standard Deviation
130	4	13	10	19	22	21	13	15	20			Wild-type	5.207	0.198885
135	2	10	12	19	18	21	18	12	20			Rpn5-VTENKIF	1.21304	0.109445
140	2	10	10	19	20	17	11	12	16			Rpt6-EQ	1.60686	0.00862641
145	0	8	12	23	16	19	13	12	18
150	2	10	8	19	18	17	15	12	9
155	-2	10	10	19	16	10	11	12	15
160	-4	8	8	17	14	14	11	16	13
165	-2	4	6	19	14	14	13	12	13
170	-2	8	4	17	16	12	13	8	9
175	-4	8	6	17	14	10	9	8	13
180	-4	4	6	17	12	14	9	8	9
185	-4	2	8	13	14	8	11	10	7
190	-6	6	6	15	14	8	9	8	11
195	-6	8	4	13	16	12	4	8	7
200	-2	2	2	12	12	10	9	4	13
205	-2	4	2	8	12	10	7	8	11
210	-2	6	2	10	10	14	9	6	9
215	-2	4	2	6	12	6	6	6	9
220	-8	2	2	6	6	10	4	8	7
225	-6	4	2	8	8	8	6	6	7
230	-6	2	4	8	10	4	6	6	7
235	-6	-2	0	10	8	2	4	4	4
240	-4	0	2	8	8	8	2	6	6
245	-4	0	4	6	4	4	6	4	4
250	-4	2	-2	8	4	8	4	4	9
255	-8	0	2	6	4	4	0	2	0
260	-2	0	-2	8	4	8	2	2	6
265	-4	-2	0	8	6	6	2	6	6
270	-6	-2	0	6	8	4	6	4	6
275	-6	-2	-2	6	6	2	4	2	4
280	-6	-4	-2	4	2	6	-2	2	6
285	-4	0	-2	8	6	6	0	6	2
290	-6	-2	-4	4	4	2	4	4	6
295	-6	2	0	6	4	4	0	0	0
300	-4	-4	-4	4	6	-2	2	2	2
305	-6	-2	-4	6	0	6	-2	4	2
310	-4	-4	-6	8	0	4	0	4	2
315	-8	-4	-6	4	2	4	6	0	2
320	-6	-2	-2	4	2	6	0	4	2
325	-6	-2	-4	4	2	2	0	4	4
330	-8	-4	-4	6	2	0	0	2	6
335	-8	-6	0	2	0	0	4	0	0
340	-6	-2	-4	2	2	2	0	0	0
345	-6	-4	-4	-2	-2	0	-2	0	9
350	-10	-6	-4	2	2	2	0	2	-2
355	-8	-8	-10	2	0	2	0	2	4
360	-10	-2	-4	2	-4	2	-2	0	-2
365	-8	-4	-6	0	0	0	-2	-2	2
370	-8	-6	-6	0	4	4	2	0	2
375	-4	-10	-6	-2	2	2	0	0	-2
380	-8	-2	-6	6	2	0	4	2	2
385	-12	-6	-4	6	0	4	-2	0	2
390	-10	-6	-8	2	0	-4	0	2	4
395	-10	-6	-4	2	4	0	-2	0	-2
400	-8	-6	-10	0	2	0	-2	0	0
405	-12	-8	-2	0	0	2	-2	-2	0
410	-10	-8	-4	2	0	0	0	0	-2
415	-12	-8	-4	4	0	-2	-4	0	2
420	-8	-6	-8	2	0	0	0	-4	0
425	-8	-8	-10	0	2	-2	0	2	0
430	-10	-8	-4	-2	0	-4	0	0	-2
435	-6	-10	-4	4	-2	-2	-4	-2	0
440	-14	-10	-6	0	4	2	-2	-4	0
445	-12	-6	-8	2	-2	0	-2	-4	-2
450	-12	-8	-4	-2	2	0	0	0	-2
455	-12	-10	-6	0	-2	0	-4	0	-2
460	-10	-8	-8	0	0	0	-2	0	0
465	-10	-8	-8	-2	-4	0	-6	-2	-2
470	-12	-8	-8	0	-4	-2	0	-2	-2
475	-8	-10	-8	0	0	-4	-4	-4	-2
480	-12	-10	-6	0	-2	0	0	-4	-2
485	-12	-8	-6	-2	4	-6	-2	-2	0
490	-12	-8	-10	0	-2	-4	-2	0	2
495	-10	-10	-8	0	-4	-4	-4	-4	-6
500	-12	-10	-10	0	0	-4	-6	-2	-4
505	-12	-6	-8	-2	-2	-2	-2	-2	-2
510	-14	-6	-8	-2	-2	-6	-6	-2	-6
515	-10	-8	-4	-2	0	-4	-4	-4	-2
520	-12	-10	-8	-2	-4	-2	0	-4	-2
525	-12	-6	-8	0	-6	-2	-2	-6	0
530	-12	-6	-8	-2	0	-2	-4	-2	0
535	-12	-6	-10	-2	-2	-6	-6	-2	-4
540	-14	-8	-6	0	-4	-2	-6	-2	-4
545	-14	-10	-10	0	-2	-2	-4	-4	-4
550	-14	-8	-8	0	-6	0	-6	-2	0
555	-10	-10	-12	2	-4	-4	-6	-4	-6
560	-16	-8	-8	-2	-2	0	-8	-2	-6
565	-14	-14	-10	-4	-2	-4	-4	-8	-2
570	-12	-10	-8	-2	-4	-2	-6	-6	-4
575	-12	-12	-10	0	-4	-4	0	-2	-6
580	-14	-8	-12	-2	-2	-4	-4	-4	-2
585	-10	-10	-12	0	-4	-2	-2	-4	-2
590	-14	-8	-10	-2	-2	-4	-8	-4	-8
595	-14	-10	-14	-4	-6	-4	-8	-4	-4
600	-14	-10	-8	-4	-4	-4	-4	-6	-4
605	-14	-10	-10	2	-2	-6	-2	-6	-2
610	-12	-10	-12	-4	-10	-4	-6	-6	-4
615	-12	-8	-8	-4	-2	-4	-2	-2	-2
620	-14	-12	-12	-2	-2	-2	-4	-6	-4
625	-14	-14	-10	-2	-4	-6	-8	-6	-4
630	-16	-8	-10	-2	-4	-4	-2	-4	-6
635	-14	-12	-10	-4	-8	-4	-6	-4	-2
640	-14	-8	-8	-4	-2	-4	-4	-6	-6
645	-16	-10	-8	-4	-8	-4	-6	-4	-2
650	-12	-12	-10	-2	-4	0	-8	-2	-4
655	-14	-12	-10	-6	-4	-6	-4	-6	-4
660	-12	-10	-12	-4	-6	-6	-4	-2	0
665	-12	-14	-12	-2	-4	-8	-6	-10	-4
670	-12	-12	-14	-4	-2	-2	-6	-8	-4
675	-17	-14	-12	0	-4	-2	-6	-8	-4
680	-12	-10	-8	-2	-6	-4	-10	-8	-6
685	-14	-12	-8	-6	-8	-6	-6	0	-4
690	-14	-14	-8	-2	-8	-2	-6	-6	-4
695	-18	-14	-12	-6	-2	-6	-6	-6	-6
700	-12	-12	-10	-6	0	-4	-4	-6	0
705	-14	-12	-12	-4	-2	-6	-8	-10	-2
710	-14	-10	-10	-4	-4	-6	-4	-6	-4
715	-12	-12	-10	-4	-6	-2	-6	-2	-4
720	-18	-12	-10	-2	-6	-6	-6	-6	-4
725	-10	-12	-10	-4	-6	-4	-8	-6	-8
730	-16	-12	-12	-2	-4	-2	-6	-6	-6
735	-14	-14	-12	-4	-4	-4	-6	-8	-6
740	-16	-14	-14	0	-6	-4	-8	-4	0
745	-12	-12	-14	-6	-4	-2	-4	-8	-4
750	-12	-12	-14	-6	-8	-8	-8	-4	-11
755	-18	-12	-14	-6	-9	-6	-4	-4	-4
760	-12	-10	-12	-6	-6	-8	-10	-8	-2
765	-12	-14	-14	-6	-8	-6	-10	-10	-4
770	-16	-12	-12	-6	-6	-10	-10	-8	-9
775	-14	-14	-12	-4	-4	-8	-6	-8	-4
780	-14	-12	-14	-2	-6	-8	-6	-8	-4
785	-14	-16	-12	-4	-8	-6	-8	-6	-4
790	-14	-14	-12	-4	-8	-8	-10	-4	-6
795	-16	-16	-12	-6	-4	-8	-12	-6	-6
800	-14	-14	-12	-2	-8	-6	-4	-8	-4
805	-12	-14	-16	-2	-6	-14	-8	-8	-6
810	-18	-14	-10	-2	-4	-6	-8	-10	-2
815	-14	-12	-12	-4	-6	-4	-10	-10	-6
820	-17	-14	-10	-2	-6	-10	-4	-8	-4
825	-16	-10	-14	-6	-8	-6	-8	-10	-8
830	-16	-14	-12	-4	-6	-6	-8	-4	-8
835	-12	-14	-16	-4	-6	-6	-8	-8	-6
840	-16	-14	-16	-4	-4	-6	-6	-6	-8
845	-14	-16	-10	-6	-4	-8	-6	-6	-8
850	-14	-16	-10	-6	-6	-4	-8	-6	-6
855	-12	-16	-12	-8	-8	-6	-12	-4	-6
860	-14	-14	-16	-4	-6	-8	-6	-8	-4
865	-22	-16	-12	-4	-8	-8	-8	-10	-4
870	-18	-12	-14	-2	-8	-4	-8	-8	-6
875	-16	-14	-14	-4	-6	-8	-10	-8	-6
880	-16	-12	-12	-6	-6	-6	-6	-10	-6
885	-16	-12	-10	-4	-11	-10	-8	-8	-6
890	-14	-12	-10	-10	-9	-8	-6	-6	-6
895	-14	-16	-12	-6	-6	-10	-8	-6	-8
900	-12	-14	-12	-6	-8	-10	-10	-8	-6
905	-12	-14	-12	-4	-9	-4	-12	-8	-4
910	-18	-14	-12	-8	-6	-8	-6	-8	-4
915	-18	-8	-12	-8	-4	-10	-8	-6	-6
920	-14	-14	-14	-8	-8	-6	-10	-8	-8
925	-18	-14	-14	-6	-8	-6	-8	-8	-8
930	-16	-14	-14	-6	-8	-6	-10	-6	-2
935	-17	-14	-16	-4	-8	-6	-12	-8	-6
940	-16	-14	-14	-12	-8	-8	-8	-12	-8
0	?????	?????	?????	?????	?????	?????	?????	?????	?????
0	?????	?????	?????	?????	?????	?????	?????	?????	?????
0	?????	?????	?????	?????	?????	?????	?????	?????	?????
0	?????	?????	?????	?????	?????	?????	?????	?????	?????
0	?????	?????	?????	?????	?????	?????	?????	?????	?????
0	?????	?????	?????	?????	?????	?????	?????	?????	?????
0	?????	?????	?????	?????	?????	?????	?????	?????	?????
0	?????	?????	?????	?????	?????	?????	?????	?????	?????
0	?????	?????	?????	?????	?????	?????	?????	?????	?????
0	?????	?????	?????	?????	?????	?????	?????	?????	?????
0	?????	?????	?????	?????	?????	?????	?????	?????	?????
0	?????	?????	?????	?????	?????	?????	?????	?????	?????
0	?????	?????	?????	?????	?????	?????	?????	?????	?????
0	?????	?????	?????	?????	?????	?????	?????	?????	?????
0	?????	?????	?????	?????	?????	?????	?????	?????	?????
0	?????	?????	?????	?????	?????	?????	?????	?????	?????
0	?????	?????	?????	?????	?????	?????	?????	?????	?????
0	?????	?????	?????	?????	?????	?????	?????	?????	?????
0	?????	?????	?????	?????	?????	?????	?????	?????	?????
0	?????	?????	?????	?????	?????	?????	?????	?????	?????
0	?????	?????	?????	?????	?????	?????	?????	?????	?????
0	?????	?????	?????	?????	?????	?????	?????	?????	?????
0	?????	?????	?????	?????	?????	?????	?????	?????	?????
0	?????	?????	?????	?????	?????	?????	?????	?????	?????
0	?????	?????	?????	?????	?????	?????	?????	?????	?????
0	?????	?????	?????	?????	?????	?????	?????	?????	?????
0	?????	?????	?????	?????	?????	?????	?????	?????	?????
0	?????	?????	?????	?????	?????	?????	?????	?????	?????
0	?????	?????	?????	?????	?????	?????	?????	?????	?????
0	?????	?????	?????	?????	?????	?????	?????	?????	?????
0	?????	?????	?????	?????	?????	?????	?????	?????	?????
0	?????	?????	?????	?????	?????	?????	?????	?????	?????
0	?????	?????	?????	?????	?????	?????	?????	?????	?????
0	?????	?????	?????	?????	?????	?????	?????	?????	?????
0	?????	?????	?????	?????	?????	?????	?????	?????	?????
0	?????	?????	?????	?????	?????	?????	?????	?????	?????
0	?????	?????	?????	?????	?????	?????	?????	?????	?????
0	?????	?????	?????	?????	?????	?????	?????	?????	?????
0	?????	?????	?????	?????	?????	?????	?????	?????	?????
0	?????	?????	?????	?????	?????	?????	?????	?????	?????
0	?????	?????	?????	?????	?????	?????	?????	?????	?????
0	?????	?????	?????	?????	?????	?????	?????	?????	?????
0	?????	?????	?????	?????	?????	?????	?????	?????	?????
0	?????	?????	?????	?????	?????	?????	?????	?????	?????
0	?????	?????	?????	?????	?????	?????	?????	?????	?????
0	?????	?????	?????	?????	?????	?????	?????	?????	?????
0	?????	?????	?????	?????	?????	?????	?????	?????	?????
0	?????	?????	?????	?????	?????	?????	?????	?????	?????
0	?????	?????	?????	?????	?????	?????	?????	?????	?????
0	?????	?????	?????	?????	?????	?????	?????	?????	?????
0	?????	?????	?????	?????	?????	?????	?????	?????	?????
0	?????	?????	?????	?????	?????	?????	?????	?????	?????

## Sheet: Figure 5 Supplement 1B
	Time (s)	Wild-type Average FRET	Wild-type SEM	Rpn5-VTENKIF Average FRET	Rpn5-VTENKIF SEM	Rpt6-EQ Average FRET	Rpt6-EQ SEM	Final Data
	8	0.313667	0.0206348	0	0.0161872	0	0
	11	0.355723	0.0707516	0.0467285	0.0186914	0	0
	14	0.430099	0.0657843	0.0747657	0.0247264	0.0512821	0.025641
	17	0.46388	0.0524566	0.121494	0.0186914	0.0769231	0.0444116
	20	0.502334	0.050923	0.13084	0.0186914	0.115385	0.0314037
	23	0.541859	0.0529239	0.140186	0.0280371	0.128205	0.025641
	26	0.561621	0.0436665	0.168223	0.0161872	0.102564	0.0678398
	29	0.584985	0.042496	0.186914	0.0186914	0.0769231	0.0444116
	32	0.583915	0.0440198	0.19626	0.0161872	0.153846	0.0444116
	35	0.634927	0.0436665	0.186914	0.0186914	0.192308	0.0314037
	38	0.644273	0.042496	0.214951	0.00934571	0.128205	0.025641
	41	0.652547	0.0309339	0.205606	0.0247264	0.102564	0.0512821
	44	0.668708	0.0352995	0.224297	0.0161872	0.128205	0.0678398
	47	0.683797	0.0393754	0.224297	0.0161872	0.128205	0.0678398
	50	0.697816	0.0309339	0.233643	0.00934571	0.179487	0.0678398
	53	0.702489	0.0314013	0.242988	0.0186914	0.179487	0.0678398
	56	0.718649	0.0322804	0.242988	0.0247264	0.179487	0.0678398
	59	0.737341	0.0352995	0.252334	0.0161872	0.205128	0.0512821
	62	0.732668	0.03647	0.252334	0	0.205128	0.0512821
	65	0.746686	0.0322804	0.242988	0.0247264	0.230769	0.0444116
	68	0.75243	0.032767	0.271026	0.0247264	0.230769	0.0444116
	71	0.760705	0.0322804	0.271026	0.0247264	0.205128	0.025641
	74	0.771122	0.0309339	0.289717	0.00934571	0.25641	0.0678398
	77	0.766449	0.0360712	0.280371	0.0161872	0.205128	0.0512821
	80	0.766449	0.0260962	0.308408	0.0161872	0.230769	0.0444116
	83	0.790884	0.0287055	0.308408	0.0161872	0.282051	0.025641
	86	0.786211	0.0254013	0.308408	0	0.282051	0.0512821
	89	0.790884	0.037429	0.317754	0.00934571	0.25641	0.025641
	92	0.790884	0.0340106	0.3271	0.0186914	0.282051	0.0512821
	95	0.805973	0.03647	0.317754	0.0186914	0.307692	0.0444116
	98	0.795557	0.0278201	0.3271	0.00934571	0.25641	0.0678398
	101	0.81639	0.0294004	0.317754	0.00934571	0.282051	0.025641
	104	0.821063	0.0282299	0.3271	0.00934571	0.282051	0.0512821
	107	0.822134	0.0287055	0.3271	0.00934571	0.333333	0.025641
	110	0.81639	0.0252109	0.345791	0.00934571	0.282051	0.025641
	113	0.821063	0.0282299	0.345791	0.00934571	0.333333	0.025641
	116	0.821063	0.0282299	0.336445	0.0161872	0.282051	0.0512821
	119	0.825736	0.0260962	0.345791	0.00934571	0.307692	0.0444116
	122	0.825736	0.0260962	0.345791	0.00934571	0.307692	0.0444116
	125	0.819992	0.0204544	0.345791	0.00934571	0.333333	0.025641
	128	0.839754	0.0282299	0.345791	0.00934571	0.358974	0.025641
	131	0.824665	0.0213398	0.355137	0.00934571	0.333333	0.025641
	134	0.835082	0.0282299	0.364483	0	0.307692	0.0444116
	137	0.824665	0.0352995	0.364483	0.0161872	0.333333	0.025641
	140	0.825736	0.0260962	0.373828	0.00934571	0.358974	0.025641
	143	0.830409	0.0309339	0.373828	0.00934571	0.307692	0.0444116
	146	0.839754	0.0282299	0.364483	0	0.333333	0.025641
	149	0.850171	0.0287055	0.373828	0.00934571	0.333333	0.0512821
	152	0.844427	0.0252109	0.373828	0.00934571	0.333333	0.0512821
	155	0.850171	0.0287055	0.364483	0.0161872	0.333333	0.025641
	158	0.854844	0.0278201	0.364483	0	0.333333	0.025641
	161	0.845498	0.0254013	0.39252	0	0.333333	0.025641
	164	0.839754	0.0260962	0.401865	0.00934571	0.384615	0.0444116
	167	0.845498	0.0254013	0.39252	0	0.384615	0.0444116
	170	0.838683	0.0180356	0.39252	0.0161872	0.410256	0.025641
	173	0.854844	0.0278201	0.39252	0	0.333333	0.025641
	176	0.824665	0.0234735	0.383174	0.00934571	0.333333	0.025641
	179	0.835082	0.0282299	0.401865	0.00934571	0.358974	0.025641
	182	0.860588	0.0213398	0.39252	0	0.358974	0.025641
	185	0.854844	0.0278201	0.429903	0.00934571	0.410256	0.025641
	188	0.845498	0.0193662	0.411211	0.00934571	0.384615	0.0444116
	191	0.835082	0.0260962	0.420557	0	0.358974	0.025641
	194	0.843356	0.0213398	0.420557	0	0.358974	0.025641
	197	0.839754	0.022792	0.411211	0.00934571	0.410256	0.025641
	200	0.854844	0.0127578	0.420557	0.0161872	0.384615	0.0444116
	203	0.860588	0.0213398	0.411211	0.00934571	0.435897	0.025641
	206	0.869933	0.0180356	0.420557	0	0.410256	0.025641
	209	0.865261	0.0204544	0.420557	0	0.410256	0.0678398
	212	0.859517	0.0214999	0.411211	0.00934571	0.435897	0.025641
	215	0.869933	0.0234735	0.420557	0	0.384615	0.0444116
	218	0.859517	0.0193662	0.429903	0.00934571	0.410256	0.025641
	221	0.839754	0.0106699	0.420557	0	0.435897	0.025641
	224	0.854844	0.0278201	0.420557	0	0.461538	0
	227	0.869933	0.0234735	0.439248	0.00934571	0.410256	0.0678398
	230	0.854844	0.0226704	0.439248	0.00934571	0.410256	0.025641
	233	0.853773	0.0139741	0.420557	0	0.435897	0.025641
	236	0.8491	0.0139741	0.429903	0.00934571	0.410256	0.0512821
	239	0.869933	0.0213398	0.429903	0.00934571	0.435897	0.025641
	242	0.86419	0.016062	0.45794	0.00934571	0.435897	0.025641
	245	0.859517	0.0193662	0.429903	0.00934571	0.435897	0.025641
	248	0.844427	0.0073657	0.439248	0.00934571	0.461538	0.0444116
	251	0.844427	0.0073657	0.439248	0.00934571	0.435897	0.025641
	254	0.850171	0.016062	0.45794	0.00934571	0.435897	0.025641
	257	0.853773	0.0180356	0.448594	0	0.461538	0
	260	0.858446	0.0073657	0.448594	0.0161872	0.461538	0.0444116
	263	0.858446	0.0130887	0.439248	0.00934571	0.461538	0.0444116
	266	0.853773	0.0106699	0.448594	0	0.461538	0
	269	0.853773	0.0139741	0.448594	0.0161872	0.435897	0.025641
	272	0.844427	0.0073657	0.45794	0.00934571	0.461538	0.0444116
	275	0.859517	0.016062	0.448594	0	0.435897	0.025641
	278	0.859517	0.016062	0.448594	0.0161872	0.487179	0.025641
	281	0.868862	0.0127578	0.467285	0.0186914	0.461538	0
	284	0.844427	0.0073657	0.448594	0	0.461538	0
	287	0.858446	0.0130887	0.45794	0.00934571	0.487179	0.025641
	290	0.839754	0.0106699	0.45794	0.0186914	0.487179	0.025641
	293	0.844427	0.0073657	0.448594	0.0161872	0.435897	0.025641
	296	0.8491	0.0139741	0.467285	0.00934571	0.435897	0.025641
	299	0.8491	0.0106699	0.45794	0.00934571	0.512821	0.025641
	302	0.83294	0.016062	0.45794	0.00934571	0.435897	0.025641
	305	0.844427	0.0130887	0.467285	0.00934571	0.512821	0.025641
	308	0.839754	0.0106699	0.476631	0	0.512821	0.0678398
	311	0.844427	0.0130887	0.467285	0.0186914	0.487179	0.025641
	314	0.844427	0.0130887	0.467285	0.0186914	0.461538	0.0444116
	317	0.839754	0.0106699	0.485977	0.00934571	0.538462	0.0444116
	320	0.865261	0.0204544	0.45794	0.00934571	0.512821	0.025641
	323	0.829338	0.0180356	0.45794	0.00934571	0.538462	0.0444116
	326	0.8491	0.0260962	0.467285	0.0186914	0.538462	0
	329	0.8491	0.022792	0.485977	0.00934571	0.564103	0.0512821
	332	0.844427	0.0130887	0.467285	0.0186914	0.461538	0.0444116
	335	0.859517	0.016062	0.476631	0.0161872	0.538462	0.0444116
	338	0.8491	0.0139741	0.495322	0.0186914	0.538462	0.0444116
	341	0.839754	0.0139741	0.476631	0.0280371	0.512821	0.025641
	344	0.859517	0.0214999	0.467285	0.0186914	0.512821	0.025641
	347	0.838683	0.0192792	0.467285	0.0186914	0.538462	0
	350	0.850171	0.0214999	0.476631	0.0161872	0.512821	0.025641
	353	0.860588	0.0161078	0.467285	0.0186914	0.512821	0.025641
	356	0.850171	0.0214999	0.476631	0.0161872	0.564103	0.025641
	359	0.834011	0.0130887	0.45794	0.0247264	0.538462	0
	362	0.829338	0.0139741	0.467285	0.0186914	0.538462	0.0444116
	365	0.829338	0.0314013	0.476631	0.0161872	0.589744	0.025641
	368	0.844427	0.0309339	0.485977	0.0247264	0.564103	0.0512821
	371	0.824665	0.0139741	0.495322	0.0186914	0.538462	0
	374	0.830409	0.024644	0.476631	0.0323745	0.512821	0.025641
	377	0.844427	0.0261775	0.467285	0.0186914	0.564103	0.025641
	380	0.824665	0.0314013	0.476631	0.0161872	0.564103	0.025641
	383	0.8491	0.0234735	0.476631	0.0161872	0.564103	0.025641
	386	0.850171	0.016062	0.485977	0.0247264	0.564103	0.025641
	389	0.839754	0.0234735	0.485977	0.0247264	0.564103	0.025641
	392	0.839754	0.0234735	0.485977	0.0186914	0.589744	0.025641
	395	0.854844	0.0335432	0.485977	0.00934571	0.589744	0.025641
	398	0.839754	0.0234735	0.495322	0.0186914	0.589744	0.025641
	401	0.830409	0.0261775	0.485977	0.0247264	0.615385	0
	404	0.829338	0.0314013	0.495322	0.0186914	0.589744	0.025641
	407	0.829338	0.0338905	0.476631	0.0161872	0.564103	0.0512821
	410	0.814248	0.0308392	0.485977	0.0247264	0.615385	0.0444116
	413	0.8491	0.0352995	0.495322	0.0186914	0.589744	0.025641
	416	0.835082	0.0352995	0.476631	0.0161872	0.589744	0.0512821
	419	0.835082	0.0384709	0.476631	0.0280371	0.564103	0.0512821
	422	0.845498	0.0399182	0.467285	0.0186914	0.589744	0.025641
	425	0.844427	0.024644	0.485977	0.0247264	0.564103	0.025641
	428	0.824665	0.0282299	0.495322	0.0186914	0.589744	0.025641
	431	0.835082	0.0291341	0.476631	0.0280371	0.589744	0.025641
	434	0.829338	0.0282299	0.504668	0.0280371	0.589744	0.0678398
	437	0.829338	0.0338905	0.504668	0.0161872	0.615385	0.0769231
	440	0.839754	0.0384709	0.485977	0.0247264	0.615385	0.0444116
	443	0.834011	0.0309339	0.495322	0.0336964	0.615385	0.0444116
	446	0.835082	0.0409601	0.485977	0.0247264	0.615385	0
	449	0.844427	0.0437266	0.485977	0.0247264	0.615385	0.0444116
	452	0.834011	0.0351858	0.476631	0.0161872	0.666667	0.0512821
	455	0.8491	0.0384709	0.485977	0.0247264	0.589744	0.025641
	458	0.814248	0.0340106	0.495322	0.0186914	0.641026	0.0512821
	461	0.859517	0.037429	0.485977	0.0336964	0.615385	0.0444116
	464	0.828267	0.0340106	0.495322	0.0336964	0.615385	0.0444116
	467	0.834011	0.0446046	0.495322	0.0336964	0.615385	0.0444116
	470	0.818921	0.0308392	0.495322	0.0336964	0.615385	0.0444116
	473	0.834011	0.0309339	0.495322	0.0247264	0.615385	0.0444116
	476	0.853773	0.0384709	0.504668	0.0280371	0.615385	0.0444116
	479	0.834011	0.0309339	0.495322	0.0186914	0.641026	0.025641
	482	0.8491	0.0384709	0.495322	0.0247264	0.615385	0.0444116
	485	0.844427	0.03647	0.504668	0.0323745	0.641026	0.0512821
	488	0.844427	0.0380035	0.495322	0.0336964	0.615385	0.0888231
	491	0.859517	0.0340106	0.485977	0.0247264	0.589744	0.0678398
	494	0.8491	0.0384709	0.495322	0.0247264	0.666667	0.0512821
	497	0.869933	0.0360712	0.504668	0.0161872	0.666667	0.0678398
	500	0.853773	0.0279482	0.495322	0.0336964	0.615385	0.0444116
	503	0.853773	0.0352995	0.514014	0.0247264	0.641026	0.0678398
	506	0.838683	0.0413763	0.495322	0.0247264	0.615385	0.0888231
	509	0.853773	0.0352995	0.495322	0.0247264	0.615385	0.0769231
	512	0.838683	0.0413763	0.495322	0.0186914	0.615385	0.0444116
	515	0.848029	0.0393754	0.485977	0.0247264	0.641026	0.0678398
	518	0.858446	0.03647	0.504668	0.0323745	0.615385	0.0769231
	521	0.853773	0.0352995	0.514014	0.0247264	0.641026	0.0678398
	524	0.848029	0.0294004	0.495322	0.0186914	0.641026	0.0512821
	527	0.8491	0.0213398	0.504668	0.0280371	0.641026	0.0512821
	530	0.868862	0.0372389	0.504668	0.0323745	0.589744	0.111767
	533	0.86419	0.0254013	0.504668	0.0280371	0.641026	0.09245
	536	0.858446	0.03647	0.495322	0.0186914	0.641026	0.09245
	539	0.863119	0.0331658	0.495322	0.0336964	0.615385	0.0444116
	542	0.858446	0.03647	0.504668	0.0280371	0.615385	0.0888231
	545	0.863119	0.0331658	0.495322	0.0186914	0.615385	0.0888231
	548	0.873535	0.0321239	0.504668	0.0280371	0.641026	0.09245
	551	0.857375	0.0382049	0.514014	0.0247264	0.641026	0.09245
	554	0.872464	0.03647	0.514014	0.040737	0.589744	0.111767
	557	0.846958	0.0308392	0.495322	0.0247264	0.615385	0.0769231
	560	0.888625	0.0282299	0.495322	0.0186914	0.692308	0.0444116
	563	0.848029	0.0252109	0.476631	0.0280371	0.666667	0.0678398
	566	0.863119	0.0352995	0.485977	0.0247264	0.641026	0.0678398
	569	0.858446	0.0322804	0.495322	0.0336964	0.666667	0.0678398
	572	0.877137	0.0352995	0.495322	0.0247264	0.666667	0.0678398
	575	0.863119	0.0331658	0.504668	0.0280371	0.666667	0.09245
	578	0.872464	0.0380035	0.504668	0.0323745	0.666667	0.0678398
	581	0.882881	0.0312386	0.504668	0.0323745	0.666667	0.102564
	584	0.848029	0.0322804	0.485977	0.0247264	0.666667	0.0678398
	587	0.887554	0.0321239	0.504668	0.0280371	0.717949	0.0512821
	590	0.872464	0.0322804	0.495322	0.0336964	0.666667	0.102564
	593	0.877137	0.0298616	0.495322	0.0336964	0.666667	0.0678398
	596	0.878208	0.0342576	0.504668	0.0323745	0.692308	0.0888231
	599	0.877137	0.0260962	0.495322	0.0186914	0.717949	0.09245
	602	0.88181	0.0331658	0.504668	0.0323745	0.692308	0.0769231
	605	0.866721	0.0408484	0.514014	0.0247264	0.666667	0.0678398
	608	0.867792	0.0331658	0.495322	0.0247264	0.717949	0.0512821
	611	0.882881	0.0312386	0.485977	0.040737	0.692308	0.0888231
	614	0.893298	0.0252109	0.514014	0.0247264	0.666667	0.0678398
	617	0.872464	0.0380035	0.514014	0.0247264	0.692308	0.0769231
	620	0.88181	0.022792	0.514014	0.040737	0.692308	0.0769231
	623	0.88181	0.0331658	0.504668	0.0323745	0.666667	0.0678398
	626	0.887554	0.0342576	0.504668	0.0323745	0.666667	0.0678398
	629	0.877137	0.0298616	0.514014	0.0373828	0.692308	0.0444116
	632	0.872464	0.0322804	0.514014	0.0247264	0.641026	0.0678398
	635	0.886483	0.0322804	0.504668	0.0428274	0.717949	0.0512821
	638	0.877137	0.0354105	0.495322	0.0336964	0.717949	0.025641
	641	0.88181	0.0387147	0.514014	0.0373828	0.717949	0.0512821
	644	0.886483	0.0252109	0.514014	0.0373828	0.717949	0.0678398
	647	0.887554	0.0288197	0.52336	0.0336964	0.717949	0.0678398
	650	0.88181	0.0331658	0.514014	0.0247264	0.74359	0.025641
	653	0.877137	0.0408484	0.504668	0.0428274	0.692308	0.0769231
	656	0.8969	0.0312386	0.504668	0.0323745	0.717949	0.0678398
	659	0.892227	0.0288197	0.514014	0.0336964	0.74359	0.0678398
	662	0.886483	0.0378294	0.514014	0.0247264	0.692308	0.0888231
	665	0.88181	0.0352995	0.504668	0.0323745	0.74359	0.0678398
	668	0.8969	0.0312386	0.504668	0.0280371	0.717949	0.0678398
	671	0.8969	0.0312386	0.514014	0.0247264	0.74359	0.025641
	674	0.887554	0.0288197	0.504668	0.0161872	0.717949	0.0678398
	677	0.8969	0.0312386	0.504668	0.0280371	0.74359	0.025641
	680	0.892227	0.0321239	0.514014	0.0247264	0.717949	0.0512821
	683	0.895829	0.0387147	0.514014	0.0247264	0.74359	0.025641
	686	0.891156	0.0408484	0.514014	0.0373828	0.74359	0.025641
	689	0.911989	0.0354105	0.514014	0.0247264	0.74359	0.0512821
	692	0.891156	0.0354105	0.532705	0.0280371	0.74359	0.0512821
	695	0.891156	0.0354105	0.52336	0.0336964	0.794872	0.025641
	698	0.886483	0.0321063	0.514014	0.040737	0.74359	0.0512821
	701	0.88181	0.0408484	0.514014	0.0373828	0.769231	0.0444116
	704	0.886483	0.0378294	0.514014	0.040737	0.794872	0.025641
	707	0.892227	0.0288197	0.52336	0.0336964	0.794872	0.025641
	710	0.88181	0.0387147	0.495322	0.0186914	0.692308	0.0444116
	713	0.8969	0.0394769	0.514014	0.0373828	0.794872	0.025641
	716	0.892227	0.0403623	0.504668	0.0323745	0.794872	0.025641
	719	0.886483	0.0378294	0.52336	0.0336964	0.769231	0.0444116
	722	0.901572	0.0321239	0.514014	0.0247264	0.74359	0.0512821
	725	0.892227	0.0370581	0.514014	0.0247264	0.74359	0.025641
	728	0.907316	0.0265574	0.504668	0.0280371	0.74359	0.0678398
	731	0.893298	0.0378294	0.52336	0.0336964	0.820513	0.0512821
	734	0.887554	0.042496	0.52336	0.0336964	0.820513	0.025641
	737	0.901572	0.0403623	0.514014	0.0247264	0.794872	0.025641
	740	0.902643	0.0298616	0.514014	0.040737	0.769231	0.0444116
	743	0.88181	0.0387147	0.532705	0.0280371	0.74359	0.0512821
	746	0.892227	0.0403623	0.52336	0.0336964	0.820513	0.025641
	749	0.892227	0.0403623	0.504668	0.0280371	0.794872	0.025641
	752	0.878208	0.0370581	0.514014	0.0247264	0.794872	0.025641
	755	0.902643	0.045584	0.52336	0.0336964	0.769231	0.0444116
	758	0.877137	0.0354105	0.514014	0.0247264	0.794872	0.025641
	761	0.891156	0.0354105	0.52336	0.0186914	0.794872	0.025641
	764	0.891156	0.0354105	0.504668	0.0280371	0.794872	0.025641
	767	0.891156	0.0387147	0.52336	0.0336964	0.820513	0.025641
	770	0.8969	0.0394769	0.532705	0.0280371	0.794872	0.025641
	773	0.8969	0.0436665	0.532705	0.0323745	0.820513	0.025641
	776	0.88181	0.0408484	0.52336	0.0336964	0.794872	0.025641
	779	0.901572	0.0370581	0.514014	0.0247264	0.794872	0.025641
	782	0.907316	0.0446987	0.532705	0.0280371	0.820513	0.025641
	785	0.907316	0.0389756	0.514014	0.0373828	0.769231	0.0444116
	788	0.8969	0.0312386	0.52336	0.0336964	0.820513	0.025641
	791	0.892227	0.0370581	0.532705	0.0280371	0.794872	0.025641
	794	0.892227	0.0403623	0.52336	0.0336964	0.794872	0.025641
	797	0.892227	0.0370581	0.532705	0.0280371	0.820513	0.025641
	800	0.901572	0.0370581	0.52336	0.0336964	0.871795	0.0512821
	803	0.891156	0.0354105	0.514014	0.0247264	0.769231	0.0444116
	806	0.892227	0.0370581	0.514014	0.0247264	0.846154	7.85046e-17
	809	0.906245	0.0448817	0.532705	0.0280371	0.820513	0.025641
	812	0.8969	0.0394769	0.532705	0.0428274	0.769231	0.0444116
	815	0.907316	0.0446987	0.542051	0.0373828	0.820513	0.025641
	818	0.886483	0.0467335	0.532705	0.0280371	0.846154	0.0444116
	821	0.8969	0.0394769	0.532705	0.0280371	0.846154	0.0444116
	824	0.88181	0.0387147	0.514014	0.040737	0.820513	0.0678398
	827	0.8969	0.0394769	0.514014	0.040737	0.820513	0.025641
	830	0.892227	0.0370581	0.52336	0.0336964	0.846154	0.0444116
	833	0.901572	0.0370581	0.532705	0.0280371	0.846154	0.0444116
	836	0.892227	0.0403623	0.514014	0.0247264	0.871795	0.025641
	839	0.8969	0.0337539	0.532705	0.0428274	0.820513	0.025641
	842	0.8969	0.0394769	0.532705	0.0280371	0.820513	0.025641
	845	0.906245	0.0370581	0.542051	0.040737	0.846154	0.0444116
	848	0.901572	0.0370581	0.532705	0.0280371	0.846154	0.0444116
	851	0.910918	0.0337539	0.532705	0.0280371	0.820513	0.025641
	854	0.8969	0.0394769	0.532705	0.0428274	0.846154	0.0444116
	857	0.8969	0.0459988	0.52336	0.0336964	0.871795	0.0512821
	860	0.891156	0.0387147	0.542051	0.0247264	0.820513	0.025641
	863	0.906245	0.0370581	0.514014	0.0373828	0.820513	0.025641
	866	0.891156	0.0354105	0.532705	0.0280371	0.820513	0.025641
	869	0.88181	0.0497526	0.532705	0.0280371	0.846154	7.85046e-17
	872	0.892227	0.0370581	0.542051	0.0247264	0.846154	0.0444116
	875	0.886483	0.0378294	0.532705	0.0280371	0.897436	0.025641
	878	0.911989	0.0477177	0.542051	0.040737	0.846154	7.85046e-17
	881	0.8969	0.0394769	0.532705	0.0323745	0.794872	0.025641
	884	0.901572	0.0370581	0.542051	0.0373828	0.846154	0.0444116
	887	0.886483	0.0378294	0.542051	0.0247264	0.846154	7.85046e-17
	890	0.901572	0.0370581	0.532705	0.0323745	0.820513	0.025641
	893	0.8969	0.0394769	0.514014	0.0247264	0.820513	0.025641
	896	0.906245	0.0370581	0.532705	0.0280371	0.871795	0.025641
	899	0.885412	0.0422798	0.532705	0.0280371	0.820513	0.025641
	902	0.892227	0.0370581	0.532705	0.0428274	0.794872	0.025641
	905	0.906245	0.049303	0.532705	0.0323745	0.846154	0.0888231
	908	0.892227	0.0547409	0.542051	0.0247264	0.846154	0.0444116
	911	0.906245	0.0370581	0.532705	0.0161872	0.820513	0.025641
	914	0.906245	0.0370581	0.542051	0.0520347	0.846154	0.0444116
	917	0.901572	0.0470154	0.542051	0.0336964	0.846154	0.0444116
	920	0.876066	0.0488882	0.551397	0.040737	0.871795	0.025641
	923	0.88181	0.0443147	0.542051	0.0247264	0.871795	0.025641
	926	0.8969	0.0394769	0.551397	0.0336964	0.846154	0.0444116
	929	0.874995	0.0403623	0.551397	0.0336964	0.820513	0.025641
	932	0.876066	0.0446987	0.542051	0.0247264	0.897436	0.025641
	935	0.890085	0.0446987	0.542051	0.0247264	0.846154	7.85046e-17
	938	0.901572	0.0370581	0.542051	0.0247264	0.820513	0.025641
	941	0.901572	0.0448817	0.532705	0.0428274	0.871795	0.025641
	944	0.907316	0.0446987	0.542051	0.0336964	0.897436	0.025641
	947	0.892227	0.0403623	0.551397	0.0247264	0.846154	0.0444116
	950	0.901572	0.0370581	0.542051	0.0247264	0.820513	0.025641
	953	0.895829	0.0443147	0.542051	0.0247264	0.820513	0.0512821
	956	0.910918	0.0337539	0.551397	0.0336964	0.871795	0.025641
	959	0.8969	0.0394769	0.532705	0.0323745	0.846154	0.0444116
	962	0.886483	0.0409089	0.532705	0.0323745	0.871795	0.025641
	965	0.8969	0.0394769	0.551397	0.0247264	0.846154	0.0444116
	968	0.885412	0.045584	0.560742	0.0323745	0.820513	0.025641
	971	0.900502	0.0467335	0.542051	0.0247264	0.846154	0.0444116
	974	0.895829	0.0443147	0.542051	0.0247264	0.846154	7.85046e-17
	977	0.885412	0.0477177	0.532705	0.0323745	0.846154	0.0444116
	980	0.901572	0.0370581	0.551397	0.040737	0.846154	0.0444116
	983	0.895829	0.0497526	0.560742	0.0323745	0.871795	0.025641
	986	0.892227	0.0370581	0.551397	0.0247264	0.871795	0.025641
	989	0.886483	0.0467335	0.560742	0.0323745	0.897436	0.025641
	992	0.885412	0.0422798	0.532705	0.0323745	0.897436	0.025641
	995	0.891156	0.0443147	0.551397	0.0247264	0.897436	0.025641
	998	0.891156	0.0387147	0.542051	0.0336964	0.897436	0.025641
	1001	0.892227	0.0403623	0.560742	0.0323745	0.871795	0.0512821
	1004	0.886483	0.0467335	0.532705	0.0323745	0.871795	0.0512821
	1007	0.891156	0.0514122	0.532705	0.0323745	0.897436	0.025641
	1010	0.880739	0.0422798	0.542051	0.0247264	0.871795	0.0512821
	1013	0.880739	0.045584	0.551397	0.0336964	0.871795	0.0512821
	1016	0.891156	0.0443147	0.551397	0.0186914	0.871795	0.0678398
	1019	0.871393	0.0434369	0.551397	0.0186914	0.871795	0.025641
	1022	0.885412	0.0422798	0.551397	0.0247264	0.897436	0.025641
	1025	0.876066	0.0446987	0.542051	0.0247264	0.871795	0.0512821
	1028	0.885412	0.0401327	0.551397	0.0336964	0.871795	0.0512821
	1031	0.901572	0.0456673	0.560742	0.0323745	0.871795	0.025641
	1034	0.901572	0.0370581	0.579434	0.0336964	0.923077	0.0444116
	1037	0.891156	0.0497526	0.551397	0.0247264	0.871795	0.025641
	1040	0.880739	0.045584	0.551397	0.0336964	0.897436	0.025641
	1043	0.891156	0.0476189	0.560742	0.0323745	0.897436	0.025641
	1046	0.891156	0.0443147	0.542051	0.0247264	0.871795	0.0512821
	1049	0.886483	0.0467335	0.551397	0.0247264	0.897436	0.025641
	1052	0.901572	0.0370581	0.560742	0.0280371	0.871795	0.025641
	1055	0.880739	0.0422798	0.542051	0.0247264	0.846154	0.0444116
	1058	0.891156	0.0497526	0.570088	0.0247264	0.846154	0.0444116
	1061	0.871393	0.0422798	0.560742	0.0161872	0.871795	0.0512821
	1064	0.880739	0.0477177	0.542051	0.0247264	0.897436	0.025641
	1067	0.906245	0.0403623	0.542051	0.0247264	0.871795	0.025641
	1070	0.8969	0.0499172	0.551397	0.0336964	0.871795	0.0512821
	1073	0.891156	0.0443147	0.570088	0.0247264	0.846154	7.85046e-17
	1076	0.900502	0.0410105	0.560742	0.0280371	0.897436	0.025641
	1079	0.906245	0.042496	0.560742	0.0280371	0.897436	0.025641
	1082	0.891156	0.0354105	0.542051	0.0247264	0.897436	0.025641
	1085	0.900502	0.0467335	0.542051	0.00934571	0.897436	0.025641
	1088	0.880739	0.0570422	0.570088	0.0247264	0.897436	0.025641
	1091	0.895829	0.048108	0.560742	0.0161872	0.897436	0.025641
	1094	0.876066	0.0446987	0.560742	0.0323745	0.897436	0.025641
	1097	0.895829	0.0443147	0.570088	0.00934571	0.871795	0.025641
	1100	0.880739	0.0477177	0.570088	0.0247264	0.871795	0.0512821
	1103	0.906245	0.042496	0.560742	0.0323745	0.897436	0.025641
	1106	0.900502	0.0467335	0.570088	0.0247264	0.871795	0.025641
	1109	0.890085	0.0446987	0.570088	0.0186914	0.871795	0.025641
	1112	0.886483	0.0467335	0.560742	0.0161872	0.871795	0.0512821
	1115	0.880739	0.0422798	0.542051	0.0247264	0.871795	0.025641
	1118	0.901572	0.042496	0.570088	0.0247264	0.897436	0.025641
	1121	0.886483	0.0410105	0.560742	0.0161872	0.871795	0.0512821
	1124	0.891156	0.0443147	0.570088	0.0247264	0.923077	0.0444116
	1127	0.895829	0.0354105	0.570088	0.0247264	0.923077	0.0444116
	1130	0.910918	0.0394769	0.560742	0.0280371	0.846154	0.0444116
	1133	0.906245	0.0370581	0.551397	0.0186914	0.948718	0.0512821
	1136	0.891156	0.0443147	0.570088	0.0247264	0.897436	0.0512821
	1139	0.877137	0.0476189	0.560742	0.0280371	0.897436	0.025641
	1142	0.900502	0.0505268	0.551397	0.0186914	0.871795	0.0512821
	1145	0.876066	0.0488882	0.560742	0.0161872	0.897436	0.025641
	1148	0.885412	0.0477177	0.579434	0.0186914	0.897436	0.025641
	1151	0.895829	0.0535459	0.560742	0.0161872	0.897436	0.025641
	1154	0.871393	0.0422798	0.579434	0.0186914	0.897436	0.025641
	1157	0.895829	0.0443147	0.560742	0.0161872	0.923077	0.0444116
	1160	0.921335	0.0425515	0.579434	0.0186914	0.923077	0.0444116
	1163	0.890085	0.0446987	0.570088	0.0247264	0.897436	0.025641
	1166	0.886483	0.0467335	0.560742	0.0161872	0.871795	0.0512821
	1169	0.885412	0.0422798	0.560742	0.0161872	0.923077	0.0444116
	1172	0.906245	0.042496	0.570088	0.0247264	0.923077	0.0444116
	1175	0.886483	0.0467335	0.570088	0.0247264	0.897436	0.025641
	1178	0.886483	0.0410105	0.570088	0.0247264	0.897436	0.025641
	1181	0.895829	0.0443147	0.570088	0.0247264	0.923077	0.0444116
	1184	0.895829	0.0354105	0.570088	0.0247264	0.871795	0.0512821
	1187	0.906245	0.049303	0.570088	0.00934571	0.897436	0.025641
	1190	0.895829	0.0354105	0.58878	0.0161872	0.871795	0.025641
	1193	0.885412	0.0401327	0.570088	0.0247264	0.871795	0.0512821
	1196	0.880739	0.0401327	0.579434	0.0186914	0.923077	0.0444116
	1199	0.886483	0.0378294	0.579434	0.0186914	0.923077	0.0444116
	1202	0.891156	0.0497526	0.570088	0.00934571	0.846154	0.0444116
	1205	0.901572	0.042496	0.570088	0.00934571	0.897436	0.025641
	1208	0.906245	0.0470154	0.560742	0.0280371	0.897436	0.025641
